# Supplementary material
Source: MDPI journal article supplement (https://www.mdpi.com/2073-4352/12/10/1342)
Supplement: s1 [file s1]

Archive with 5 entries (5 files):
- alpha_GlyCA.cif
- alpha_GlyCA_checkcif.pdf
- gamma_GlyCA.cif
- gamma_GlyCA_checkcif.pdf
- Gly_CA Crystals-1898847-Suppl Mat  corrected.pdf
