# Supplementary material
Source: MDPI journal article supplement (https://www.mdpi.com/2073-4352/12/10/1342)
Supplement: s1 [file s1 › alpha_GlyCA.cif]

data_a_GlyCA
_audit_creation_date               2022-08-01
_audit_creation_method
;
Olex2 1.2
(compiled 2018.05.29 svn.r3508 for OlexSys, GUI svn.r5506)
;
_shelx_SHELXL_version_number       '2018/3'
_audit_contact_author_address      ?
_audit_contact_author_email        ?
_audit_contact_author_name         ''
_audit_contact_author_phone        ?
_publ_contact_author_id_orcid      ?
_publ_section_references
;
Bourhis, L.J., Dolomanov, O.V., Gildea, R.J., Howard, J.A.K., Puschmann, H.
 (2015). Acta Cryst. A71, 59-75.

Dolomanov, O.V., Bourhis, L.J., Gildea, R.J, Howard, J.A.K. & Puschmann, H.
 (2009), J. Appl. Cryst. 42, 339-341.

Sheldrick, G.M. (2015). Acta Cryst. C71, 3-8.
;
_chemical_name_common              ?
_chemical_name_systematic          ?
_chemical_formula_moiety           'C2 H5 N O2'
_chemical_formula_sum              'C2 H5 N O2'
_chemical_formula_weight           75.07
_chemical_melting_point            ?
loop_
  _atom_type_symbol
  _atom_type_description
  _atom_type_scat_dispersion_real
  _atom_type_scat_dispersion_imag
  _atom_type_scat_source
 'C' 'C' 0.0033 0.0016 'International Tables Vol C Tables 4.2.6.8 and 6.1.1.4'
 'H' 'H' 0.0000 0.0000 'International Tables Vol C Tables 4.2.6.8 and 6.1.1.4'
 'N' 'N' 0.0061 0.0033 'International Tables Vol C Tables 4.2.6.8 and 6.1.1.4'
 'O' 'O' 0.0106 0.0060 'International Tables Vol C Tables 4.2.6.8 and 6.1.1.4'

_shelx_space_group_comment
;
The symmetry employed for this shelxl refinement is uniquely defined
by the following loop, which should always be used as a source of
symmetry information in preference to the above space-group names.
They are only intended as comments.
;
_space_group_crystal_system        'monoclinic'
_space_group_IT_number             14
_space_group_name_H-M_alt          'P 1 21/n 1'
_space_group_name_Hall             '-P 2yn'
loop_
  _space_group_symop_operation_xyz
 'x, y, z'
 '-x+1/2, y+1/2, -z+1/2'
 '-x, -y, -z'
 'x-1/2, -y-1/2, z-1/2'

_cell_length_a                     5.1004(5)
_cell_length_b                     11.9664(9)
_cell_length_c                     5.4570(5)
_cell_angle_alpha                  90
_cell_angle_beta                   111.714(3)
_cell_angle_gamma                  90
_cell_volume                       309.43(5)
_cell_formula_units_Z              4
_cell_measurement_reflns_used      1734
_cell_measurement_temperature      298.0
_cell_measurement_theta_max        26.28
_cell_measurement_theta_min        4.37
_shelx_estimated_absorpt_T_max     ?
_shelx_estimated_absorpt_T_min     ?
_exptl_absorpt_coefficient_mu      0.143
_exptl_absorpt_correction_T_max    0.0276
_exptl_absorpt_correction_T_min    0.0117
_exptl_absorpt_correction_type     multi-scan
_exptl_absorpt_process_details    
 'SADABS-2016/2 (Bruker,2016/2) was used for absorption correction. wR2(int) was 0.0669 before and 0.0432 after correction. The Ratio of minimum to maximum transmission is 0.4239. The \l/2 correction factor is Not present.'
_exptl_absorpt_special_details     ?
_exptl_crystal_colour              colourless
_exptl_crystal_density_diffrn      1.611
_exptl_crystal_density_meas        ?
_exptl_crystal_density_method      ?
_exptl_crystal_description         block
_exptl_crystal_F_000               160
_exptl_crystal_size_max            0.2
_exptl_crystal_size_mid            0.15
_exptl_crystal_size_min            0.1
_exptl_transmission_factor_max     ?
_exptl_transmission_factor_min     ?
_diffrn_reflns_av_R_equivalents    0.0256
_diffrn_reflns_av_unetI/netI       0.0185
_diffrn_reflns_Laue_measured_fraction_full  0.995
_diffrn_reflns_Laue_measured_fraction_max  0.994
_diffrn_reflns_limit_h_max         6
_diffrn_reflns_limit_h_min         -6
_diffrn_reflns_limit_k_max         14
_diffrn_reflns_limit_k_min         -14
_diffrn_reflns_limit_l_max         6
_diffrn_reflns_limit_l_min         -6
_diffrn_reflns_number              3240
_diffrn_reflns_point_group_measured_fraction_full  0.995
_diffrn_reflns_point_group_measured_fraction_max  0.994
_diffrn_reflns_theta_full          25.242
_diffrn_reflns_theta_max           26.353
_diffrn_reflns_theta_min           3.405
_diffrn_ambient_temperature        298.0
_diffrn_detector_area_resol_mean   ?
_diffrn_measured_fraction_theta_full  0.995
_diffrn_measured_fraction_theta_max  0.994
_diffrn_measurement_device_type    'Bruker APEX-II CCD'
_diffrn_measurement_method         '\f and \w scans'
_diffrn_radiation_type             MoK\a
_diffrn_radiation_wavelength       0.71073
_diffrn_source                     ?
_diffrn_standards_number           0
_reflns_Friedel_coverage           0.000
_reflns_Friedel_fraction_full      .
_reflns_Friedel_fraction_max       .
_reflns_number_gt                  538
_reflns_number_total               629
_reflns_special_details
;
 Reflections were merged by SHELXL according to the crystal
 class for the calculation of statistics and refinement.
 
 _reflns_Friedel_fraction is defined as the number of unique
 Friedel pairs measured divided by the number that would be
 possible theoretically, ignoring centric projections and
 systematic absences.
;
_reflns_threshold_expression       'I > 2\s(I)'
_computing_cell_refinement         ?
_computing_data_collection         ?
_computing_data_reduction          ?
_computing_molecular_graphics      'Olex2 (Dolomanov et al., 2009)'
_computing_publication_material    'Olex2 (Dolomanov et al., 2009)'
_computing_structure_refinement    'ShelXL (Sheldrick, 2015)'
_computing_structure_solution      'olex2.solve (Bourhis et al., 2015)'
_refine_diff_density_max           0.186
_refine_diff_density_min           -0.192
_refine_diff_density_rms           0.045
_refine_ls_extinction_coef         .
_refine_ls_extinction_method       none
_refine_ls_goodness_of_fit_ref     1.158
_refine_ls_hydrogen_treatment      constr
_refine_ls_matrix_type             full
_refine_ls_number_parameters       47
_refine_ls_number_reflns           629
_refine_ls_number_restraints       0
_refine_ls_R_factor_all            0.0416
_refine_ls_R_factor_gt             0.0345
_refine_ls_restrained_S_all        1.158
_refine_ls_shift/su_max            0.000
_refine_ls_shift/su_mean           0.000
_refine_ls_structure_factor_coef   Fsqd
_refine_ls_weighting_details      
 'w=1/[\s^2^(Fo^2^)+(0.0596P)^2^+0.0816P] where P=(Fo^2^+2Fc^2^)/3'
_refine_ls_weighting_scheme        calc
_refine_ls_wR_factor_gt            0.1109
_refine_ls_wR_factor_ref           0.1173
_refine_special_details            ?
_olex2_refinement_description
;
1. Fixed Uiso
 At 1.2 times of:
  All C(H,H) groups, All N(H,H,H) groups
2.a Secondary CH2 refined with riding coordinates:
 C2(H2A,H2B)
2.b Idealised Me refined as rotating group:
 N1(H1A,H1B,H1C)
;
_atom_sites_solution_hydrogens     geom
_atom_sites_solution_primary       iterative
_atom_sites_solution_secondary     ?
loop_
  _atom_site_label
  _atom_site_type_symbol
  _atom_site_fract_x
  _atom_site_fract_y
  _atom_site_fract_z
  _atom_site_U_iso_or_equiv
  _atom_site_adp_type
  _atom_site_occupancy
  _atom_site_site_symmetry_order
  _atom_site_calc_flag
  _atom_site_refinement_flags_posn
  _atom_site_refinement_flags_adp
  _atom_site_refinement_flags_occupancy
  _atom_site_disorder_assembly
  _atom_site_disorder_group
 O2 O 0.8055(2) 0.59427(10) 0.7354(2) 0.0414(4) Uani 1 1 d . . . . .
 O1 O 0.3527(3) 0.64165(11) 0.6069(2) 0.0451(4) Uani 1 1 d . . . . .
 N1 N 0.8011(3) 0.59006(12) 0.2408(3) 0.0378(4) Uani 1 1 d . . . . .
 H1A H 0.784734 0.601266 0.074582 0.045 Uiso 1 1 calc GR . . . .
 H1B H 0.797624 0.517053 0.270623 0.045 Uiso 1 1 calc GR . . . .
 H1C H 0.963542 0.618735 0.349386 0.045 Uiso 1 1 calc GR . . . .
 C1 C 0.5758(3) 0.62490(13) 0.5670(3) 0.0333(4) Uani 1 1 d . . . . .
 C2 C 0.5646(4) 0.64497(14) 0.2871(3) 0.0356(4) Uani 1 1 d . . . . .
 H2A H 0.387612 0.616506 0.161973 0.043 Uiso 1 1 calc R . . . .
 H2B H 0.570927 0.724687 0.257577 0.043 Uiso 1 1 calc R . . . .

loop_
  _atom_site_aniso_label
  _atom_site_aniso_U_11
  _atom_site_aniso_U_22
  _atom_site_aniso_U_33
  _atom_site_aniso_U_23
  _atom_site_aniso_U_13
  _atom_site_aniso_U_12
 O2 0.0416(8) 0.0528(8) 0.0314(7) 0.0037(5) 0.0152(6) 0.0060(5)
 O1 0.0382(7) 0.0617(9) 0.0409(7) -0.0038(6) 0.0210(6) 0.0007(6)
 N1 0.0386(8) 0.0472(8) 0.0293(7) 0.0018(6) 0.0147(6) 0.0041(6)
 C1 0.0376(9) 0.0312(8) 0.0334(9) -0.0023(6) 0.0157(7) -0.0033(6)
 C2 0.0347(8) 0.0406(8) 0.0331(9) 0.0032(7) 0.0145(7) 0.0034(6)

_geom_special_details
;
 All esds (except the esd in the dihedral angle between two l.s. planes)
 are estimated using the full covariance matrix.  The cell esds are taken
 into account individually in the estimation of esds in distances, angles
 and torsion angles; correlations between esds in cell parameters are only
 used when they are defined by crystal symmetry.  An approximate (isotropic)
 treatment of cell esds is used for estimating esds involving l.s. planes.
;
loop_
  _geom_bond_atom_site_label_1
  _geom_bond_atom_site_label_2
  _geom_bond_distance
  _geom_bond_site_symmetry_2
  _geom_bond_publ_flag
 O2 C1 1.247(2) . ?
 O1 C1 1.251(2) . ?
 N1 H1A 0.8900 . ?
 N1 H1B 0.8900 . ?
 N1 H1C 0.8900 . ?
 N1 C2 1.475(2) . ?
 C1 C2 1.526(2) . ?
 C2 H2A 0.9700 . ?
 C2 H2B 0.9700 . ?

loop_
  _geom_angle_atom_site_label_1
  _geom_angle_atom_site_label_2
  _geom_angle_atom_site_label_3
  _geom_angle
  _geom_angle_site_symmetry_1
  _geom_angle_site_symmetry_3
  _geom_angle_publ_flag
 H1A N1 H1B 109.5 . . ?
 H1A N1 H1C 109.5 . . ?
 H1B N1 H1C 109.5 . . ?
 C2 N1 H1A 109.5 . . ?
 C2 N1 H1B 109.5 . . ?
 C2 N1 H1C 109.5 . . ?
 O2 C1 O1 125.86(15) . . ?
 O2 C1 C2 117.44(14) . . ?
 O1 C1 C2 116.69(15) . . ?
 N1 C2 C1 111.78(13) . . ?
 N1 C2 H2A 109.3 . . ?
 N1 C2 H2B 109.3 . . ?
 C1 C2 H2A 109.3 . . ?
 C1 C2 H2B 109.3 . . ?
 H2A C2 H2B 107.9 . . ?

loop_
  _geom_torsion_atom_site_label_1
  _geom_torsion_atom_site_label_2
  _geom_torsion_atom_site_label_3
  _geom_torsion_atom_site_label_4
  _geom_torsion
  _geom_torsion_site_symmetry_1
  _geom_torsion_site_symmetry_2
  _geom_torsion_site_symmetry_3
  _geom_torsion_site_symmetry_4
  _geom_torsion_publ_flag
 O2 C1 C2 N1 18.7(2) . . . . ?
 O1 C1 C2 N1 -161.85(14) . . . . ?

_shelx_res_file
;
TITL mo_1207_2_0m_a.res in P2(1)/n
    mo_1207_2_0m.res
    created by SHELXL-2018/3 at 15:06:24 on 01-Aug-2022
REM Old TITL mo_1207_2_0m in P2(1)/n
REM SHELXT solution in P2(1)/n: R1 0.131, Rweak 0.007, Alpha 0.023
REM <I/s> 0.973 for 37 systematic absences, Orientation as input
REM Formula found by SHELXT: C2 N O2
CELL 0.71073 5.1004 11.9664 5.457 90 111.714 90
ZERR 4 0.0005 0.0009 0.0005 0 0.003 0
LATT 1
SYMM 0.5-X,0.5+Y,0.5-Z
SFAC C H N O
UNIT 8 20 4 8

L.S. 4
PLAN  5
TEMP 24.85
CONF
list 4
MORE -1
BOND $H
fmap 2
acta
REM <olex2.extras>
REM <HklSrc "%.\\mo_1207_2_0m.hkl">
REM </olex2.extras>

WGHT    0.059600    0.081600
FVAR       2.72854
O2    4    0.805491    0.594270    0.735366    11.00000    0.04156    0.05282 =
         0.03138    0.00365    0.01519    0.00600
O1    4    0.352723    0.641655    0.606888    11.00000    0.03819    0.06171 =
         0.04095   -0.00378    0.02099    0.00071
N1    3    0.801069    0.590061    0.240838    11.00000    0.03860    0.04724 =
         0.02934    0.00183    0.01465    0.00408
AFIX 137
H1A   2    0.784734    0.601266    0.074582    11.00000   -1.20000
H1B   2    0.797624    0.517053    0.270623    11.00000   -1.20000
H1C   2    0.963542    0.618735    0.349386    11.00000   -1.20000
AFIX   0
C1    1    0.575779    0.624900    0.566971    11.00000    0.03760    0.03122 =
         0.03338   -0.00229    0.01571   -0.00327
C2    1    0.564571    0.644969    0.287115    11.00000    0.03472    0.04064 =
         0.03314    0.00318    0.01453    0.00336
AFIX  23
H2A   2    0.387612    0.616506    0.161973    11.00000   -1.20000
H2B   2    0.570927    0.724687    0.257577    11.00000   -1.20000
AFIX   0
HKLF 4


REM  mo_1207_2_0m_a.res in P2(1)/n
REM wR2 = 0.1173, GooF = S = 1.158, Restrained GooF = 1.158 for all data
REM R1 = 0.0345 for 538 Fo > 4sig(Fo) and 0.0416 for all 629 data
REM 47 parameters refined using 0 restraints

END

WGHT      0.0596      0.0816

REM Highest difference peak  0.186,  deepest hole -0.192,  1-sigma level  0.045
Q1    1   0.5736  0.6290  0.4325  11.00000  0.05    0.19
Q2    1   0.8121  0.6330  0.8853  11.00000  0.05    0.17
Q3    1   0.7781  0.5821  0.8849  11.00000  0.05    0.14
Q4    1   0.7429  0.6466  0.7060  11.00000  0.05    0.13
Q5    1   0.3999  0.5713  0.0282  11.00000  0.05    0.12
;
_shelx_res_checksum                35831
_shelx_hkl_file
;
   1   0   0    0.24    0.94
   1   0   0    0.82    1.16
  -1   0   0    1.19    1.12
  -1   0   0    1.59    1.03
  -2   0   0 2214.59   61.51
   2   0   0 2175.85   62.03
  -2   0   0 2151.83   61.85
   2   0   0 2130.92   61.24
   3   0   0    5.04    3.26
  -3   0   0   -0.42    2.51
   3   0   0    1.16    2.31
  -3   0   0   -2.11    2.23
   4   0   0  150.08    8.99
  -4   0   0  153.01    9.97
  -5   0   0   -3.61    3.40
  -1  -1   0 2251.90   62.60
  -1  -1   0 2281.86   62.41
   1  -1   0 2294.97   62.91
   1  -1   0 2289.98   63.21
  -1   1   0 2290.47   63.26
   1   1   0 2331.27   62.68
  -1   1   0 2269.14   62.90
   2  -1   0 1320.11   40.38
  -2  -1   0 1339.46   39.41
  -2  -1   0 1383.99   40.04
   2  -1   0 1356.48   39.93
  -2   1   0 1370.13   40.54
   2   1   0 1357.20   39.48
   2   1   0 1316.11   39.91
  -2   1   0 1322.17   39.91
  -3  -1   0  724.65   24.52
   3  -1   0  745.89   24.51
  -3  -1   0  602.30   29.64
   3   1   0  755.64   24.11
  -3   1   0  701.95   24.37
   3   1   0  704.25   24.67
  -3   1   0  722.09   26.39
  -4  -1   0 1795.11   53.04
   4  -1   0 1762.67   52.48
  -4   1   0 1774.26   53.44
   4   1   0 1635.06   52.52
   5  -1   0  549.18   20.78
  -5  -1   0  554.51   21.23
  -5   1   0  522.20   21.61
   5   1   0  521.62   20.66
   0  -2   0 1071.08   29.48
   0   2   0 1046.62   30.01
   0   2   0 1085.70   29.36
  -2  -2   0 1455.37   40.99
   2  -2   0 1384.27   41.24
   2  -2   0 1293.41   41.43
  -2  -2   0 1368.51   40.31
   2   2   0 1397.34   40.49
  -2   2   0 1373.48   41.85
   2   2   0 1423.38   38.39
  -2   2   0 1396.70   41.51
   3  -2   0    3.51    3.40
  -3  -2   0    4.81    2.78
   3  -2   0    3.86    2.94
  -3   2   0    2.40    2.97
   3   2   0   -0.10    2.23
  -3   2   0    3.58    2.88
   3   2   0    6.03    3.24
  -4  -2   0   42.67    5.65
   4  -2   0   53.78    5.86
   4   2   0   53.56    6.05
   4   2   0   49.95    6.65
  -4   2   0   58.72    6.64
   5  -2   0  454.68   18.25
  -5  -2   0  444.89   18.35
  -5   2   0  427.03   18.82
   5   2   0  422.92   17.62
   5   2   0  418.02   13.38
   0  -3   0    4.15    1.10
   0  -3   0    5.19    1.33
   0  -3   0    0.52    1.04
   0   3   0    0.65    0.85
   0   3   0   -0.52    0.89
   1  -3   0 7418.74  198.86
   1   3   0 7363.98  197.19
  -1   3   0 7426.23  198.43
  -1   3   0 7419.77  198.79
   2  -3   0 2623.43   78.18
   2  -3   0 2877.78   77.86
  -2  -3   0 2706.23   76.14
  -2  -3   0 2794.21   76.80
   2   3   0 2769.84   74.50
  -2   3   0 2793.08   78.47
   2   3   0 2742.16   76.83
   2   3   0 2797.13   76.54
  -2   3   0 2727.98   77.68
  -3  -3   0   87.42    6.41
   3  -3   0   69.98    6.10
   3  -3   0   69.85    7.26
  -3   3   0   73.85    6.85
   3   3   0   76.56    3.90
  -3   3   0   75.38    6.58
   3   3   0   76.07    6.09
   3   3   0   77.86    5.86
  -4  -3   0 1786.55   53.30
   4  -3   0 1821.34   53.64
  -4   3   0 1799.76   54.58
   4   3   0 1734.13   48.37
   4   3   0 1743.42   55.16
   4   3   0 1772.54   52.80
   5  -3   0   99.49    8.17
  -5  -3   0   99.89    8.02
   5   3   0  117.52    8.07
  -5   3   0  101.93    8.82
   5   3   0  109.27    4.08
  -1  -4   0 6209.91  163.93
  -1  -4   0 6113.40  163.53
   1  -4   0 6359.85  165.60
  -1  -4   0 5638.57  163.43
   1   4   0 6399.85  163.75
   1   4   0 6142.98  163.57
  -1   4   0 5798.84  165.59
   1   4   0 6090.86  163.74
  -1   4   0 6341.50  165.50
  -2  -4   0  187.33    8.35
   2  -4   0  220.18   10.03
  -2  -4   0  187.90    8.46
   2   4   0  204.45    7.50
   2   4   0  208.50    8.77
  -2   4   0  181.61   14.77
   2   4   0  206.78    8.62
  -2   4   0  205.68    9.98
   3  -4   0  566.19   20.98
  -3  -4   0  583.07   20.08
   3   4   0  610.15   20.04
   3   4   0  574.91   20.32
  -3   4   0  543.78   21.22
  -3   4   0  588.62   21.80
   3   4   0  568.21   17.07
   4  -4   0  140.46    9.07
  -4  -4   0  125.96   10.88
  -4   4   0  146.35    9.72
   4   4   0  140.92    5.24
   4   4   0  145.14    8.50
   4   4   0  127.46    9.34
  -5  -4   0   42.89    5.87
   5  -4   0   54.11    6.72
  -5   4   0   53.15    6.76
   5   4   0   57.65    5.97
   0  -5   0   -0.70    1.45
   0  -5   0   -0.37    1.37
   0  -5   0    0.97    1.60
   0   5   0    1.25    1.33
   0   5   0    2.47    1.52
  -1  -5   0   -0.96    1.22
  -1  -5   0   -0.13    1.37
  -1  -5   0    2.35    1.54
   1  -5   0    2.16    2.22
   1  -5   0    1.23    1.69
  -1   5   0    0.99    1.88
   1   5   0    0.64    1.32
   1   5   0   -0.04    1.23
  -2  -5   0    7.20    1.85
   2  -5   0    5.12    3.02
  -2  -5   0    6.14    1.97
   2  -5   0    5.93    2.44
   2   5   0    7.41    2.15
   2   5   0    8.19    1.93
  -2   5   0    4.05    2.66
  -2   5   0    6.33    2.99
   2   5   0    7.72    2.20
  -3  -5   0  779.75   24.93
   3  -5   0  765.53   26.15
  -3   5   0  787.95   26.99
   3   5   0  757.10   24.68
   3   5   0  766.75   22.13
  -3   5   0  702.17   26.87
   3   5   0  767.77   25.07
   4  -5   0  308.79   14.39
  -4  -5   0  323.20   13.68
   4   5   0  304.92   13.91
  -4   5   0  307.79   14.75
  -5  -5   0  339.74   15.21
   5  -5   0  349.73   15.89
   5   5   0  345.59   14.88
  -5   5   0  344.97   16.34
   0  -6   0 1110.68   33.54
   0  -6   0 1073.90   32.07
   0  -6   0 1104.70   32.09
   0   6   0 1084.59   31.64
   0   6   0 1063.94   31.93
   1  -6   0  185.30    8.60
  -1  -6   0  188.59    7.57
  -1  -6   0  189.99    8.63
   1  -6   0  196.01    9.28
  -1  -6   0  178.43    7.64
   1   6   0  179.21    7.58
  -1   6   0  200.80    9.30
   1   6   0  185.01    7.25
  -1   6   0  195.14    8.98
  -2  -6   0 1612.55   46.88
   2  -6   0 1654.91   49.05
  -2  -6   0 1716.21   47.66
  -2   6   0 1661.04   49.74
  -2   6   0 1650.54   49.27
   2   6   0 1639.66   47.04
   2   6   0 1617.99   47.06
   3  -6   0  148.63    9.45
  -3  -6   0  159.45    8.14
   3   6   0  154.56    7.99
  -3   6   0  160.48    9.70
   4  -6   0  130.99    9.21
  -4  -6   0  119.02    7.92
  -4   6   0  121.60    8.89
   4   6   0  133.10    7.96
   4   6   0  107.64    8.49
  -5  -6   0  173.61   10.24
   5  -6   0  178.18   11.39
  -5   6   0  159.69   10.92
   5   6   0  160.03    9.85
   0  -7   0   -0.46    2.10
   0  -7   0   -0.65    2.18
   0  -7   0   -0.35    2.06
   0   7   0    0.47    1.63
   0   7   0    0.74    1.52
  -1  -7   0 3003.83   80.72
   1  -7   0 2973.03   83.45
  -1  -7   0 2755.76   80.28
  -1  -7   0 2843.74   81.78
   1  -7   0 3021.84   82.13
   1  -7   0 2893.55   82.53
  -1   7   0 3003.58   82.03
  -1   7   0 2995.11   82.46
   1   7   0 2922.57   80.06
   1   7   0 2956.23   80.49
  -2  -7   0  218.30   10.40
  -2  -7   0  204.25    8.96
  -2  -7   0  216.48    9.28
   2  -7   0  209.12   10.57
   2   7   0  210.46    8.96
  -2   7   0  242.01   11.36
   2   7   0  226.78    9.06
  -2   7   0  208.50   10.78
   3  -7   0  479.92   18.48
  -3  -7   0  474.33   16.58
   3   7   0  469.18   16.50
   3   7   0  473.65   16.74
  -3   7   0  436.95   18.76
  -4  -7   0  401.49   15.27
   4  -7   0  397.45   18.78
  -4   7   0  365.20   16.91
   4   7   0  376.40   15.50
   4   7   0  394.48   15.16
   5  -7   0    7.55    4.72
  -5  -7   0    5.89    4.31
   5  -7   0    3.47    4.02
  -5   7   0    4.99    6.27
   5   7   0    5.57    3.60
   0  -8   0 2203.50   61.86
   0  -8   0 2115.88   61.30
   0  -8   0 2175.57   62.93
   0   8   0 2165.52   61.09
   0   8   0 2192.48   60.63
   1  -8   0 2260.37   65.19
  -1  -8   0 2169.49   61.90
  -1  -8   0 2260.91   63.82
  -1  -8   0 2230.49   61.95
   1  -8   0 2164.23   63.33
   1   8   0 2184.25   61.42
  -1   8   0 2243.48   63.39
  -1   8   0 2266.57   63.83
   1   8   0 2255.02   62.94
  -2  -8   0  188.78    8.30
   2  -8   0  182.59    9.73
  -2  -8   0  187.29    8.97
  -2   8   0  184.05   10.00
   2   8   0  194.83    8.37
  -2   8   0  207.60   10.53
   2   8   0  185.30    8.07
   3  -8   0  286.46   13.74
  -3  -8   0  281.63   11.65
   3   8   0  279.83   11.64
   3   8   0  301.89   11.66
  -3   8   0  305.64   14.29
  -4  -8   0   96.81    7.07
   4  -8   0   78.49    9.55
   4   8   0   83.62    7.40
   4   8   0   80.07    6.49
  -4   8   0  103.53    8.50
  -5   8   0   92.50    9.52
   0  -9   0    2.48    2.34
   0  -9   0    2.75    2.37
   0   9   0   -1.99    1.96
   0   9   0    3.40    2.14
  -1  -9   0    2.11    2.09
   1  -9   0    5.09    2.70
  -1  -9   0    1.83    2.38
   1  -9   0    3.56    2.63
   1   9   0    1.93    1.96
  -1   9   0    1.84    2.61
  -1   9   0    3.33    2.44
   1   9   0    0.43    1.73
  -2  -9   0  246.12   10.02
  -2  -9   0  244.49   10.71
   2  -9   0  252.99   11.72
   2  -9   0  248.51   12.48
  -2   9   0  233.26   11.64
   2   9   0  244.25    9.59
   2   9   0  250.23    9.57
  -2   9   0  245.37   11.92
   3  -9   0  115.30    9.19
   3  -9   0  123.50    8.76
  -3  -9   0  111.67    6.92
  -3   9   0  126.48    8.96
   3   9   0  115.61    6.84
   3   9   0  115.19    6.58
  -4  -9   0   14.86    3.95
   4  -9   0   14.38    4.50
   4  -9   0   12.28    4.35
  -4   9   0    9.22    4.24
   4   9   0   12.48    3.44
   0 -10   0    9.48    3.43
   0 -10   0   14.05    3.28
   0  10   0   14.29    2.86
   0  10   0   17.68    3.16
  -1 -10   0   68.82    5.39
   1 -10   0   82.19    6.19
  -1 -10   0   63.80    8.62
   1 -10   0   75.90    6.94
   1  10   0   77.37    4.72
  -1  10   0   80.62    5.83
  -1  10   0   79.84    6.39
   1  10   0   71.93    4.94
  -2 -10   0  350.75   13.90
   2 -10   0  348.50   15.70
   2 -10   0  342.01   15.11
  -2 -10   0  346.45   12.73
   2  10   0  330.24   12.03
  -2  10   0  355.57   16.03
   2  10   0  348.27   12.07
  -2  10   0  332.04   14.80
  -3 -10   0  248.61   10.22
   3 -10   0  177.80   13.15
   3 -10   0  236.99   12.13
   3  10   0  219.46    9.57
  -3  10   0  243.07   12.16
   3  10   0  240.63    9.62
  -4 -10   0   26.44    6.26
   4 -10   0   31.54    5.69
   4  10   0   29.46    4.08
   0 -11   0   -0.06    2.55
   0 -11   0    0.07    2.74
   0  11   0    0.50    2.15
   0  11   0    0.92    2.21
   1 -11   0  710.76   23.93
  -1 -11   0  708.15   24.86
  -1 -11   0  713.26   22.78
   1 -11   0  728.14   25.82
   1  11   0  707.55   22.02
  -1  11   0  758.01   24.18
  -1  11   0  700.79   23.60
   1  11   0  710.35   21.66
   2 -11   0    2.60    3.36
  -2 -11   0    8.84    2.93
   2 -11   0    0.77    3.73
  -2 -11   0    7.05    2.95
   2  11   0    1.16    2.63
   2  11   0    3.56    2.12
  -2  11   0    0.98    3.00
  -2  11   0    2.69    4.12
   3 -11   0  170.12   11.06
  -3 -11   0  190.04    9.32
   3 -11   0  182.18   10.92
   3  11   0  176.49    8.89
   3  11   0  180.98    7.88
  -3  11   0  194.75   10.77
   4  11   0    5.98    3.00
  -4  11   0   -3.07    3.87
   0 -12   0   -2.86    2.86
   0 -12   0    4.07    2.88
   0  12   0   -1.97    2.38
   0  12   0    2.71    2.45
   1 -12   0  151.07    9.96
  -1 -12   0  138.98    9.59
   1 -12   0  158.68    8.92
  -1 -12   0  147.29    7.99
   1  12   0  147.51    6.81
  -1  12   0  147.02    8.16
  -1  12   0  162.57    8.69
   1  12   0  152.16    6.97
  -2 -12   0  212.23   10.50
  -2 -12   0  207.93    9.29
   2 -12   0  190.98   12.04
   2 -12   0  196.23   10.70
  -2  12   0  207.44   10.83
   2  12   0  202.82    7.92
   2  12   0  196.93    7.89
  -2  12   0  196.64   11.11
  -3 -12   0   32.52    4.72
   3 -12   0   39.21    5.97
  -3  12   0   39.19    5.69
   0 -13   0   -7.43    3.07
   0  13   0   -0.21    2.67
  -1 -13   0   -4.55    3.62
   1 -13   0    3.06    3.54
  -1 -13   0    0.75    3.02
   1 -13   0   -4.52    3.51
   1  13   0   -1.98    1.99
   1  13   0   -2.94    2.79
  -1  13   0   -0.37    2.70
   2 -13   0   91.42    8.13
  -2 -13   0  108.13    8.23
   2  13   0   98.49    4.96
   2  13   0   97.70    4.72
  -2  13   0   93.09    7.87
   0 -14   0   55.35    7.41
   0 -14   0   41.02    5.98
   0  14   0   48.51    4.97
  -1 -14   0   55.89    6.51
   1 -14   0   56.57    6.29
  -1  14   0   58.76    6.12
   1  14   0   58.91    4.24
   2  14   0    9.10    1.73
  -2  14   0    9.28    3.78
   6   0  -1   -1.37    3.58
  -6   0   1   -3.46    4.02
   5   0  -1   59.77    3.80
   5   0  -1   73.45    7.00
  -5   0   1   63.26    7.00
   4   0  -1   -0.61    2.46
  -4   0   1   -0.61    2.70
   4   0  -1    2.70    1.46
  -3   0   1 1820.80   55.44
   3   0  -1 1903.04   56.46
  -3   0   1 1942.42   56.50
   3   0  -1 1995.87   56.31
   3   0  -1 1883.67   52.13
   2   0  -1    0.92    1.85
  -2   0   1    1.83    1.67
   2   0  -1    1.27    0.93
  -2   0   1    6.06    2.26
   2   0  -1   -0.82    1.43
  -1   0   1 1177.26   34.40
  -1   0   1 1227.61   33.66
  -1   0   1 1229.14   34.57
   1   0  -1 1219.44   35.56
   1   0  -1 1201.80   34.59
   0   0  -1   13.08    1.73
   0   0  -1    9.50    1.55
   0   0   1    8.18    1.40
  -1   0  -1 8022.68  219.15
  -1   0  -1 8575.29  220.02
   1   0   1 7895.38  219.65
   1   0   1 8315.41  219.22
   2   0   1    0.54    2.28
  -2   0  -1   -2.21    2.33
  -2   0  -1   -0.67    2.02
   2   0   1    2.77    2.07
  -3   0  -1    1.33    3.15
   3   0   1    5.71    4.01
   3   0   1    0.93    2.57
  -4   0  -1    2.12    3.58
   4   0   1    2.93    2.89
  -5   0  -1   21.62    5.64
   5   0   1   15.94    4.27
  -6  -1   1   12.35    4.79
   6  -1  -1    2.95    5.44
   6   1  -1    2.23    3.98
  -6   1   1    4.60    4.22
   5  -1  -1  157.45   10.30
   5  -1  -1  152.96    6.93
  -5  -1   1  155.57    9.96
  -5   1   1  153.34   10.71
   5   1  -1  147.27    9.76
   4  -1  -1   63.69    7.32
  -4  -1   1   90.01    7.35
   4   1  -1   95.95    3.59
   4   1  -1   96.41    7.60
  -4   1   1   97.82    8.04
   3  -1  -1  770.79   26.96
  -3  -1   1  765.73   25.77
   3  -1  -1  790.79   23.56
  -3  -1   1  789.88   26.36
   3   1  -1  800.15   21.64
   3   1  -1  802.76   26.30
  -3   1   1  775.85   26.09
   3   1  -1  776.13   26.45
  -3   1   1  826.44   26.91
   2  -1  -1  300.99   11.98
  -2  -1   1  295.57   11.74
   2  -1  -1  306.22   10.30
   2   1  -1  289.23   11.65
  -2   1   1  291.11   11.96
  -2   1   1  286.34   11.55
   2   1  -1  318.26   12.14
   1  -1  -1   53.97    3.22
  -1  -1   1   47.42    3.35
   1  -1  -1   54.87    3.70
   1  -1  -1   55.40    3.33
  -1  -1   1   52.47    4.60
   1   1  -1   50.09    3.61
   1   1  -1   57.16    3.51
  -1   1   1   52.12    3.25
  -1   1   1   61.55    3.38
   0  -1   1 5499.56  142.75
   0  -1  -1 5376.84  141.18
   0  -1   1 5146.78  142.36
   0   1  -1 5519.32  142.76
   0   1   1 5327.74  142.57
   0   1  -1 5019.95  142.25
   0   1   1 5279.43  141.10
  -1  -1  -1  596.83   22.10
  -1  -1  -1  571.46   18.07
   1  -1   1  585.45   19.36
   1   1   1  580.26   17.97
  -1   1  -1  595.96   19.52
   1   1   1  564.30   18.29
  -1   1  -1  575.00   19.08
  -2  -1  -1  852.85   26.67
  -2  -1  -1  735.21   27.32
   2  -1   1  817.74   27.14
   2  -1   1  783.49   27.21
   2   1   1  837.24   25.87
  -2   1  -1  844.91   27.43
   2   1   1  880.53   26.82
  -3  -1  -1   -0.86    2.66
   3  -1   1    1.45    3.35
   3  -1   1    1.24    2.50
  -3   1  -1   -0.34    2.90
   3   1   1    1.58    3.04
   3   1   1    1.26    2.26
   4  -1   1   65.10    6.28
  -4  -1  -1   75.82    7.59
   4   1   1   86.43    6.73
  -4   1  -1   64.57    7.41
   4   1   1   68.77    7.71
  -5  -1  -1  105.64    8.57
   5  -1   1   95.42    7.82
  -5   1  -1   98.04    8.78
   6  -2  -1    2.53    4.13
  -6  -2   1    9.62    4.86
  -6   2   1   -3.80    4.06
   6   2  -1   -1.26    4.17
  -5  -2   1    0.22    3.21
   5  -2  -1    2.18    2.35
  -5   2   1   -0.63    3.41
   5   2  -1   -1.27    2.95
   4  -2  -1 1169.61   34.69
   4  -2  -1 1191.12   37.61
  -4  -2   1 1184.16   37.76
   4   2  -1 1192.09   37.64
   4   2  -1 1154.86   38.11
  -4   2   1 1206.37   38.39
  -3  -2   1  237.69   11.17
  -3  -2   1  231.84   10.75
   3  -2  -1  235.62   12.96
   3  -2  -1  248.20    9.81
   3  -2  -1  240.10   11.81
  -3   2   1  221.47   12.75
   3   2  -1  264.47   11.95
  -3   2   1  238.39   11.46
   3   2  -1  247.17   11.31
  -2  -2   1  681.23   22.09
  -2  -2   1  684.31   22.03
   2  -2  -1  679.17   21.17
   2  -2  -1  650.39   22.31
   2  -2  -1  687.61   22.17
  -2   2   1  670.15   22.00
  -2   2   1  687.33   22.45
   2   2  -1  701.76   22.39
   2   2  -1  678.14   22.24
   1  -2  -1   -0.34    1.13
   1  -2  -1    4.93    1.51
  -1  -2   1    0.36    1.12
  -1  -2   1   -0.43    1.38
   1   2  -1    0.18    1.13
  -1   2   1    1.16    1.02
  -1   2   1    0.05    0.81
   1   2  -1    0.32    1.22
  -1   2   1   -0.55    1.17
   0  -2  -1  190.78    5.83
   0  -2  -1  183.77    5.64
   0  -2   1  183.73    7.71
   0  -2   1  185.52    8.34
   0  -2  -1  188.51    7.79
   0   2  -1  189.56    7.95
   0   2   1  185.55    7.74
   0   2  -1  173.54    8.65
   0   2   1  178.47    5.72
   0   2   1  194.81    5.58
   1  -2   1  355.30   13.94
   1  -2   1  373.72   13.71
  -1  -2  -1  372.07   12.20
  -1  -2  -1  356.25   11.83
   1   2   1  351.79   11.60
   1   2   1  363.19   12.03
   1   2   1  375.93   13.08
  -1   2  -1  360.21   13.86
  -1   2  -1  358.39   13.59
  -2  -2  -1  766.90   24.02
   2  -2   1  731.61   30.48
  -2  -2  -1  674.92   24.99
   2  -2   1  717.59   25.10
   2   2   1  747.52   23.96
   2   2   1  736.00   23.19
  -2   2  -1  772.22   27.50
  -2   2  -1  760.74   25.44
  -3  -2  -1   12.46    3.36
   3  -2   1    8.29    3.15
   3  -2   1   16.33    4.58
  -3   2  -1   12.15    3.76
   3   2   1   14.71    3.20
   3   2   1   20.75    4.28
   4  -2   1   84.94    7.06
  -4  -2  -1   69.82    7.28
  -4   2  -1   54.11    6.91
   4   2   1   70.02    7.76
   5  -2   1    4.45    4.10
  -5  -2  -1    2.37    4.02
   5   2   1   -4.46    4.82
  -5   2  -1   -0.16    4.16
   5   2   1   -4.66    3.29
  -6  -3   1   -6.50    4.49
   6  -3  -1    5.74    4.35
   6  -3  -1   -0.02    3.44
   6   3  -1   -0.87    3.94
  -6   3   1    6.13    5.37
   5  -3  -1   89.51    6.27
  -5  -3   1   90.95    8.20
  -5   3   1   87.42    7.98
   5   3  -1  108.95    8.28
   4  -3  -1  192.23   10.57
   4  -3  -1  193.03    8.91
  -4  -3   1  191.31   10.53
  -4   3   1  183.57   10.92
   4   3  -1  186.85   10.26
   4   3  -1  189.03   10.79
  -3  -3   1  324.03   13.04
   3  -3  -1  321.67   12.05
   3  -3  -1  284.67   13.63
   3   3  -1  303.18   12.92
  -3   3   1  325.17   13.63
   3   3  -1  300.25   13.19
  -3   3   1  262.11   14.40
   2  -3  -1 1183.48   35.11
  -2  -3   1 1164.04   35.06
   2  -3  -1 1161.59   34.77
   2  -3  -1 1142.93   35.60
  -2  -3   1 1155.06   35.02
   2   3  -1 1166.75   35.18
  -2   3   1 1179.83   35.21
   2   3  -1 1179.10   35.39
  -2   3   1 1184.88   35.56
  -1  -3   1  132.96    6.37
   1  -3  -1  147.80    5.88
   1  -3  -1  136.07    6.69
   1  -3  -1  133.52    5.98
  -1  -3   1  125.31    6.38
   1   3  -1  141.25    6.83
   1   3  -1  136.24    6.42
  -1   3   1  134.76    6.58
  -1   3   1  134.46    5.77
  -1   3   1  127.85    5.73
   0  -3   1 5932.53  161.93
   0  -3   1 6094.00  162.38
   0  -3  -1 6518.47  158.57
   0  -3  -1 5859.37  161.82
   0   3  -1 5951.18  162.31
   0   3   1 5786.81  161.67
   0   3  -1 5905.52  161.95
   1  -3   1    4.77    2.68
  -1  -3  -1    6.27    1.43
   1  -3   1    7.45    2.42
  -1   3  -1    8.26    2.66
   1   3   1    4.03    1.63
   1   3   1    8.24    1.52
  -1   3  -1    4.20    2.37
  -2  -3  -1 1454.72   41.95
   2  -3   1 1432.28   43.66
   2  -3   1 1413.42   44.60
  -2   3  -1 1383.74   43.61
  -2   3  -1 1406.14   48.61
   2   3   1 1444.62   41.21
   2   3   1 1443.58   41.92
   2   3   1 1479.74   41.88
   3  -3   1   30.24    4.76
  -3  -3  -1   32.18    4.60
   3   3   1   35.64    4.80
   3   3   1   38.84    4.43
  -3   3  -1   31.63    5.30
   4  -3   1   70.23    6.69
  -4  -3  -1   75.58    7.17
   4   3   1   71.22    6.13
  -4   3  -1   74.79    8.09
   4   3   1   64.54    7.14
   4   3   1   59.73    5.46
   5  -3   1   24.82    5.15
  -5  -3  -1   16.15    5.03
  -5   3  -1   34.26    5.97
   5   3   1   25.68    4.53
   5  -4  -1   29.14    7.25
   5  -4  -1   30.67    5.50
  -5  -4   1   35.31    5.53
  -5   4   1   40.85    6.31
   5   4  -1   36.53    5.07
  -4  -4   1   43.46    5.58
   4  -4  -1   36.04    5.30
   4  -4  -1   32.75    4.21
   4   4  -1   31.91    5.48
   4   4  -1   44.65    4.93
  -4   4   1   31.40    5.34
  -3  -4   1  787.17   25.90
   3  -4  -1  803.16   25.54
   3   4  -1  804.33   26.34
  -3   4   1  755.37   26.80
   3   4  -1  798.19   26.20
  -3   4   1  776.85   26.76
  -2  -4   1    1.27    1.82
  -2  -4   1    2.34    2.38
  -2  -4   1    0.69    0.93
   2  -4  -1   -1.74    2.30
   2  -4  -1   -0.76    1.72
   2  -4  -1    2.40    1.97
   2   4  -1    3.13    1.97
  -2   4   1    0.26    1.87
  -2   4   1    5.44    2.26
   2   4  -1   -0.20    1.71
   1  -4  -1 1605.01   45.30
   1  -4  -1 1586.46   43.29
  -1  -4   1 1597.11   44.55
  -1  -4   1 1517.69   44.47
   1  -4  -1 1569.80   43.66
  -1   4   1 1578.10   43.47
  -1   4   1 1500.48   43.22
   1   4  -1 1567.54   44.85
   1   4  -1 1448.78   45.83
  -1   4   1 1448.19   45.34
   0  -4  -1   46.13    1.64
   0  -4   1   43.53    4.11
   0  -4   1   35.00    4.04
   0  -4  -1   31.92    4.40
   0  -4  -1   34.81    1.58
   0   4  -1   37.79    4.16
   0   4  -1   52.27    4.10
   0   4   1   40.88    3.70
   1  -4   1 3162.05   86.30
  -1  -4  -1 3085.70   82.75
  -1  -4  -1 3019.91   85.32
   1  -4   1 3068.87   86.65
  -1  -4  -1 3010.01   82.31
   1   4   1 3080.86   84.92
   1   4   1 2989.16   82.11
  -1   4  -1 3046.94   86.12
   1   4   1 3110.29   82.40
  -1   4  -1 3126.96   86.74
   2  -4   1  241.60   12.39
  -2  -4  -1  250.45    9.92
   2  -4   1  228.93   11.49
  -2  -4  -1  234.82   11.56
  -2   4  -1  245.08   11.80
   2   4   1  258.65    9.49
   2   4   1  234.17   11.13
  -2   4  -1  247.90   12.00
   2   4   1  237.02    9.71
   3  -4   1   -1.17    2.69
  -3  -4  -1   -0.04    2.35
   3   4   1    3.76    2.43
   3   4   1   -0.09    1.98
  -3   4  -1   -4.88    2.89
   3   4   1    0.31    2.96
  -4  -4  -1    0.92    3.50
   4  -4   1   -1.73    3.04
   4   4   1    1.76    2.70
   4   4   1    8.46    2.71
   4   4   1   10.68    4.49
  -4   4  -1    6.85    3.97
  -5  -4  -1   25.88    5.30
   5  -4   1   19.83    5.12
  -5   4  -1   14.11    5.04
   5   4   1   11.99    4.01
  -5  -5   1  157.44    9.91
   5  -5  -1  155.55    8.79
   5  -5  -1  151.99    9.92
   5   5  -1  159.78    9.83
  -5   5   1  156.68   10.27
   4  -5  -1    2.22    3.34
   4  -5  -1    4.90    2.98
  -4  -5   1    4.83    3.26
   4   5  -1    4.38    2.93
  -4   5   1    1.48    3.00
   4   5  -1    5.07    4.12
   3  -5  -1  434.56   23.59
  -3  -5   1  554.41   19.05
   3  -5  -1  533.76   19.07
   3   5  -1  530.55   19.10
   3   5  -1  550.02   19.47
  -3   5   1  537.80   20.01
  -3   5   1  540.11   20.07
  -2  -5   1   28.73    3.85
   2  -5  -1   26.42    4.18
   2  -5  -1   33.55    3.98
  -2  -5   1   26.33    2.64
   2  -5  -1   25.59    3.91
  -2  -5   1   25.99    3.70
   2   5  -1   25.38    3.57
   2   5  -1   28.77    3.84
  -2   5   1   29.25    4.01
  -2   5   1   26.91    3.88
   1  -5  -1  191.98    7.50
  -1  -5   1  188.56    8.69
   1  -5  -1  173.94    7.70
  -1  -5   1  185.54    8.30
   1  -5  -1  187.50    9.11
   1   5  -1  180.96    8.70
   1   5  -1  178.28   11.52
  -1   5   1  173.57    7.41
  -1   5   1  187.82    7.49
   0  -5  -1  791.66   25.29
   0  -5   1  782.82   25.17
   0  -5  -1  794.32   21.39
   0  -5  -1  732.34   21.38
   0  -5   1  754.69   24.81
   0   5   1  789.25   24.99
   0   5  -1  770.20   24.71
   0   5  -1  793.07   25.41
  -1  -5  -1  206.96    6.75
  -1  -5  -1  197.96    6.65
  -1  -5  -1  207.28    9.35
   1  -5   1  194.13    9.72
   1   5   1  184.61    5.95
   1   5   1  208.53    6.22
  -1   5  -1  199.57    9.86
   1   5   1  200.95    9.13
  -2  -5  -1  119.94    6.02
   2  -5   1  122.81    7.91
  -2  -5  -1  115.44    5.90
   2   5   1  115.20    6.56
   2   5   1  107.48    5.63
  -2   5  -1  122.20    8.49
  -2   5  -1  100.61    8.00
   2   5   1  116.17    5.93
   3  -5   1   10.36    3.42
  -3  -5  -1   12.53    3.23
   3   5   1   12.83    2.88
  -3   5  -1    9.78    3.80
   3   5   1   12.99    2.76
   3   5   1   12.52    3.22
   4  -5   1   64.32    7.05
  -4  -5  -1   57.36    6.27
   4   5   1   57.01    5.12
   4   5   1   52.28    6.04
  -4   5  -1   58.42    7.10
   4   5   1   55.14    5.47
  -5  -5  -1   93.91    8.47
   5   5   1   87.28    7.40
  -5   5  -1   86.97    8.72
   5  -6  -1    1.01    3.12
   5  -6  -1    1.59    3.75
  -5  -6   1    6.45    3.73
  -5   6   1    1.47    3.95
   5   6  -1    1.42    3.51
   4  -6  -1  481.66   18.47
   4  -6  -1  499.08   19.34
  -4  -6   1  487.03   19.76
   4   6  -1  480.15   18.88
   4   6  -1  475.27   19.11
  -4   6   1  529.14   19.99
   3  -6  -1  347.66   14.28
   3  -6  -1  332.78   19.20
  -3  -6   1  342.87   13.63
  -3   6   1  308.49   14.04
   3   6  -1  337.04   13.87
   3   6  -1  329.12   13.68
  -3   6   1  335.40   14.27
  -2  -6   1  247.38    9.22
   2  -6  -1  228.34   10.85
  -2  -6   1  237.17   10.54
  -2  -6   1  249.56   10.61
   2  -6  -1  248.89   10.63
   2  -6  -1  235.67   11.13
   2   6  -1  242.70   10.77
  -2   6   1  241.93   10.67
  -2   6   1  233.39   10.69
   2   6  -1  244.85   10.37
   1  -6  -1   48.10    4.03
   1  -6  -1   44.56    3.62
  -1  -6   1   41.80    7.26
   1  -6  -1   46.78    4.82
  -1  -6   1   46.67    4.54
   1   6  -1   43.29    4.06
  -1   6   1   51.18    3.67
  -1   6   1   45.40    3.74
   1   6  -1   40.84    4.35
   0  -6  -1  289.71    8.99
   0  -6   1  269.42   11.73
   0  -6  -1  286.87    8.87
   0  -6  -1  295.02   12.34
   0   6  -1  288.06   11.84
   0   6  -1  275.12   14.31
   0   6   1  280.70   12.16
   1  -6   1  898.39   30.81
  -1  -6  -1  973.51   26.44
   1  -6   1  951.81   30.68
  -1  -6  -1  915.58   26.17
  -1  -6  -1  968.65   29.98
  -1   6  -1  960.40   31.14
  -1   6  -1  938.50   30.50
   1   6   1  962.00   29.59
  -2  -6  -1   78.71    4.70
   2  -6   1   77.46    6.81
   2   6   1   85.42    6.20
   2   6   1   92.98    5.89
  -2   6  -1   80.07    6.99
   2   6   1   84.77    4.77
  -2   6  -1   71.89    7.07
   3  -6   1    9.76    3.72
  -3  -6  -1   14.55    3.22
   3   6   1   18.53    3.47
   3   6   1    7.89    2.44
   3   6   1   11.70    2.91
  -3   6  -1    9.94    4.11
  -4  -6  -1   47.55    5.40
   4  -6   1   34.05    5.31
   4   6   1   35.75    3.89
   4   6   1   31.93    5.07
  -4   6  -1   28.01    5.72
   4   6   1   42.40    4.65
  -5  -6  -1    3.57    4.48
  -5   6  -1   -1.50    4.47
   5  -7  -1   37.72    5.31
  -5  -7   1   32.34    5.30
   5  -7  -1   41.56    6.45
   5   7  -1   35.05    5.31
  -5   7   1   35.71    6.13
   4  -7  -1  107.94    7.88
   4  -7  -1  103.98    7.90
  -4  -7   1  108.84    9.42
   4   7  -1  115.43    8.55
  -4   7   1  105.70    8.12
   4   7  -1  108.43    7.89
  -3  -7   1   19.51    2.36
  -3  -7   1   27.03    4.15
   3  -7  -1   23.44    4.35
   3  -7  -1   24.66    4.52
   3   7  -1   23.46    3.84
   3   7  -1   25.13    4.14
  -3   7   1   19.03    4.67
  -3   7   1   17.56    3.55
   2  -7  -1  203.05   10.55
  -2  -7   1  216.57    9.76
  -2  -7   1  220.83    8.81
   2  -7  -1  202.19    9.57
  -2   7   1  186.15    9.66
   2   7  -1  204.03    9.58
   2   7  -1  215.31    9.85
  -2   7   1  207.29    9.75
  -1  -7   1    2.53    2.12
  -1  -7   1   -0.46    2.49
   1  -7  -1    3.56    2.55
   1  -7  -1    4.65    1.75
   1  -7  -1    1.84    3.93
   1   7  -1   -0.03    2.00
   1   7  -1    3.81    2.38
  -1   7   1    4.23    1.81
  -1   7   1    4.78    1.98
   0  -7   1 1681.56   48.36
   0  -7  -1 1618.29   48.60
   0  -7   1 1640.05   48.40
   0  -7  -1 1599.32   44.41
   0  -7  -1 1582.66   44.61
   0   7   1 1621.37   48.31
   0   7   1 1708.96   43.49
   0   7   1 1507.39   43.40
   0   7  -1 1617.14   48.41
   0   7  -1 1679.72   47.87
   1  -7   1   65.42    6.27
  -1  -7  -1   64.19    5.72
  -1  -7  -1   67.42    3.36
  -1   7  -1   59.58    5.79
  -1   7  -1   60.57    6.27
   1   7   1   65.92    5.71
  -2  -7  -1  386.75   12.73
   2  -7   1  385.55   16.23
   2   7   1  378.23   14.43
  -2   7  -1  406.20   16.89
  -2   7  -1  368.08   16.60
  -3  -7  -1  109.34    6.36
   3  -7   1  101.69    7.91
   3   7   1   92.94    6.32
   3   7   1  103.31    5.83
  -3   7  -1   91.10    8.73
   3   7   1   96.51    6.29
   4  -7   1   18.94    4.65
  -4  -7  -1   17.11    4.00
   4   7   1   14.23    3.25
   4   7   1   27.70    3.87
   4   7   1   24.52    5.71
  -4   7  -1   14.38    4.93
   5  -8  -1    5.65    4.30
  -5  -8   1   12.86    4.55
   5  -8  -1    5.20    4.99
   5   8  -1   13.39    4.07
  -5   8   1    6.53    4.58
  -4  -8   1   43.28    5.67
   4  -8  -1   46.20    5.91
   4  -8  -1   42.90    5.75
  -4   8   1   40.27    5.50
   4   8  -1   43.14    5.68
   4   8  -1   43.69    5.31
   3  -8  -1   64.20    6.30
   3  -8  -1   64.65    6.32
  -3  -8   1   62.14    6.12
  -3   8   1   61.62    6.68
   3   8  -1   58.98    5.82
  -3   8   1   59.60    6.08
   3   8  -1   62.99    6.22
   2  -8  -1    3.59    2.73
  -2  -8   1    2.55    2.08
   2  -8  -1    2.08    2.60
  -2  -8   1    1.46    2.33
  -2   8   1    1.31    2.03
   2   8  -1    2.77    2.49
   2   8  -1    1.59    2.39
  -2   8   1    1.14    2.83
   1  -8  -1  285.56   13.24
   1  -8  -1  281.40   10.73
  -1  -8   1  293.58   12.19
  -1  -8   1  276.28   11.87
   1  -8  -1  271.19   11.20
   1   8  -1  294.26   12.18
   1   8  -1  288.73   11.64
  -1   8   1  286.24   10.69
  -1   8   1  294.70   10.68
   0  -8  -1   29.63    3.04
   0  -8   1   29.67    4.38
   0  -8  -1   33.07    2.78
   0  -8  -1   28.74    4.59
   0   8  -1   28.20    4.28
   0   8   1   31.37    1.80
   0   8  -1   31.85    4.20
   0   8   1   27.73    1.76
  -1  -8  -1  582.17   16.68
  -1  -8  -1  555.76   20.32
   1  -8   1  596.69   21.13
  -1   8  -1  534.96   20.80
   1   8   1  590.94   20.38
  -1   8  -1  542.90   20.53
   2  -8   1  135.26    8.97
  -2  -8  -1  144.13    8.06
  -2  -8  -1  131.56    6.21
  -2  -8  -1  143.84    6.22
  -2   8  -1  142.48    9.30
  -2   8  -1  136.14   10.43
   2   8   1  141.52    8.21
   2   8   1  147.97    5.42
   3  -8   1   -0.29    3.50
  -3  -8  -1   -0.49    2.31
   3   8   1   -1.65    2.73
   3   8   1    0.25    2.00
  -3   8  -1    2.20    3.38
   3   8   1   -0.96    2.33
  -4  -8  -1    0.19    3.36
   4  -8   1    2.23    4.22
   4   8   1   12.06    3.08
   4   8   1   -2.57    4.24
  -4   8  -1    4.77    4.38
   4  -9  -1   34.21    5.35
  -4  -9   1   30.85    4.86
   4   9  -1   26.65    4.52
   4   9  -1   25.38    5.05
  -4   9   1   22.17    5.02
   3  -9  -1  223.29   11.07
  -3  -9   1  219.33    9.00
  -3  -9   1  233.22   10.65
   3  -9  -1  218.06   11.69
   3   9  -1  208.49   10.43
  -3   9   1  239.85   12.45
  -3   9   1  214.12   11.05
   3   9  -1  213.24   10.50
   2  -9  -1  102.40    6.52
   2  -9  -1   84.48    7.44
  -2  -9   1  106.95    6.59
  -2  -9   1   91.99    6.81
  -2   9   1   97.96    6.60
   2   9  -1   95.12    6.51
   2   9  -1   99.79    6.78
  -2   9   1   94.96    7.09
  -1  -9   1   13.29    3.19
   1  -9  -1    7.78    2.34
   1  -9  -1    8.45    3.23
  -1  -9   1    8.23    2.94
   1   9  -1   10.63    3.04
   1   9  -1   12.05    3.04
  -1   9   1    8.52    2.26
  -1   9   1   13.12    2.46
   0  -9   1   47.07    5.21
   0  -9  -1   39.92    3.69
   0  -9  -1   38.71    3.30
   0   9   1   42.72    2.18
   0   9  -1   31.11    4.68
   0   9   1   38.71    2.14
   0   9  -1   34.72    4.32
  -1  -9  -1   24.73    2.69
   1  -9   1   27.58    4.70
  -1  -9  -1   14.32    3.44
  -1   9  -1   21.75    4.40
  -1   9  -1   34.48    4.96
   2  -9   1   -3.47    2.93
  -2  -9  -1    0.63    1.80
  -2  -9  -1   -3.43    2.63
   2   9   1    4.58    3.17
  -2   9  -1    1.95    3.09
  -3  -9  -1   -5.68    2.88
   3  -9   1   -3.33    3.71
   3   9   1   -2.32    2.11
  -3   9  -1    2.96    3.69
   3   9   1    2.16    1.87
   4  -9   1   35.78    5.82
  -4   9  -1   19.42    6.06
   4   9   1   25.05    3.53
   4 -10  -1  121.51    8.55
  -4 -10   1   99.50    8.09
   4 -10  -1   96.81    9.20
   4  10  -1  112.22    7.79
  -4  10   1  115.94    8.41
  -3 -10   1  180.07    8.29
  -3 -10   1  168.11    9.21
   3 -10  -1  178.65    9.75
   3 -10  -1  196.95   11.61
  -3  10   1  180.95   11.35
   3  10  -1  164.15    8.98
  -3  10   1  176.13    9.78
   3  10  -1  176.43    9.24
  -2 -10   1   65.95    5.59
   2 -10  -1   66.00    6.75
   2 -10  -1   68.13    5.94
  -2 -10   1   59.93    6.16
  -2  10   1   65.35    5.74
  -2  10   1   66.35    5.92
   2  10  -1   60.99    5.58
   1 -10  -1    9.81    3.41
  -1 -10   1   12.77    5.85
  -1 -10   1   13.23    3.67
   1 -10  -1   16.96    2.98
  -1  10   1    8.70    2.25
   1  10  -1   19.72    3.50
  -1  10   1   10.16    2.52
   1  10  -1   11.62    3.15
   0 -10  -1   21.25    3.09
   0 -10   1   28.02    4.87
   0 -10  -1   22.08    4.20
   0 -10  -1   27.26    2.84
   0  10  -1   31.05    4.61
   0  10   1   29.46    1.89
   0  10   1   23.50    1.81
   0  10  -1   21.46    3.77
  -1 -10  -1  306.43   13.53
  -1 -10  -1  269.33    9.31
   1 -10   1  270.69   18.15
  -1 -10  -1  307.94    9.74
  -1  10  -1  290.03   13.34
  -1  10  -1  312.90   13.62
  -2 -10  -1    3.77    1.98
  -2 -10  -1    0.13    3.16
   2 -10   1    2.16    3.71
  -2  10  -1    3.21    3.16
  -3 -10  -1   16.00    3.42
  -3  10  -1   15.88    4.68
   3  10   1   14.40    1.96
   3  10   1   14.01    1.68
  -4 -11   1   24.10    5.33
   4 -11  -1   27.26    5.12
  -4  11   1   23.53    5.12
   4  11  -1   22.74    4.31
  -3 -11   1    0.00    3.45
   3 -11  -1    5.70    3.64
   3 -11  -1   -4.76    3.50
  -3 -11   1   -0.16    2.64
  -3  11   1    1.11    4.76
   3  11  -1   -0.97    2.96
  -3  11   1   -0.41    2.98
   2 -11  -1   16.00    3.58
   2 -11  -1   11.67    4.07
  -2 -11   1   13.86    3.88
  -2  11   1    8.63    3.68
   2  11  -1   10.31    3.72
   2  11  -1   16.57    3.48
   1 -11  -1    1.90    3.52
   1 -11  -1    1.98    2.39
  -1 -11   1    3.27    3.09
  -1 -11   1    4.17    2.75
   1  11  -1    0.45    2.67
  -1  11   1   -2.84    2.06
  -1  11   1    0.22    1.81
   1  11  -1   -1.97    2.65
   0 -11   1  261.51   13.00
   0 -11  -1  254.57   13.13
   0 -11   1  265.62   12.33
   0 -11  -1  247.86    9.33
   0  11  -1  267.04   12.09
   0  11  -1  246.70   11.49
   0  11   1  263.82    7.47
   1 -11   1   89.90    7.92
  -1 -11  -1   82.28    7.42
  -1  11  -1   87.53    7.17
  -1  11  -1   67.38    7.75
   2 -11   1   78.32    7.96
  -2 -11  -1   86.90    7.30
  -2  11  -1   77.41    7.79
   3 -11   1   58.85    6.79
  -3  11  -1   46.81    7.18
   3 -12  -1   -0.16    3.82
  -3 -12   1   -0.38    3.79
  -3 -12   1    1.28    5.13
  -3  12   1    1.67    3.26
   3  12  -1    2.33    3.07
  -2 -12   1    3.19    3.21
  -2 -12   1   -3.02    3.15
   2 -12  -1    4.14    3.35
   2 -12  -1    2.96    3.74
  -2  12   1    4.76    2.68
   2  12  -1    2.92    3.07
   2  12  -1    9.75    3.21
  -1 -12   1   98.22    7.53
   1 -12  -1  100.84    6.38
  -1 -12   1   92.96    7.96
   1 -12  -1  100.56   13.50
   1  12  -1   96.01    6.99
  -1  12   1   96.09    5.62
   1  12  -1  119.71    7.42
  -1  12   1  103.53    5.63
   0 -12  -1   29.19    5.30
   0 -12   1   30.03    5.16
   0 -12   1   29.81    5.34
   0 -12  -1   32.01    3.27
   0  12  -1   28.90    4.43
   0  12  -1   28.17    4.44
   1 -12   1   34.32    5.85
   1 -12   1   41.39    5.87
  -1 -12  -1   35.27    5.70
  -1 -12  -1   46.42    3.49
  -1  12  -1   32.02    5.04
  -2 -12  -1   46.03    5.60
   2 -12   1   48.73    6.47
  -2  12  -1   41.51    5.70
  -3  12  -1    2.02    3.96
  -3 -13   1   43.22    5.09
   3 -13  -1   47.95    6.18
  -3  13   1   52.19    5.83
   3  13  -1   56.40    5.74
  -2 -13   1   61.46    6.28
   2 -13  -1   55.59    6.27
  -2 -13   1   63.93    7.12
  -2  13   1   63.61    5.82
   2  13  -1   64.11    6.09
  -1 -13   1   -1.45    3.55
  -1 -13   1    2.54    3.65
   1 -13  -1    2.49    4.39
   1 -13  -1    1.08    2.95
   1  13  -1    2.97    2.98
  -1  13   1    2.07    2.07
   0 -13  -1   -3.43    4.02
   0 -13   1    4.77    4.26
   0 -13   1   -3.57    3.72
   0 -13  -1   -0.85    2.41
   0  13  -1    8.84    3.41
   1 -13   1   -6.84    3.81
  -1  13  -1    2.00    3.16
   2 -13   1   10.40    4.62
  -2 -13  -1    4.26    4.57
  -2  13  -1   -5.93    6.05
  -2 -14   1    7.02    4.35
  -2  14   1    5.31    2.99
   2  14  -1    5.47    3.26
  -1 -14   1    9.69    4.56
  -1 -14   1    4.96    3.64
   1  14  -1    5.61    3.22
   0 -14   1   29.52    5.33
   0  14  -1   20.75    4.26
   1 -14   1   58.95    6.86
  -1 -14  -1   61.05    7.10
  -1  14  -1   74.79    7.48
  -6   0   2    3.16    3.80
   6   0  -2   -2.86    4.14
  -5   0   2    2.87    5.65
   5   0  -2    3.23    3.19
   4   0  -2   32.83    4.88
   4   0  -2   33.77    2.95
  -4   0   2   30.81    4.81
   3   0  -2   -1.64    2.33
  -3   0   2   -2.45    1.99
   3   0  -2    2.43    3.03
  -3   0   2   -4.14    2.50
   2   0  -2    6.51    2.47
  -2   0   2    8.03    2.20
  -2   0   2    8.32    1.87
  -2   0   2    6.59    2.49
   2   0  -2    5.36    2.43
  -1   0   2    0.08    1.22
   1   0  -2   -1.81    1.62
   1   0  -2   -0.62    1.36
   0   0  -2 9853.93  264.12
   0   0  -2 9824.80  264.41
   0   0   2 9999.00  264.35
   1   0   2    2.67    2.24
  -1   0  -2    2.44    1.98
   1   0   2    2.41    1.97
  -1   0  -2    2.30    2.12
   2   0   2 3520.27   98.85
  -2   0  -2 3593.65   98.93
   2   0   2 3433.74   97.65
   3   0   2    1.14    5.04
  -3   0  -2   -1.78    3.26
   3   0   2   -1.06    2.50
   4   0   2  291.88   13.41
  -4   0  -2  288.14   14.18
   6  -1  -2    5.58    3.94
  -6  -1   2    3.26    4.32
   6   1  -2    3.55    4.34
  -6   1   2    3.65    4.04
   5  -1  -2  704.32   26.03
  -5  -1   2  748.26   26.43
  -5   1   2  743.83   26.58
   5   1  -2  710.96   26.04
  -4  -1   2   22.21    4.31
   4  -1  -2   26.98    3.11
   4  -1  -2   20.04    4.18
  -4   1   2   25.96    4.47
   4   1  -2   22.88    4.16
   3  -1  -2 3348.61   94.74
   3  -1  -2 3296.76   94.74
  -3  -1   2 3382.94   94.62
   3  -1  -2 3378.46   91.71
  -3   1   2 3380.84   94.69
  -3   1   2 3379.53   93.94
   3   1  -2 3438.77   94.97
   3   1  -2 3294.57   94.74
  -2  -1   2 1124.29   34.01
   2  -1  -2 1113.63   32.88
  -2  -1   2 1124.00   33.95
   2  -1  -2 1145.13   33.90
   2  -1  -2 1069.35   33.71
  -2  -1   2 1144.79   31.92
  -2   1   2 1062.20   33.36
  -2   1   2 1117.54   32.65
  -2   1   2 1063.84   33.39
   2   1  -2 1085.60   33.82
   2   1  -2 1116.76   34.33
   1  -1  -2  302.71   11.07
  -1  -1   2  297.75   11.74
  -1  -1   2  318.54   12.15
   1  -1  -2  328.13   11.64
  -1   1   2  320.41   12.13
   1   1  -2  311.78   12.28
  -1   1   2  307.37   11.21
  -1   1   2  311.59   11.21
   1   1  -2  310.00   11.74
   0  -1  -2 3017.11   84.77
   0  -1   2 3153.88   86.11
   0  -1   2 3164.93   86.44
   0   1  -2 3118.35   86.47
   0   1  -2 3073.34   85.96
   0   1   2 3107.42   85.04
   0   1   2 3091.41   84.82
   1  -1   2  896.87   28.79
  -1  -1  -2  886.14   27.56
   1  -1   2  907.86   28.60
  -1  -1  -2  903.77   27.99
   1   1   2  858.91   27.65
  -1   1  -2  872.05   28.49
  -1   1  -2  919.53   29.08
   1   1   2  905.08   27.34
   2  -1   2    4.86    3.21
  -2  -1  -2    0.94    2.54
   2  -1   2    1.69    2.21
   2   1   2   -0.47    2.00
   2   1   2   -2.67    2.52
  -2   1  -2    1.76    2.77
   3  -1   2  415.22   16.34
  -3  -1  -2  422.99   16.80
   3  -1   2  372.98   17.02
   3   1   2  402.54   15.55
   3   1   2  359.58   16.38
  -3   1  -2  410.51   17.45
   4  -1   2  322.07   14.50
  -4  -1  -2  332.62   15.00
   4   1   2  316.55   13.85
  -4   1  -2  308.64   15.33
   4   1   2  266.45   21.87
  -6  -2   2   25.60    5.22
   6  -2  -2   27.64    5.40
  -6   2   2   20.69    5.04
   5  -2  -2  112.78    6.09
  -5  -2   2  104.89    8.09
   5  -2  -2   92.65    8.01
  -5   2   2   89.14    7.94
   5   2  -2   92.09    7.91
   4  -2  -2    4.03    2.23
  -4  -2   2    8.06    3.08
   4  -2  -2    9.43    3.42
   4   2  -2    4.76    3.14
  -4   2   2    2.03    2.83
   3  -2  -2 1898.50   53.58
  -3  -2   2 1871.08   55.43
   3  -2  -2 1926.96   55.61
  -3  -2   2 1914.65   55.73
   3  -2  -2 1839.34   55.73
   3   2  -2 1750.49   56.28
   3   2  -2 1916.88   56.06
  -3   2   2 1950.01   55.87
  -3   2   2 1890.59   55.07
   2  -2  -2 1937.68   56.67
  -2  -2   2 1979.94   57.30
  -2  -2   2 2055.47   57.60
   2  -2  -2 1915.68   56.74
   2  -2  -2 2013.90   56.53
  -2   2   2 2006.58   56.23
   2   2  -2 2053.43   57.88
   2   2  -2 1926.14   56.97
  -2   2   2 1963.85   56.33
  -2   2   2 1969.73   56.57
   0  -2   2 1094.75   33.98
   0  -2  -2 1083.34   31.31
   0  -2   2 1100.84   33.72
   0  -2  -2 1096.90   31.70
   0   2   2 1105.43   31.39
   0   2  -2 1116.09   33.60
   0   2   2 1063.56   31.33
   0   2   2 1097.37   34.08
   0   2  -2 1117.24   34.08
  -1  -2  -2 1531.60   44.38
   1  -2   2 1546.09   46.70
   1  -2   2 1358.98   49.13
   1   2   2 1635.82   44.19
  -1   2  -2 1619.37   52.99
   1   2   2 1582.14   44.63
  -1   2  -2 1581.30   47.07
   2  -2   2  207.68   10.65
  -2  -2  -2  212.65   10.06
   2  -2   2  235.99   13.31
  -2   2  -2  206.20   12.40
   2   2   2  217.72    9.50
   3  -2   2   -0.61    2.79
  -3  -2  -2    2.06    3.19
   3   2   2    7.07    3.75
   3   2   2    6.89    2.60
  -3   2  -2    3.71    3.98
  -4  -2  -2   13.29    4.59
   4  -2   2    5.94    3.68
   4   2   2   11.57    3.48
   4   2   2    2.63    5.51
  -4   2  -2   10.30    4.85
   6  -3  -2  107.51    6.66
   6  -3  -2  115.15    9.04
  -6  -3   2   94.05    8.62
   6   3  -2  106.49    8.96
  -6   3   2  105.43   11.51
   5  -3  -2  181.93   10.65
   5  -3  -2  177.19    8.67
  -5  -3   2  174.88   10.62
  -5   3   2  167.86   10.77
   5   3  -2  179.82   10.49
   4  -3  -2  351.30   13.36
  -4  -3   2  347.18   14.87
   4  -3  -2  339.43   15.22
  -4   3   2  352.82   15.18
   4   3  -2  343.49   15.13
   3  -3  -2  734.48   24.38
   3  -3  -2  729.38   23.42
  -3  -3   2  739.15   30.92
  -3   3   2  691.38   23.90
   3   3  -2  636.84   30.06
  -3   3   2  724.78   24.47
   3   3  -2  716.37   24.92
   2  -3  -2 3701.98  103.39
   2  -3  -2 3768.63  103.67
   2  -3  -2 3746.35  103.71
  -2  -3   2 3841.61  104.50
  -2  -3   2 3609.83  104.10
   2   3  -2 3872.96  105.06
  -2   3   2 3774.15  103.44
  -2   3   2 3860.05  103.03
  -2   3   2 3713.44  103.40
   2   3  -2 3700.61  104.05
   1  -3  -2 1099.41   31.08
   1  -3  -2 1055.31   30.83
  -1  -3   2 1055.71   32.93
  -1  -3   2 1025.13   32.92
   1  -3  -2 1075.04   33.27
  -1   3   2 1072.99   33.02
  -1   3   2 1090.27   30.70
   1   3  -2 1090.36   33.53
  -1   3   2 1050.27   30.52
   1   3  -2 1061.48   32.67
   0  -3   2 2158.84   63.44
   0  -3   2 2236.85   64.04
   0  -3  -2 2193.04   60.09
   0   3  -2 2202.74   63.43
   0   3   2 2192.56   63.39
   0   3  -2 2270.40   64.15
   0   3   2 2197.20   59.80
   0   3   2 2250.32   59.95
   1  -3   2  473.97   18.42
   1  -3   2  510.60   18.66
  -1  -3  -2  469.82   15.65
  -1  -3  -2  482.46   15.88
   1   3   2  478.94   17.88
   1   3   2  484.06   15.13
   1   3   2  495.70   15.65
  -1   3  -2  488.16   18.16
  -1   3  -2  478.52   18.60
   2  -3   2  472.87   18.19
   2  -3   2  422.81   18.27
  -2  -3  -2  472.74   16.62
   2   3   2  453.91   16.47
  -2   3  -2  465.26   18.85
   2   3   2  473.75   15.75
   2   3   2  463.61   17.46
   3  -3   2   10.62    3.46
  -3  -3  -2   21.35    3.87
   3   3   2   13.51    3.64
  -3   3  -2   10.45    3.92
   3   3   2   15.85    4.02
   3   3   2   15.18    3.13
   4  -3   2  382.46   16.66
  -4  -3  -2  387.32   16.16
  -4   3  -2  402.94   17.62
   4   3   2  372.87   16.51
   4   3   2  355.45   15.18
  -6  -4   2   -0.74    4.40
   6  -4  -2   -2.36    3.17
   6  -4  -2    0.79    4.08
  -6   4   2   -2.72    3.78
   6   4  -2    7.72    4.37
   5  -4  -2   33.16    5.40
  -5  -4   2   31.05    4.99
   5  -4  -2   38.92    4.54
  -5   4   2   38.20    5.81
   5   4  -2   34.54    5.73
   4  -4  -2   45.93    5.36
  -4  -4   2   62.23    6.00
   4  -4  -2   52.89    6.04
  -4   4   2   53.63    6.18
   4   4  -2   47.71    5.86
   3  -4  -2  165.67    8.81
   3  -4  -2  176.22    9.37
  -3   4   2  173.44    8.98
  -3   4   2  165.08    8.92
   3   4  -2  164.52    9.35
   3   4  -2  162.24    9.80
   2  -4  -2   26.32    3.92
   2  -4  -2   23.12    3.25
   2  -4  -2   22.23    3.79
  -2  -4   2   20.26    3.90
  -2  -4   2   13.91    3.14
  -2   4   2   12.10    2.84
  -2   4   2   27.30    5.28
   2   4  -2   17.97    3.79
   2   4  -2   16.29    3.25
  -1  -4   2 1457.39   43.32
   1  -4  -2 1432.39   40.59
   1  -4  -2 1424.96   43.39
  -1  -4   2 1397.01   43.26
  -1   4   2 1446.17   40.10
  -1   4   2 1493.32   40.27
  -1   4   2 1445.76   43.24
   1   4  -2 1444.12   43.81
   1   4  -2 1424.82   42.78
   0  -4  -2 1667.59   49.96
   0  -4  -2 1672.10   45.59
   0  -4  -2 1730.96   45.95
   0  -4   2 1641.21   50.22
   0  -4   2 1747.33   50.26
   0   4   2 1652.54   49.69
   0   4  -2 1748.10   50.73
   0   4  -2 1615.50   49.68
   1  -4   2 1366.22   43.63
   1  -4   2 1453.56   43.68
  -1  -4  -2 1389.36   39.45
   1   4   2 1413.09   42.63
   1   4   2 1396.45   38.66
  -1   4  -2 1404.21   43.29
   1   4   2 1450.69   39.24
  -1   4  -2 1398.50   43.92
   2  -4   2 1158.99   36.72
   2   4   2 1129.69   35.41
  -2   4  -2 1142.77   37.41
   2   4   2 1120.79   32.90
   2   4   2 1113.39   33.68
  -3  -4  -2  549.19   19.65
   3  -4   2  622.91   28.85
  -3   4  -2  552.71   22.05
   3   4   2  533.38   19.80
  -4  -4  -2  131.92    9.44
   4  -4   2  126.36    9.61
   4   4   2  155.25    8.27
   4   4   2  136.79    8.97
  -4   4  -2  129.99   11.03
   5  -5  -2  351.14   15.55
  -5  -5   2  355.29   15.40
   5  -5  -2  307.22   13.60
  -5   5   2  334.59   15.59
   5   5  -2  335.87   15.48
  -4  -5   2  386.61   16.33
   4  -5  -2  392.87   15.48
  -4   5   2  374.84   19.23
   4   5  -2  409.56   18.47
   4   5  -2  394.02   17.15
   3  -5  -2 1021.75   32.46
  -3  -5   2 1011.99   27.84
  -3   5   2  989.42   32.26
  -3   5   2 1044.95   32.35
   3   5  -2 1011.15   33.09
   3   5  -2 1030.00   32.84
  -2  -5   2  113.32    7.11
   2  -5  -2  107.28    7.06
  -2  -5   2  104.84    7.22
   2  -5  -2  105.85    6.66
  -2   5   2  105.96    6.17
   2   5  -2  107.18    7.32
  -2   5   2  106.11    6.08
  -2   5   2   98.50    6.93
   2   5  -2  100.57    7.02
  -1  -5   2 1403.42   43.05
  -1  -5   2 1445.06   43.16
   1  -5  -2 1384.50   39.92
   1  -5  -2 1434.87   43.36
   1   5  -2 1425.00   43.46
  -1   5   2 1405.24   42.92
   1   5  -2 1408.32   42.49
  -1   5   2 1443.69   39.42
  -1   5   2 1439.19   39.40
   0  -5   2  929.79   30.83
   0  -5  -2 1012.24   25.45
   0  -5  -2  912.41   30.46
   0  -5  -2  865.89   25.21
   0  -5   2  970.04   30.74
   0   5  -2  928.44   30.32
   0   5  -2  968.47   31.30
   0   5   2  928.75   30.30
   1  -5   2  265.01   12.60
  -1  -5  -2  270.65    8.73
   1  -5   2  238.50   12.55
  -1  -5  -2  256.45    8.59
  -1   5  -2  263.18   12.51
  -1   5  -2  270.57   13.05
   1   5   2  255.38   11.68
   2  -5   2  173.15   10.31
  -2  -5  -2  192.46    8.23
   2   5   2  196.22    7.45
  -2   5  -2  191.16   11.08
   2   5   2  188.24    9.71
   2   5   2  178.99    7.94
  -3  -5  -2  405.85   15.20
   3  -5   2  395.09   17.11
  -3   5  -2  393.07   17.91
   3   5   2  407.22   14.23
   3   5   2  394.61   15.02
   3   5   2  398.06   15.42
  -4  -5  -2   21.28    4.78
   4  -5   2   28.35    5.09
   4   5   2   32.72    4.10
   4   5   2   25.33    4.59
  -4   5  -2   25.51    5.45
   5  -6  -2   50.67    5.73
  -5  -6   2   49.09    6.30
  -5   6   2   51.55    6.71
   5   6  -2   55.42    6.59
  -4  -6   2    1.57    2.96
   4  -6  -2    1.44    3.02
  -4   6   2    1.69    2.77
   4   6  -2    8.15    4.13
   4   6  -2    3.14    3.19
   3  -6  -2  327.78   14.26
  -3  -6   2  346.88   10.69
   3  -6  -2  331.07   13.67
  -3   6   2  312.79   13.80
   3   6  -2  336.27   14.82
  -3   6   2  368.54   14.31
   3   6  -2  337.53   14.28
  -2  -6   2 2820.68   79.96
   2  -6  -2 2769.86   78.72
   2  -6  -2 2817.11   80.44
   2   6  -2 2804.13   80.52
  -2   6   2 2748.57   79.89
  -2   6   2 2881.22   78.26
  -2   6   2 2921.00   78.08
   2   6  -2 2729.07   79.40
  -1  -6   2 1576.70   46.63
   1  -6  -2 1536.39   46.90
   1  -6  -2 1501.59   43.20
  -1  -6   2 1509.52   46.54
  -1   6   2 1505.61   42.36
   1   6  -2 1558.47   47.14
  -1   6   2 1614.06   47.02
   1   6  -2 1541.34   46.03
  -1   6   2 1574.50   42.53
   0  -6   2 1668.97   52.46
   0  -6   2 1815.63   52.53
   0  -6  -2 1740.33   52.30
   0   6  -2 1729.20   51.90
   0   6   2 1719.49   51.71
   0   6  -2 1780.98   52.94
  -1  -6  -2   16.15    1.75
   1  -6   2   20.60    4.33
  -1   6  -2   13.33    4.19
   1   6   2   21.44    4.16
  -1   6  -2   19.08    4.13
   2  -6   2  339.43   15.07
  -2   6  -2  321.77   15.55
   2   6   2  330.61   14.21
   2   6   2  344.75   10.83
   2   6   2  341.99   11.33
   3  -6   2   12.77    4.19
  -3  -6  -2   16.06    3.43
   3   6   2   16.21    4.25
   3   6   2   15.20    2.71
  -3   6  -2    9.72    4.41
   3   6   2   14.09    3.26
   4  -6   2   32.30    5.73
  -4  -6  -2   25.59    4.79
  -4   6  -2   26.95    5.61
   4   6   2   24.15    3.71
   4   6   2   24.78    4.76
   5  -7  -2    0.70    3.39
  -5  -7   2    3.59    3.68
  -5   7   2    1.06    3.78
   5   7  -2    5.51    4.02
   4  -7  -2   65.27    6.20
   4  -7  -2   60.44    6.53
  -4  -7   2   68.65    7.20
  -4   7   2   65.95    6.30
   4   7  -2   69.48    7.40
   4   7  -2   81.59    6.86
  -3  -7   2   33.31    7.61
   3  -7  -2   29.10    4.89
  -3  -7   2   27.20    2.95
   3  -7  -2   27.08    4.17
   3   7  -2   22.08    4.22
  -3   7   2   25.19    3.87
  -3   7   2   25.10    4.32
   3   7  -2   29.11    4.55
   2  -7  -2  775.14   23.79
  -2  -7   2  776.09   25.62
   2   7  -2  747.90   25.83
   2   7  -2  735.52   24.99
  -2   7   2  718.58   23.55
  -2   7   2  759.10   23.63
   1  -7  -2 1021.38   32.63
  -1  -7   2  984.26   31.62
   1  -7  -2  984.39   27.99
   1  -7  -2  935.03   28.16
  -1   7   2  934.54   31.57
   1   7  -2  992.58   31.22
  -1   7   2  954.90   27.08
   1   7  -2 1002.57   32.07
   0  -7  -2  307.04   13.64
   0  -7   2  246.90   19.03
   0   7  -2  285.58   13.79
   0   7   2  283.72   12.86
   0   7  -2  294.05   13.51
  -1  -7  -2   91.04    7.58
   1  -7   2  103.77    8.40
  -1   7  -2   98.84    7.83
   1   7   2  112.09    7.49
  -1   7  -2   88.15    9.50
  -2  -7  -2  366.36   11.91
   2  -7   2  379.88   16.09
   2   7   2  330.98   17.07
  -2   7  -2  373.61   16.74
  -3  -7  -2   36.73    4.10
   3  -7   2   36.49    5.65
   3   7   2   34.72    4.95
  -3   7  -2   42.60    6.33
   3   7   2   39.33    3.74
   4  -7   2   57.57    7.02
  -4   7  -2   63.77    7.86
   4   7   2   62.86    5.59
   5  -8  -2   48.17    5.86
  -5  -8   2   58.49    6.92
   5   8  -2   60.50    7.04
  -4  -8   2   47.84    6.03
   4  -8  -2   40.02    5.46
   4  -8  -2   45.13    5.54
   4   8  -2   43.27    6.01
  -4   8   2   43.42    7.61
   4   8  -2   46.95    6.81
  -4   8   2   39.83    5.34
  -3  -8   2   46.93    3.91
   3  -8  -2   50.28    5.47
   3  -8  -2   46.37    5.96
  -3  -8   2   43.75    5.49
   3   8  -2   60.07    5.90
   3   8  -2   59.56    6.77
  -3   8   2   46.18    5.18
  -3   8   2   46.36    5.62
   2  -8  -2   38.49    4.23
   2  -8  -2   41.06    5.53
  -2  -8   2   54.24    5.84
   2   8  -2   42.90    5.47
  -2   8   2   44.40    4.68
   2   8  -2   43.77    5.37
  -2   8   2   38.98    4.01
   1  -8  -2  484.13   19.03
  -1  -8   2  465.76   17.96
   1  -8  -2  464.13   14.97
   1   8  -2  434.62   17.52
  -1   8   2  468.12   18.49
   1   8  -2  466.21   18.27
  -1   8   2  504.80   13.75
  -1   8   2  457.71   13.47
   0  -8   2   36.87    5.57
   0  -8  -2   36.70    5.00
   0   8   2   29.13    4.71
   0   8  -2   42.26    5.52
   0   8  -2   31.46    5.04
  -1  -8  -2  593.64   22.03
   1  -8   2  602.61   22.55
  -1   8  -2  591.43   22.60
   1   8   2  572.99   21.18
  -2  -8  -2    0.71    2.28
   2  -8   2    0.56    3.18
  -2   8  -2   -2.87    3.30
   2   8   2   -1.45    3.37
   3  -8   2  470.42   19.15
   3   8   2  431.77   13.44
  -3   8  -2  456.91   19.68
   3   8   2  477.30   13.91
   3   8   2  436.84   17.16
  -5  -9   2   13.93    4.49
   5  -9  -2   11.85    5.28
   5   9  -2   12.84    4.50
  -5   9   2   10.19    4.34
   4  -9  -2  382.23   16.33
   4  -9  -2  466.41   24.25
  -4  -9   2  399.82   16.72
   4   9  -2  394.80   17.15
   4   9  -2  405.82   16.79
  -4   9   2  395.24   17.70
  -4   9   2  408.34   16.70
  -3  -9   2    3.89    3.25
  -3  -9   2    5.82    2.16
   3  -9  -2   -2.48    3.47
   3  -9  -2    2.94    2.94
   3   9  -2   -2.75    3.91
  -3   9   2   -3.08    3.56
  -3   9   2    1.02    2.64
   3   9  -2    4.43    3.26
  -2  -9   2  307.44   13.47
   2  -9  -2  298.64   11.64
   2  -9  -2  308.30   14.35
  -2   9   2  300.64   11.29
  -2   9   2  297.97   11.62
   2   9  -2  303.77   13.72
   2   9  -2  279.69   12.60
   1  -9  -2  373.17   16.25
   1  -9  -2  366.96   12.51
  -1  -9   2  376.97   16.02
   1   9  -2  388.65   15.99
  -1   9   2  361.17   10.58
   1   9  -2  361.82   15.11
  -1   9   2  395.41   10.78
   0  -9  -2  107.79    8.42
   0  -9   2   96.88    8.31
   0   9  -2   76.99    7.33
   0   9  -2  115.14    8.18
  -1  -9  -2   16.41    4.43
   1  -9   2   30.92    5.32
  -1   9  -2   20.69    4.64
  -2  -9  -2  128.89    5.01
   2  -9   2  173.12   10.68
  -2  -9  -2  157.71    5.15
  -2   9  -2  153.70   10.42
   3  -9   2  102.51    8.83
  -3   9  -2   95.88    9.77
   4 -10  -2    1.09    4.03
   4 -10  -2    0.76    4.00
  -4 -10   2    6.61    4.24
   4  10  -2   -1.00    3.59
  -4  10   2   -0.82    3.27
  -3 -10   2    8.30    2.61
  -3 -10   2    8.02    3.80
   3 -10  -2    7.46    4.55
   3 -10  -2    8.82    3.33
  -3  10   2   12.35    3.96
  -3  10   2    5.02    2.73
   3  10  -2   11.27    4.54
   3  10  -2    5.16    3.59
   2 -10  -2  870.45   26.27
   2 -10  -2  880.51   30.02
  -2 -10   2  803.83   31.14
  -2 -10   2  854.55   27.23
  -2  10   2  836.70   25.89
   2  10  -2  835.19   28.55
  -2  10   2  892.77   25.97
   2  10  -2  819.20   27.73
  -1 -10   2   -0.29    3.05
   1 -10  -2    1.37    3.19
   1  10  -2   -0.55    3.46
   0 -10   2  229.82   11.79
   0 -10  -2  199.13   11.42
   0  10  -2  202.54   11.22
  -1 -10  -2  354.28   15.98
   1 -10   2  390.48   16.69
  -1  10  -2  373.52   16.78
   2 -10   2   56.38    8.30
  -2  10  -2   54.16    6.79
   3 -10   2   19.39    5.50
  -3  10  -2    9.77    5.57
   4 -11  -2   18.06    4.99
  -4 -11   2   21.19    4.97
  -4  11   2   15.91    4.22
   4  11  -2   23.97    4.96
   3 -11  -2  108.63    7.84
  -3 -11   2  104.72    8.45
  -3 -11   2  108.77    6.86
   3 -11  -2  101.25    8.79
   3  11  -2  110.98    8.28
  -3  11   2  101.95    7.05
  -2 -11   2   23.87    5.01
   2 -11  -2   14.81    3.39
  -2 -11   2   23.60    3.95
   2  11  -2   21.59    4.47
   2  11  -2   33.12    4.98
  -2  11   2   19.02    3.11
  -2  11   2   21.89    3.06
   1 -11  -2  230.73   12.60
   1 -11  -2  234.82    8.57
  -1 -11   2  235.50   12.12
   1  11  -2  223.64   11.53
   1  11  -2  264.68   12.49
   0 -11   2   22.63    4.88
   0 -11  -2   19.85    4.78
   0  11  -2   12.83    4.96
   0  11  -2   25.99    4.55
  -1 -11  -2   -1.67    3.72
   1 -11   2    2.24    4.00
  -1  11  -2    6.12    3.77
   2 -11   2  134.87    9.64
  -2  11  -2  135.58   10.30
  -3 -12   2    4.76    4.40
   3 -12  -2    3.40    3.72
   3  12  -2    0.01    3.51
  -3  12   2    2.93    2.74
  -2 -12   2    3.37    3.93
   2 -12  -2    2.10    3.82
  -2 -12   2    9.67    3.59
  -2  12   2    5.51    2.18
   2  12  -2    5.78    3.81
  -2  12   2    0.92    2.49
  -1 -12   2   17.21    4.06
   1 -12  -2   15.95    4.99
  -1 -12   2   15.12    4.45
   1  12  -2   11.38    3.91
   0 -12   2  260.75   12.77
   0 -12  -2  207.45   14.22
   0  12  -2  243.77   12.93
   0  12  -2  258.77   12.59
   1 -12   2   26.45    5.42
  -1  12  -2   19.94    4.68
   2 -12   2   67.92    7.83
  -2  12  -2   75.74    7.80
  -3  13   2   97.78    6.86
   3  13  -2  102.40    8.08
  -2 -13   2   60.69    7.05
  -2 -13   2   59.81    6.82
   2  13  -2   73.34    6.88
  -1 -13   2   79.42    8.77
   1  13  -2   94.30    7.90
   0 -13   2   15.37    5.23
   0 -13  -2   18.80    5.43
   0  13  -2   17.38    4.55
   1 -13   2    8.67    4.66
  -1 -13  -2    1.47    4.81
  -1  13  -2    4.84    6.32
  -1 -14   2   23.28    4.76
  -1 -14   2   33.64    5.98
   1  14  -2   28.46    5.28
   0 -14   2    4.38    4.97
   0  14  -2    5.12    4.17
   6   0  -3    1.64    4.47
  -6   0   3    4.73    3.94
  -5   0   3  822.03   28.74
   5   0  -3  831.11   29.10
   4   0  -3   -0.64    3.26
  -4   0   3   -1.39    2.61
  -3   0   3  733.82   25.32
  -3   0   3  751.23   25.57
   3   0  -3  767.35   26.11
  -2   0   3    2.04    2.68
   2   0  -3   -4.05    2.09
   2   0  -3    8.46    3.20
  -2   0   3   -0.19    1.80
  -2   0   3    1.71    2.16
  -1   0   3  575.49   20.21
  -1   0   3  599.20   25.26
   1   0  -3  615.50   21.02
   1   0  -3  603.99   20.14
   0   0  -3    3.06    2.69
   0   0   3   -0.59    2.31
   0   0  -3    6.71    2.70
   0   0   3   -2.09    1.96
  -1   0  -3   -2.08    2.38
   1   0   3    1.96    2.37
   1   0   3   -1.17    3.20
   2   0   3   -2.12    2.36
   2   0   3   -2.59    3.82
  -2   0  -3    3.21    3.29
   3   0   3   86.43    6.61
   3   0   3   83.23    9.32
  -3   0  -3   92.25    8.49
  -4   0  -3   -7.04    4.71
  -6  -1   3   15.70    4.64
   6  -1  -3   13.14    4.88
  -6   1   3   13.73    4.58
   6   1  -3   14.99    5.33
   5  -1  -3   -1.06    3.47
  -5  -1   3    1.28    2.95
  -5   1   3    0.20    2.94
   5   1  -3   -1.48    3.58
   4  -1  -3  467.70   18.49
  -4  -1   3  458.28   18.19
  -4   1   3  436.76   17.84
   4   1  -3  453.72   18.55
  -3  -1   3  202.47   10.39
   3  -1  -3  176.68   13.68
  -3  -1   3  201.99    8.40
  -3  -1   3  184.42   10.30
  -3   1   3  205.76    9.07
  -3   1   3  213.89   10.30
   3   1  -3  223.04   11.13
  -2  -1   3   44.40    5.14
   2  -1  -3   33.73    4.34
  -2  -1   3   40.80    4.57
  -2  -1   3   43.81    4.28
   2  -1  -3   46.26    5.11
   2   1  -3   41.79    5.27
  -2   1   3   41.53    4.48
   2   1  -3   41.68    4.77
  -2   1   3   41.35    4.78
  -2   1   3   41.50    4.22
   1  -1  -3 2267.93   63.69
   1  -1  -3 2110.40   64.65
  -1  -1   3 2237.77   64.12
  -1  -1   3 2217.79   64.23
   1   1  -3 2247.43   63.72
  -1   1   3 2262.15   64.41
  -1   1   3 2275.50   63.29
  -1   1   3 2156.80   63.88
   1   1  -3 2273.31   64.70
   0  -1  -3  348.30   13.60
   0  -1  -3  327.06   12.92
   0  -1   3  335.11   13.93
   0  -1   3  339.39   14.14
   0   1   3  339.68   13.28
   0   1  -3  345.56   14.01
   0   1  -3  354.41   14.47
   0   1   3  365.96   13.51
  -1  -1  -3 1142.95   35.66
   1  -1   3 1143.91   36.04
   1  -1   3 1148.86   36.57
   1   1   3 1152.94   35.42
  -1   1  -3 1143.79   36.66
   1   1   3 1148.03   34.89
   2  -1   3    9.79    2.95
  -2  -1  -3   13.00    3.73
   2  -1   3    7.02    5.52
  -2   1  -3   11.29    4.18
   2   1   3    7.32    3.73
   2   1   3   13.78    3.13
   3  -1   3   36.49    5.23
  -3  -1  -3   30.21    5.07
  -3   1  -3   50.54    6.40
   3   1   3   34.72    4.70
   3   1   3   38.71    6.42
  -4  -1  -3   39.43    6.41
   4  -1   3   42.15    6.89
  -4   1  -3   32.91    7.13
   4   1   3   50.68    5.99
  -6  -2   3    1.92    3.81
   6  -2  -3    7.69    4.11
  -6   2   3    0.25    4.30
   6   2  -3    2.38    5.85
   5  -2  -3   21.00    3.34
  -5  -2   3   17.50    4.60
  -5   2   3   23.94    4.55
   5   2  -3   22.11    5.36
   4  -2  -3   74.34    6.92
  -4  -2   3   76.06    7.03
   4  -2  -3   61.43    5.33
  -4   2   3   72.22    6.57
   4   2  -3   65.72    6.84
   3  -2  -3   30.67    4.34
  -3  -2   3   32.29    4.88
   3  -2  -3   36.47    4.48
  -3  -2   3   34.02    3.63
  -3   2   3   30.43    3.85
  -3   2   3   28.73    4.47
   3   2  -3   26.49    4.51
  -3   2   3   31.84    4.38
  -2  -2   3   61.94    5.41
   2  -2  -3   66.36    5.57
   2  -2  -3   51.95    5.38
  -2  -2   3   67.31    6.22
   2   2  -3   73.28    5.82
  -2   2   3   69.90    5.26
  -2   2   3   65.19    5.59
   2   2  -3   52.62    8.78
  -2   2   3   66.63    5.20
  -1  -2   3  125.62    7.52
  -1  -2   3  115.85    7.73
   1  -2  -3  127.23    7.00
  -1   2   3  121.81    6.43
  -1   2   3  119.64    7.87
   1   2  -3  123.68    7.61
   1   2  -3  117.90    7.84
  -1   2   3  123.12    6.54
   0  -2  -3 2903.79   80.98
   0  -2   3 2941.49   83.57
   0  -2   3 2940.51   83.29
   0  -2  -3 3058.58   81.85
   0   2   3 2603.00   83.01
   0   2  -3 2968.86   83.93
   0   2   3 3026.10   81.28
   0   2   3 3052.85   84.04
   0   2  -3 2905.06   83.07
   1  -2   3    6.58    3.89
  -1  -2  -3    1.89    2.67
   1  -2   3    5.79    2.73
  -1   2  -3    5.39    4.01
   1   2   3    1.11    2.00
   1   2   3    7.09    2.88
   2  -2   3  232.17   13.37
  -2  -2  -3  262.15   11.84
   2  -2   3  254.01   12.50
   2   2   3  244.06   10.70
  -2   2  -3  280.32   13.24
   2   2   3  240.53   11.48
   3  -2   3   -1.34    2.93
  -3  -2  -3   -5.69    3.52
   3   2   3    5.01    4.29
   3   2   3   -1.67    2.55
  -3   2  -3    1.32    3.82
  -4  -2  -3   97.65    9.09
   4  -2   3  110.76    8.98
  -4   2  -3   96.38   10.09
   4   2   3  106.00    7.55
  -6  -3   3   68.93    7.71
   6  -3  -3   52.68    5.87
   6  -3  -3   60.26    7.96
  -6   3   3   73.23    8.13
   6   3  -3   74.99    8.13
   5  -3  -3    4.26    2.92
  -5  -3   3    8.07    3.89
   5  -3  -3    6.64    3.82
   5   3  -3    1.99    3.67
  -5   3   3    7.34    3.45
   4  -3  -3  663.05   22.65
  -4  -3   3  677.48   24.31
   4  -3  -3  680.59   24.26
   4   3  -3  708.58   25.11
  -4   3   3  664.98   23.88
   3  -3  -3  143.55    8.32
  -3  -3   3  139.10    8.51
   3  -3  -3  129.44    8.33
  -3  -3   3  134.20    6.38
   3   3  -3  140.29    9.05
  -3   3   3  141.25    8.00
  -3   3   3  137.06    7.86
  -3   3   3  131.83    8.21
   2  -3  -3    6.59    2.73
   2  -3  -3    0.08    2.47
  -2  -3   3    0.63    3.09
  -2  -3   3    4.54    2.57
   2  -3  -3    1.65    2.21
   2   3  -3    4.97    2.95
   2   3  -3    4.60    2.66
  -2   3   3    3.91    2.46
  -2   3   3    1.71    1.85
   1  -3  -3  692.50   27.29
  -1  -3   3  881.86   27.96
   1  -3  -3  799.98   29.24
  -1  -3   3  841.74   27.92
   1   3  -3  822.20   27.24
  -1   3   3  871.81   25.22
  -1   3   3  850.85   27.80
  -1   3   3  888.17   25.41
   1   3  -3  801.95   30.89
   0  -3  -3  283.40   14.09
   0  -3   3  313.09   14.43
   0  -3   3  319.50   13.91
   0  -3  -3  330.37   12.05
   0   3   3  332.38   11.31
   0   3   3  330.50   11.34
   0   3  -3  291.73   13.83
   0   3   3  321.43   14.17
  -1  -3  -3  351.21   14.80
   1  -3   3  354.76   15.98
   1  -3   3  386.30   16.03
  -1   3  -3  372.23   16.22
   1   3   3  382.44   13.45
   1   3   3  369.60   12.84
   1   3   3  356.99   17.28
   2  -3   3   15.09    4.06
  -2  -3  -3   16.85    3.65
   2   3   3   17.20    2.90
  -2   3  -3   16.02    4.60
   2   3   3   18.92    3.74
   2   3   3   21.08    4.42
  -3  -3  -3    2.23    3.70
   3  -3   3   -2.59    3.02
   3   3   3    4.61    2.66
  -3   3  -3    4.66    4.01
   3   3   3    3.63    4.04
  -4  -3  -3   50.72    6.57
   4  -3   3   51.30    6.59
   4   3   3   60.72    5.94
  -4   3  -3   64.20    7.74
  -6  -4   3   12.79    5.01
   6  -4  -3    7.24    4.30
   6  -4  -3    4.55    3.69
   6   4  -3    9.20    4.72
  -6   4   3    6.07    4.27
   5  -4  -3  457.87   18.93
   5  -4  -3  454.41   17.46
  -5  -4   3  445.56   18.70
   5   4  -3  494.88   19.67
  -5   4   3  463.42   18.92
   4  -4  -3    6.26    3.05
   4  -4  -3    4.58    3.35
  -4  -4   3    1.32    3.14
  -4   4   3    1.99    3.64
  -4   4   3    1.39    4.64
   4   4  -3    1.47    3.22
   3  -4  -3  570.14   19.91
   3  -4  -3  566.19   20.18
  -3  -4   3  543.20   20.45
  -3   4   3  513.30   19.08
  -3   4   3  534.95   19.22
  -3   4   3  549.07   19.38
   3   4  -3  528.05   20.80
  -2  -4   3   17.30    4.98
   2  -4  -3   17.85    3.31
   2  -4  -3   18.85    3.87
   2  -4  -3   19.62    3.38
  -2  -4   3   14.03    3.41
  -2   4   3   13.44    2.74
  -2   4   3   13.05    2.54
  -2   4   3   22.58    3.92
   2   4  -3   16.18    3.80
   2   4  -3   11.48    3.76
  -1  -4   3  411.31   17.12
   1  -4  -3  451.45   14.86
   1  -4  -3  430.46   17.65
  -1  -4   3  444.58   17.23
  -1   4   3  405.76   16.92
   1   4  -3  416.38   16.75
  -1   4   3  459.11   14.30
   1   4  -3  434.57   17.63
   0  -4  -3  348.09   11.74
   0  -4   3  351.96   15.71
   0  -4   3  372.74   15.37
   0   4   3  344.11   14.97
   0   4  -3  346.89   15.46
   0   4   3  342.03   11.25
   0   4   3  357.11   11.35
  -1  -4  -3   14.06    2.72
  -1  -4  -3   16.47    2.84
   1  -4   3    7.06    3.53
   1   4   3   11.70    2.41
   1   4   3    9.77    1.95
  -1   4  -3   11.82    3.99
   1   4   3   10.02    3.62
  -2  -4  -3   -1.46    2.61
   2   4   3   -3.24    2.58
   2   4   3   -0.53    1.80
   2   4   3    2.52    3.54
  -2   4  -3    1.96    3.77
  -3  -4  -3   86.59    7.20
   3  -4   3   76.45    7.91
   3   4   3   78.68    5.57
   3   4   3   65.16    6.70
  -3   4  -3   83.32    8.09
  -4   4  -3   23.20    5.91
   5  -5  -3    2.43    3.65
  -5  -5   3    7.88    3.83
   5  -5  -3    3.99    3.43
  -5   5   3    3.92    3.07
   5   5  -3   11.83    4.06
   4  -5  -3   51.39    5.78
   4  -5  -3   46.41    5.81
  -4  -5   3   41.70    5.59
  -4   5   3   44.94    5.41
   4   5  -3   42.60    6.17
  -4   5   3   38.39    5.74
  -3  -5   3  108.20    7.81
   3  -5  -3   97.74    7.15
   3  -5  -3  103.18    7.60
  -3   5   3  107.80   13.23
   3   5  -3  101.08    8.01
  -3   5   3  103.21    7.13
  -3   5   3  111.01    6.81
   2  -5  -3  186.96   10.37
   2  -5  -3  181.81    8.74
  -2  -5   3  195.99   10.34
   2   5  -3  194.17   10.71
   2   5  -3  170.86    9.87
  -2   5   3  185.56    8.23
  -2   5   3  197.04    8.24
  -2   5   3  188.63   10.14
   1  -5  -3  875.94   29.86
  -1  -5   3  898.06   29.81
  -1   5   3  904.84   25.39
  -1   5   3  840.22   29.40
   1   5  -3  883.01   29.23
  -1   5   3  913.16   25.61
   1   5  -3  868.92   30.18
   0  -5  -3   16.66    2.01
   0  -5  -3   20.79    2.40
   0  -5   3   22.66    4.17
   0   5   3   15.12    7.39
   0   5  -3   15.47    3.99
   0   5   3   13.72    0.84
  -1  -5  -3  884.12   26.60
   1  -5   3  894.48   31.16
  -1  -5  -3  912.99   26.96
   1   5   3  896.56   25.31
  -1   5  -3  962.52   32.07
   1   5   3  925.65   25.69
   1   5   3  933.51   30.82
  -2  -5  -3   18.81    3.27
   2  -5   3   22.07    4.78
  -2   5  -3    9.03    4.51
   2   5   3   18.87    2.97
   3  -5   3   36.43    5.71
  -3  -5  -3   28.05    4.57
  -3   5  -3   43.04    6.71
   3   5   3   39.51    4.61
  -5  -6   3   84.14    8.56
   5  -6  -3   88.47    7.58
   5  -6  -3   81.79    7.25
  -5   6   3   77.00    7.53
   5   6  -3   71.07    7.66
   4  -6  -3   39.80    5.33
  -4  -6   3   37.82    5.62
   4  -6  -3   47.13    5.61
  -4   6   3   39.04    5.03
   4   6  -3   39.56    5.72
  -4   6   3   39.36    5.36
   3  -6  -3   15.96    3.88
  -3  -6   3   20.06    4.55
   3  -6  -3   23.26    3.87
  -3   6   3   24.21    3.63
   3   6  -3   15.21    4.31
  -3   6   3   18.72    3.93
  -3   6   3   17.91    3.84
   2  -6  -3   37.43    5.15
  -2  -6   3   35.85    5.03
   2  -6  -3   45.13    4.41
  -2   6   3   35.30    3.67
  -2   6   3   31.84    5.12
   2   6  -3   38.66    5.63
  -2   6   3   35.17    3.88
   2   6  -3   34.28    5.08
   1  -6  -3  183.40    7.31
   1  -6  -3  187.25   10.71
  -1  -6   3  192.66   10.39
  -1   6   3  170.17    6.03
  -1   6   3  185.95    6.17
   1   6  -3  171.62   10.20
  -1   6   3  164.32   10.06
   1   6  -3  177.90   12.28
   0  -6  -3  795.74   22.89
   0  -6  -3  809.75   23.66
   0  -6   3  833.34   28.80
   0   6  -3  849.21   29.56
   0   6   3  870.20   28.70
   1  -6   3   29.17    5.29
  -1  -6  -3   28.60    2.89
  -1  -6  -3   35.11    3.06
  -1   6  -3   29.92    5.56
   1   6   3   24.76    4.94
   2  -6   3  154.43    9.93
   2   6   3  149.46    5.95
   2   6   3  141.71    5.48
  -2   6  -3  146.84   11.11
   3  -6   3    4.42    4.27
  -3  -6  -3    1.18    4.87
   3   6   3    1.17    3.06
  -3   6  -3    0.91    4.13
   3   6   3    0.54    3.10
   5  -7  -3   13.08    4.17
  -5  -7   3    8.20    4.46
   5  -7  -3    5.14    3.97
  -5   7   3    5.53    3.88
   5   7  -3   12.29    4.80
   4  -7  -3  392.07   16.75
   4  -7  -3  432.39   16.80
  -4  -7   3  415.09   17.08
  -4   7   3  422.99   16.36
  -4   7   3  381.80   16.65
   4   7  -3  392.81   17.60
   3  -7  -3   38.76    5.40
  -3  -7   3   47.92    6.07
   3  -7  -3   34.68    4.62
   3   7  -3   31.51    8.68
  -3   7   3   40.21    4.47
  -3   7   3   43.33    4.97
  -2  -7   3   13.71    3.84
   2  -7  -3   14.40    3.05
   2  -7  -3   15.32    3.71
  -2   7   3   13.61    2.53
   2   7  -3   11.55    3.83
  -2   7   3   16.92    2.52
   1  -7  -3  118.80    5.88
   1  -7  -3  121.88    5.39
   1  -7  -3  124.54    8.95
  -1  -7   3  136.22    9.04
   1   7  -3  121.60    9.15
  -1   7   3  109.22    8.73
   0  -7   3  113.07    8.43
   0   7  -3   85.61    7.91
   1  -7   3   68.87    7.21
  -1  -7  -3   85.67    2.79
  -1   7  -3   66.08    7.60
  -2  -7  -3    8.97    2.39
   2  -7   3   19.94    4.77
  -2   7  -3    7.07    4.42
   3  -7   3    2.44    3.98
   3   7   3    0.85    2.42
  -3   7  -3   -2.95    4.17
   3   7   3    1.67    1.84
   5  -8  -3  118.99    8.83
   5  -8  -3   88.96    8.57
  -5  -8   3  107.06    8.80
  -5   8   3   88.30    8.87
   5   8  -3   97.47    9.45
   4  -8  -3   -6.16    3.67
  -4  -8   3   -3.06    3.23
   4  -8  -3    0.54    3.56
  -4  -8   3   -0.30    1.03
   4   8  -3   -6.22    3.31
  -4   8   3    1.72    2.91
  -3  -8   3  229.73   12.13
   3  -8  -3  231.23   10.60
   3  -8  -3  223.03   12.00
  -3   8   3  245.35   10.23
  -3   8   3  218.07   10.39
   3   8  -3  228.26   12.39
   2  -8  -3    0.89    2.20
  -2  -8   3    5.21    3.44
   2  -8  -3    6.79    3.52
  -2   8   3    3.72    2.09
  -2   8   3    4.24    1.73
   2   8  -3    5.09    3.53
   1  -8  -3   11.63    1.93
   1  -8  -3    8.39    3.66
   1  -8  -3    9.83    2.04
  -1  -8   3   10.06    3.50
   1   8  -3    8.33    3.80
   0  -8  -3  320.86   14.98
   0  -8   3  320.16   15.00
   0   8  -3  329.09   16.33
   1  -8   3    2.53    3.51
  -1   8  -3   -0.05    3.65
  -2  -8  -3   -2.26    1.71
   2  -8   3   -4.34    3.43
  -2   8  -3   -1.43    4.49
   3  -8   3   43.86    7.07
  -3   8  -3   47.28    8.43
  -4  -9   3    0.36    3.58
  -4  -9   3   -0.79    1.58
   4  -9  -3   -3.39    3.54
   4  -9  -3    2.75    3.92
   4   9  -3    4.09    4.23
  -4   9   3   -0.22    2.84
   3  -9  -3    7.20    3.25
  -3  -9   3    9.12    3.85
   3  -9  -3    6.40    3.78
  -3   9   3    9.12    4.29
  -3   9   3    6.17    3.50
   3   9  -3    1.35    3.85
  -2  -9   3  156.47    9.64
   2  -9  -3  127.76    6.93
   2  -9  -3  150.02    9.83
  -2   9   3  143.56    6.06
  -2   9   3  137.48    8.54
   2   9  -3  156.33    9.57
   1  -9  -3  254.39    7.80
   1  -9  -3  228.12   12.79
  -1  -9   3  221.33   12.61
   1   9  -3  238.11   12.47
   0  -9   3    8.74    4.44
   0  -9  -3   13.39    4.35
   0   9  -3   11.70    4.22
  -1   9  -3  337.70   16.06
   2  -9   3   14.41    4.86
  -2   9  -3   10.79    5.08
  -4 -10   3   24.95    5.07
   4 -10  -3   28.28    4.86
   4  10  -3   24.17    5.55
  -4  10   3   21.77    4.04
   3 -10  -3   13.86    4.40
  -3 -10   3   20.55    4.55
  -3 -10   3   23.64    3.63
   3 -10  -3   20.43    3.86
  -3  10   3   17.54    3.92
   3  10  -3    9.08    4.32
  -3  10   3   20.44    3.23
  -2 -10   3   12.97    4.75
  -2  10   3   16.55    2.01
  -2  10   3   13.47    2.19
   2  10  -3   13.13    4.12
   1 -10  -3   81.57    8.55
  -1 -10   3   97.53    8.61
   0 -10  -3  179.37   11.04
   0 -10   3  186.59   11.93
   0  10  -3  180.95   11.82
   1 -10   3   27.50    5.39
  -1  10  -3   28.05    6.14
   2 -10   3   60.68    7.18
  -2  10  -3   74.82   13.55
   4 -11  -3  131.84    9.75
  -4  11   3  138.75    8.21
   4  11  -3  141.62    9.98
  -3 -11   3   15.91    4.63
   3 -11  -3    6.60    3.81
   3  11  -3   10.10    4.53
  -3  11   3   14.16    2.73
   2 -11  -3   -2.49    4.17
   2 -11  -3    3.67    2.52
  -2 -11   3   -1.80    3.74
  -2  11   3    0.33    1.12
  -2  11   3   -2.22    1.25
   2  11  -3   -4.23    3.67
  -1 -11   3    0.23    3.74
   1 -11  -3   -1.84    3.74
   1  11  -3   -4.06    3.99
   0 -11   3   12.29    5.04
   0 -11  -3    6.92    4.38
   0  11  -3   12.06    4.42
   1 -11   3    4.66    4.73
  -1  11  -3    4.71    4.72
  -2  11  -3    4.76    4.82
  -3 -12   3   62.20    6.37
  -3 -12   3   56.23    6.88
  -3  12   3   67.38    4.89
   3  12  -3   56.02    7.93
  -2 -12   3    6.75    4.77
   2  12  -3    7.63    4.46
  -1 -12   3    8.13    4.90
   1  12  -3    4.64    4.07
   0 -12   3  103.76   10.67
   0  12  -3   97.01    8.82
   1 -12   3    3.88    4.65
  -1  12  -3    1.96    4.78
  -2 -13   3   36.71    6.51
  -2 -13   3   49.38   10.31
  -1 -13   3   28.79    5.95
   1  13  -3   34.11    6.21
   0 -13   3   27.60    5.76
   0  13  -3   27.99    6.05
  -6   0   4   75.53   10.95
   6   0  -4   61.22    8.09
  -5   0   4    4.28    3.07
   5   0  -4   -0.17    4.09
   4   0  -4 1259.77   40.62
  -4   0   4 1325.06   41.03
  -4   0   4 1206.23   36.85
   3   0  -4    1.38    3.22
  -3   0   4    6.45    4.03
  -3   0   4    2.65    2.68
  -3   0   4    0.28    2.57
  -2   0   4   17.36    4.17
   2   0  -4   14.57    3.95
  -2   0   4   15.14    3.17
  -2   0   4   12.67    3.53
  -1   0   4    2.48    2.26
  -1   0   4    3.85    3.19
   1   0  -4    6.52    3.40
   0   0   4  783.98   26.75
   0   0  -4  793.11   27.25
   0   0   4  807.70   26.72
  -1   0  -4   -4.93    3.26
   1   0   4    3.80    2.90
   1   0   4    5.17    4.11
   2   0   4  551.11   22.75
  -2   0  -4  579.38   21.86
   2   0   4  571.13   20.68
  -3   0  -4    1.16    4.86
   3   0   4    1.43    3.26
   6  -1  -4    5.63    4.56
   6   1  -4    3.98    4.52
  -6   1   4    6.24    4.28
  -5  -1   4   26.17    4.72
   5  -1  -4   21.76    5.14
  -5   1   4   17.60    4.13
   5   1  -4   21.65    4.81
  -4  -1   4  479.28   24.67
  -4  -1   4  505.36   16.81
   4  -1  -4  524.93   20.31
  -4   1   4  487.64   17.38
   4   1  -4  513.76   20.40
  -4   1   4  517.01   19.59
  -3  -1   4 3359.42   95.15
   3  -1  -4 3340.86   95.11
  -3  -1   4 3346.57   92.72
  -3   1   4 3338.78   93.26
  -3   1   4 3290.99   94.19
  -3   1   4 3383.05   94.66
   3   1  -4 3373.94   95.84
  -2  -1   4   79.91    6.62
   2  -1  -4   91.19    7.18
  -2  -1   4   67.56    6.94
  -2  -1   4   70.85    6.18
  -2   1   4   82.01    6.17
   2   1  -4   75.65    6.80
  -2   1   4   79.22    7.02
  -2   1   4   68.15    6.49
   1  -1  -4  424.79   16.86
  -1  -1   4  438.97   17.51
  -1  -1   4  457.52   17.38
  -1   1   4  440.66   16.45
  -1   1   4  436.88   16.42
  -1   1   4  435.29   17.78
   1   1  -4  452.47   17.84
   0  -1  -4  396.91   16.13
   0  -1   4  402.19   16.40
   0  -1   4  396.23   16.79
   0   1   4  403.07   15.69
   0   1  -4  410.86   17.11
   0   1   4  401.78   15.47
   1  -1   4   48.45    5.42
  -1  -1  -4   47.52    5.86
   1   1   4   39.97    5.47
  -1   1  -4   42.81    6.40
   1   1   4   38.73    4.82
   2  -1   4  144.18    8.74
   2  -1   4  117.12   10.20
  -2  -1  -4  130.82   15.71
  -2   1  -4  149.13   10.52
   2   1   4  132.87    9.79
   2   1   4  137.54    8.21
  -3  -1  -4   25.66    5.90
   3  -1   4   31.71    5.09
   3   1   4   31.21    4.64
  -3   1  -4   38.96    6.69
   6  -2  -4   17.79    5.05
  -6  -2   4   19.80    6.03
  -6   2   4   20.09    4.88
   6   2  -4   18.99    5.57
  -5  -2   4   20.86    4.34
   5  -2  -4   12.63    6.13
  -5   2   4   22.94    4.67
   5   2  -4   15.44    4.47
  -4  -2   4   30.17    7.90
  -4  -2   4   18.42    3.03
   4  -2  -4   24.50    4.88
  -4   2   4   30.90    4.64
   4   2  -4   25.72    5.11
  -4   2   4   24.67    4.06
  -3  -2   4   33.04    4.22
  -3  -2   4   42.33    5.35
  -3   2   4   38.98    4.73
   3   2  -4   47.55    6.49
  -3   2   4   39.99    5.05
  -2  -2   4  194.55   11.09
  -2  -2   4  219.21   11.27
   2  -2  -4  211.39   10.71
  -2   2   4  222.09   10.33
   2   2  -4  206.97   11.37
  -2   2   4  232.36   10.25
  -2   2   4  226.95   12.69
  -1  -2   4  511.56   19.91
   1  -2  -4  532.11   19.03
  -1  -2   4  512.13   19.65
  -1   2   4  526.35   18.39
   1   2  -4  537.63   20.52
  -1   2   4  509.23   20.22
  -1   2   4  545.54   18.49
   0  -2  -4  237.33   11.10
   0  -2   4  225.37   12.70
   0  -2   4  246.37   11.86
   0   2   4  235.57   10.72
   0   2   4  229.04   10.23
   0   2   4  235.39   13.59
   0   2  -4  215.96   12.01
   1  -2   4 3373.29   97.38
  -1  -2  -4 3435.28   95.95
   1   2   4 3364.03   95.16
   1   2   4 3388.75   94.29
  -1   2  -4 3532.49   98.14
   2  -2   4   85.91    7.70
  -2  -2  -4   90.06    7.72
  -2   2  -4   92.36    8.47
   2   2   4   90.78    6.50
   2   2   4  101.49    8.16
  -3  -2  -4   15.51    5.18
   3   2   4   19.69    4.08
  -3   2  -4   32.57    5.86
  -6  -3   4   40.00    6.39
   6  -3  -4   32.40    6.42
  -6   3   4   41.73    6.10
   6   3  -4   30.53    6.29
  -5  -3   4  145.29    9.64
   5  -3  -4  124.70   10.11
   5   3  -4   99.34    9.91
  -5   3   4  132.85    9.10
  -4  -3   4  792.40   35.22
   4  -3  -4  796.79   27.76
  -4   3   4  825.24   27.41
  -4   3   4  785.03   26.43
   3  -3  -4 1421.56   43.67
  -3  -3   4 1407.78   44.46
  -3  -3   4 1382.01   41.86
  -3   3   4 1479.23   43.27
  -3   3   4 1423.90   43.40
  -3   3   4 1374.16   42.57
   3   3  -4 1480.72   45.59
   2  -3  -4  896.04   29.02
  -2  -3   4  915.60   30.55
  -2   3   4  885.07   29.90
  -2   3   4  875.59   28.13
   2   3  -4  921.28   31.12
  -2   3   4  906.76   28.35
  -1  -3   4   14.01    3.76
  -1  -3   4   20.43    5.06
   1  -3  -4   10.57    3.22
  -1   3   4   18.76    4.36
  -1   3   4   17.38    2.99
   1   3  -4   12.18    4.27
  -1   3   4   14.10    2.91
   0  -3  -4   28.39    4.25
   0  -3   4   40.04    6.71
   0  -3   4   45.85    5.76
   0   3  -4   34.58    5.58
   0   3   4   39.25    4.33
   0   3   4   37.30    4.07
   1  -3   4   17.66    4.26
  -1  -3  -4   20.50    4.00
   1   3   4   13.69    2.90
  -1   3  -4   17.59    5.07
   1   3   4   17.01    3.66
  -2  -3  -4    7.08    3.73
   2  -3   4   -1.08    3.16
  -2   3  -4    6.41    4.88
   2   3   4    5.48    2.46
   2   3   4    0.82    5.60
   3  -3   4    0.02    3.45
  -3  -3  -4   -2.91    4.62
   3   3   4   -1.72    2.68
  -3   3  -4    1.64    4.61
  -5  -4   4   34.30    5.20
   5  -4  -4   22.23    4.27
   5  -4  -4   21.45    5.13
  -5   4   4   21.36    4.20
   5   4  -4   21.28    5.18
  -4  -4   4  725.00   22.14
  -4  -4   4  775.00   29.03
   4  -4  -4  739.47   26.06
   4  -4  -4  724.92   25.35
  -4   4   4  689.17   25.07
  -4   4   4  749.22   25.34
   4   4  -4  779.07   27.51
  -4   4   4  726.88   24.73
   3  -4  -4  229.36   11.36
  -3  -4   4  232.02   12.20
   3   4  -4  238.13   13.22
  -3   4   4  209.34   11.39
  -3   4   4  240.84   10.77
  -3   4   4  227.43   10.69
   2  -4  -4   25.59    4.07
  -2  -4   4   33.49    4.97
   2   4  -4   23.55    4.98
  -2   4   4   25.82    3.48
  -2   4   4   19.91    4.31
  -1  -4   4  545.96   20.72
   1  -4  -4  515.55   18.40
  -1   4   4  529.22   17.33
   1   4  -4  513.59   20.67
  -1   4   4  544.67   22.98
  -1   4   4  509.96   17.04
   0  -4   4  112.75    8.55
   0  -4  -4  134.19    7.46
   0   4  -4  132.11    9.37
   0   4   4  123.19    6.26
   0   4   4  123.09    6.11
   1  -4   4   89.48    8.04
   1   4   4   74.50    5.48
   1   4   4   79.36    4.93
  -1   4  -4   85.92    8.05
   2  -4   4  224.27   11.87
  -2  -4  -4  215.73   10.52
  -2   4  -4  214.19   18.85
   2   4   4  203.09    9.82
   2   4   4  195.17   12.10
   3  -4   4  105.50    9.26
   3   4   4  103.93    6.63
  -3   4  -4  102.41    9.54
  -5  -5   4   92.54    8.74
   5  -5  -4   68.70    7.01
   5  -5  -4   74.16    7.95
  -5   5   4   81.91    6.83
   5   5  -4   65.53    7.87
   4  -5  -4    1.58    3.65
  -4  -5   4    2.97    3.65
   4  -5  -4    1.69    3.42
  -4  -5   4   -1.05    1.92
   4   5  -4    0.88    4.03
  -4   5   4    4.92    2.67
  -4   5   4   -2.61    4.05
  -3  -5   4 1565.23   49.10
   3  -5  -4 1570.75   48.75
   3  -5  -4 1582.54   47.47
  -3   5   4 1622.55   46.98
  -3   5   4 1560.02   46.47
   3   5  -4 1630.95   50.21
   2  -5  -4  233.60   10.48
  -2  -5   4  238.79   12.24
  -2   5   4  235.56    9.59
   2   5  -4  239.22   12.71
  -2   5   4  216.32    9.43
  -1  -5   4  274.66   13.73
   1  -5  -4  291.50   11.42
  -1   5   4  298.66   10.35
   1   5  -4  289.44   14.21
   0  -5   4  678.99   25.19
   0   5  -4  696.21   25.64
   0   5   4  669.18   19.68
   0   5   4  647.04   19.40
   1  -5   4   30.01    5.25
   1   5   4   33.38    3.00
   1   5   4   29.49    3.28
  -1   5  -4   37.68    6.33
   2  -5   4  284.78   13.83
   2   5   4  268.28    9.71
   2   5   4  264.58   10.65
  -2   5  -4  264.33   14.67
   5  -6  -4    2.91    3.97
  -5  -6   4   -3.45    4.25
   5  -6  -4    0.11    3.79
   5   6  -4   -5.12    3.97
  -5   6   4    1.26    3.11
  -4  -6   4  182.46    9.81
  -4  -6   4  165.21   10.65
   4  -6  -4  140.22   10.06
   4  -6  -4  167.30    9.93
  -4   6   4  146.97    8.64
   3  -6  -4   31.99    5.39
  -3  -6   4   19.44    4.50
   3  -6  -4   23.52    4.29
  -3   6   4   25.14    4.04
  -3   6   4   32.63    4.03
   3   6  -4   28.61    5.91
   2  -6  -4  411.27   15.13
  -2  -6   4  405.50   17.74
   2  -6  -4  405.14   17.62
   2   6  -4  460.41   18.68
  -2   6   4  405.48   14.03
  -2   6   4  417.91   14.17
  -1  -6   4   -2.28    3.22
  -1   6   4    1.74    1.34
   1   6  -4    0.23    3.27
  -1   6   4    1.91    1.38
   0  -6  -4  608.97   18.67
   0  -6   4  591.35   32.09
   0   6  -4  624.36   24.07
  -1  -6  -4  769.55   23.12
   1  -6   4  774.43   27.95
  -1   6  -4  757.28   28.35
   2  -6   4  272.83   13.96
  -2   6  -4  246.76   14.21
   2   6   4  256.31    8.57
   2   6   4  245.13    8.14
   5  -7  -4  340.25   15.14
  -5  -7   4  358.81   16.23
   5  -7  -4  351.21   15.51
  -5   7   4  342.95   19.32
   5   7  -4  364.70   17.37
  -4  -7   4  194.83   11.32
   4  -7  -4  175.49   11.22
   4  -7  -4  184.67   10.62
  -4   7   4  182.39   10.58
   4   7  -4  183.15   11.64
  -4   7   4  199.80    9.67
  -3  -7   4  140.54    9.45
   3  -7  -4  121.51    8.02
   3  -7  -4  130.69    9.34
  -3   7   4  127.69    7.10
   3   7  -4  120.45    9.29
  -3   7   4  106.78    8.13
   2  -7  -4  380.10   14.08
  -2  -7   4  388.97   16.99
   2  -7  -4  379.28   17.46
  -2   7   4  406.44   13.19
  -2   7   4  399.99   13.13
   2   7  -4  402.45   17.86
   1  -7  -4   95.42    5.49
  -1  -7   4  111.64    8.63
   1   7  -4  103.33    8.93
   0  -7  -4    0.33    1.61
   0  -7  -4    0.61    1.44
   0  -7   4    2.40    3.66
   0   7  -4    5.58    4.15
  -1  -7  -4   14.88    2.33
   1  -7   4    7.95    4.01
  -1   7  -4   13.53    4.69
   2  -7   4    9.13    4.55
  -2   7  -4    1.56    5.11
  -4  -8   4  243.77   12.77
   4  -8  -4  214.77   12.51
   4  -8  -4  223.82   11.74
   4   8  -4  255.66   13.41
  -4   8   4  238.86   10.74
  -3  -8   4  132.79   12.12
   3  -8  -4  132.95    8.27
   3  -8  -4  188.37   13.50
  -3   8   4  134.83    9.73
  -3   8   4  130.53    7.61
   3   8  -4  134.67   10.54
  -2  -8   4  164.21   10.90
   2  -8  -4  172.74   10.88
   2   8  -4  163.19   11.25
  -2   8   4  164.35    6.53
  -2   8   4  157.24    6.36
   1  -8  -4  355.73   11.94
  -1  -8   4  336.53   19.34
   1   8  -4  339.23   16.59
   0  -8   4   15.49    5.33
   0   8  -4   26.88    5.58
   1  -8   4   16.80    5.18
  -1   8  -4   17.63    5.66
  -2   8  -4   11.51    5.35
   4  -9  -4   65.74    7.83
  -4  -9   4   52.75    7.07
  -4   9   4   64.54    5.82
   3  -9  -4  113.65    7.95
  -3  -9   4  119.38    9.88
   3  -9  -4  119.80    9.76
   3   9  -4  123.79   10.28
  -3   9   4  123.35    6.45
  -3   9   4  133.59    7.26
   2  -9  -4  251.86   10.14
   2  -9  -4  248.84   13.79
  -2   9   4  243.12    7.71
   2   9  -4  267.40   14.00
  -2   9   4  292.96    7.93
   1  -9  -4    4.11    4.09
  -1  -9   4    1.87    4.32
   1   9  -4    4.72    4.35
   0  -9   4  341.91   16.59
   0   9  -4  378.14   17.40
   1  -9   4   19.01    5.40
  -1   9  -4   26.52    5.89
  -4  10   4  104.51    6.95
   4  10  -4  115.80   10.32
  -3 -10   4    8.80    4.81
   3 -10  -4   13.38    4.22
   3  10  -4    8.35    4.75
  -3  10   4   12.30    2.42
  -2 -10   4  174.17   11.10
   2 -10  -4  189.46   14.38
   2 -10  -4  171.09    7.92
   2  10  -4  184.78   11.57
  -1 -10   4  120.01   10.42
   1 -10  -4  133.88   10.31
   1  10  -4  128.78    9.93
   0 -10   4  183.32   11.97
   0  10  -4  175.67   11.75
   1 -10   4   19.67    5.60
  -1  10  -4    6.65    5.59
  -3 -11   4    3.92    4.47
   3  11  -4    4.86    4.87
  -3  11   4    4.98    2.12
  -2 -11   4   28.09    5.88
  -1 -11   4  117.31    9.66
   1  11  -4  104.50   14.77
   0 -11   4    0.01    4.42
   0  11  -4    1.19    4.89
   1  12  -4   47.65    7.45
  -5   0   5    0.60    3.65
   5   0  -5    2.52    4.44
  -5   0   5    2.65    3.19
  -4   0   5   -4.07    2.67
   4   0  -5    2.94    4.00
  -4   0   5   -0.33    3.46
  -3   0   5  656.76   23.88
  -3   0   5  664.32   23.67
   3   0  -5  700.73   25.11
  -2   0   5    6.82    4.15
   2   0  -5   -4.54    3.71
  -2   0   5    1.56    3.89
  -1   0   5    3.45    3.72
   1   0  -5   15.03    4.33
  -1   0   5    2.53    3.10
   0   0   5   -4.76    4.27
   0   0   5    0.94    3.04
   0   0  -5   -0.24    4.09
   1   0   5   33.16    4.87
  -1   0  -5   31.82    5.78
   1   0   5   40.34    6.28
  -2   0  -5   -5.79    4.50
   2   0   5   -1.68    3.45
  -5  -1   5    4.75    3.76
   5  -1  -5    5.18    4.30
  -5  -1   5    6.09    3.07
  -5   1   5   17.30    3.89
   5   1  -5   10.75    5.14
  -5   1   5    2.79    3.60
  -4  -1   5   90.72    8.07
  -4  -1   5   61.81    9.61
   4  -1  -5   87.75    8.72
   4   1  -5   93.37    9.77
  -4   1   5   88.05    7.74
  -4   1   5   90.45    7.55
   3  -1  -5   23.81    4.83
  -3  -1   5   21.17    4.56
  -3  -1   5   18.69    4.54
   3   1  -5   21.18    4.68
  -3   1   5   21.00    4.20
  -3   1   5   23.61    4.82
  -2  -1   5   29.52    4.80
   2  -1  -5   26.27    5.03
  -2  -1   5   16.59    6.04
   2   1  -5   30.88    5.78
  -2   1   5   27.02    4.77
  -1  -1   5  124.68   10.07
   1  -1  -5  156.12    9.71
  -1  -1   5  140.15    8.90
   1   1  -5  155.92    9.85
  -1   1   5  141.70    9.14
  -1   1   5  147.23    9.85
   0  -1   5    2.68    2.88
   0  -1   5    9.55    5.23
   0  -1  -5    3.22    4.19
   0   1  -5    3.30    4.48
   0   1   5    6.88    4.14
   0   1   5    2.75    2.80
   1  -1   5   69.87    6.89
  -1  -1  -5   61.37    7.40
  -1   1  -5   66.60    7.39
   1   1   5   68.83    6.14
   1   1   5   66.48    7.36
  -2  -1  -5    2.30    4.66
  -2   1  -5    1.74    5.02
   2   1   5   -4.66    3.08
   5  -2  -5   -4.00    4.09
  -5  -2   5    1.36    3.42
  -5  -2   5    1.83    2.94
  -5   2   5    6.40    3.56
  -5   2   5   -6.03    4.32
   5   2  -5    4.16    4.47
   4  -2  -5    2.12    4.10
  -4  -2   5    2.91    3.76
  -4  -2   5    4.03    3.15
  -4   2   5    3.40    2.94
   4   2  -5    2.39    3.83
  -3  -2   5   -3.09    2.77
   3  -2  -5   -3.17    3.16
  -3  -2   5    1.35    3.61
   3   2  -5   -0.04    3.71
  -3   2   5    1.41    4.09
  -3   2   5    1.32    2.77
   2  -2  -5   95.24    7.92
  -2  -2   5   99.07    7.93
  -2   2   5   84.39    6.98
  -2   2   5   98.33    7.27
   2   2  -5   94.64    8.53
   1  -2  -5    9.30    3.77
  -1  -2   5    6.10    3.26
  -1   2   5    6.72    2.74
   1   2  -5    7.55    3.92
  -1   2   5   -0.27    3.38
   0  -2  -5    7.71    4.11
   0  -2   5   10.01    3.40
   0   2   5    7.61    3.91
   0   2   5    8.49    3.14
   0   2  -5    6.90    4.69
  -1  -2  -5    5.82    4.17
   1  -2   5    2.37    3.61
  -1   2  -5   -1.11    4.54
   1   2   5   -2.96    2.66
   1   2   5    2.00    4.61
   2  -2   5   77.03    7.85
  -2  -2  -5   64.41    7.34
   2   2   5   74.08    6.43
  -2   2  -5   68.18   12.46
  -5  -3   5    2.04    3.81
   5  -3  -5    7.02    4.30
   5   3  -5   -3.15    4.33
  -5   3   5   -1.45    3.00
  -4  -3   5  129.57    9.11
  -4  -3   5  104.37    7.40
   4  -3  -5  114.72    9.29
  -4   3   5  121.92    7.95
   4   3  -5  112.57   10.17
   3  -3  -5    4.35    3.71
  -3  -3   5    6.10    3.86
  -3  -3   5    9.57    3.56
  -3   3   5    5.10    2.85
   3   3  -5    6.63    4.02
   2  -3  -5   89.09    7.49
  -2  -3   5  100.07    7.63
  -2   3   5   86.35    6.45
   2   3  -5   84.36    8.24
  -2   3   5   70.37    6.52
   1  -3  -5   19.72    4.36
  -1  -3   5   25.85    5.04
   1   3  -5   24.94    5.57
  -1   3   5   28.28    4.03
   0  -3   5   19.03    4.59
   0  -3  -5   15.91    4.08
   0   3  -5   19.28    5.02
   0   3   5   24.18    3.82
   0   3   5   21.62    3.57
   1  -3   5   48.03    6.52
  -1  -3  -5   43.91    5.73
   1   3   5   53.84    5.17
  -1   3  -5   39.41    6.61
   2  -3   5    3.66    3.69
   2   3   5    4.76    2.90
  -2   3  -5    9.35    5.75
   5  -4  -5   -4.32    6.33
  -5  -4   5   -2.61    4.11
   5   4  -5    7.75    5.22
   4  -4  -5   -1.51    3.51
  -4  -4   5   -4.86    3.35
  -4  -4   5   -0.04    3.16
   4   4  -5    3.18    4.76
  -4   4   5    6.76    3.14
  -4   4   5    4.57    4.64
   3  -4  -5  420.43   16.52
  -3  -4   5  406.83   17.36
  -3   4   5  377.02   15.27
  -3   4   5  394.63   15.34
   3   4  -5  378.41   17.52
   2  -4  -5  164.90    9.69
  -2  -4   5  158.00   10.06
  -2   4   5  166.78    8.44
   2   4  -5  173.64   11.39
   1  -4  -5    1.85    3.31
  -1  -4   5    2.03    3.30
   1   4  -5   -2.49    3.63
  -1   4   5    3.52    2.62
  -1   4   5   -0.48    2.25
   0  -4  -5    1.67    3.38
   0  -4   5    7.86    4.11
   0   4   5    3.42    2.19
   0   4   5    5.76    2.81
   0   4  -5    1.19    4.08
  -1  -4  -5   44.31    5.48
   1  -4   5   48.77    6.96
   1   4   5   45.04    4.42
  -1   4  -5   40.84    6.78
   5  -5  -5   -1.47    4.28
  -5  -5   5    1.73    4.11
  -5   5   5    2.64    3.41
   5   5  -5   16.92    9.81
  -4  -5   5   53.14    6.79
   4  -5  -5   65.78    7.23
  -4  -5   5   40.08    4.83
   4   5  -5   67.24    7.93
  -4   5   5   62.74    5.98
  -3  -5   5   25.44    5.02
   3  -5  -5   29.12    5.04
   3   5  -5   36.13    6.54
  -3   5   5   25.94    3.87
  -3   5   5   29.67    4.44
   2  -5  -5   -1.44    3.19
  -2  -5   5   -0.19    3.26
  -2   5   5    3.19    2.27
  -2   5   5   -3.26    2.50
   2   5  -5    3.22    3.98
  -1  -5   5   98.49    8.28
  -1   5   5   82.93    5.28
  -1   5   5   73.75    5.17
   1   5  -5   84.00   10.16
   0  -5   5    9.29    3.90
   0  -5  -5    2.50    3.28
   0   5   5    7.37    2.00
   0   5  -5   -0.89    4.35
   1  -5   5   45.89    6.66
  -1   5  -5   37.86    7.07
   1   5   5   42.57    3.63
  -4  -6   5    0.64    3.52
  -4  -6   5   -0.55    3.82
   4  -6  -5    5.23    4.36
   4   6  -5   -0.26    4.43
  -4   6   5    3.55    2.97
   3  -6  -5    9.13    3.76
  -3  -6   5    3.80    3.96
  -3   6   5    9.46    3.76
  -3   6   5   10.53    2.91
   3   6  -5   12.12    5.07
  -2  -6   5   27.96    5.16
   2  -6  -5   13.45    3.78
   2   6  -5   21.44    5.42
  -2   6   5   18.45    3.07
  -2   6   5   25.09    3.19
  -1  -6   5    6.06    3.99
  -1   6   5    4.01    1.85
  -1   6   5    5.25    1.86
   1   6  -5   13.39    4.84
   0  -6  -5   17.12    3.55
   0  -6   5   19.92    5.04
   0   6  -5   12.59    5.36
  -1   6  -5    7.77    5.26
  -4  -7   5   85.18    8.31
   4  -7  -5   77.15    8.00
  -4   7   5   77.25    6.51
   4   7  -5   77.83    8.86
   3  -7  -5   40.99    5.43
  -3  -7   5   40.56    6.70
  -3   7   5   53.52    4.93
   3   7  -5   52.16    6.95
  -2  -7   5   86.18    8.76
   2  -7  -5  101.14    7.04
   2   7  -5   87.81    9.48
  -2   7   5   86.22    4.98
  -1  -7   5   14.50    4.88
   1  -7  -5    5.07    3.07
   1   7  -5   13.96    5.10
   0  -7   5   11.35    4.79
   0   7  -5   10.29    4.95
   1  -7   5    3.30    5.08
  -1   7  -5   10.78    5.37
   4  -8  -5    0.29    5.61
  -4  -8   5   -1.22    4.26
   4   8  -5    0.53    5.12
  -4   8   5    1.13    2.81
  -3  -8   5   95.92    8.69
   3  -8  -5   94.91    7.78
   3   8  -5  105.51    9.34
  -3   8   5   92.81    5.87
  -2  -8   5  172.25   11.71
  -2   8   5  150.62    5.45
  -2   8   5  144.46    5.37
   2   8  -5  147.98   11.16
  -1  -8   5    8.19    4.56
   1   8  -5    3.00    4.97
   0  -8   5    6.70    4.47
   0   8  -5    5.93    5.59
  -3  -9   5   -2.57    5.07
   3   9  -5    5.03    4.92
  -3   9   5   13.36    2.67
  -2  -9   5   -1.92    4.64
   2   9  -5   -3.80    4.35
  -1  -9   5   12.87    5.72
   1   9  -5    8.98    5.45
   0   9  -5   19.00    5.89
   2  10  -5    5.12    5.34
   4   0  -6   18.21    5.55
  -4   0   6   14.18    4.12
   3   0  -6   -1.71    4.59
  -3   0   6    0.77    3.46
  -2   0   6  119.99    8.29
   2   0  -6  114.03    9.71
  -1   0   6   -0.99    3.43
   1   0  -6    1.76    4.22
   0   0   6  758.57   26.79
   0   0  -6  810.85   28.41
   4  -1  -6  537.05   23.95
  -4  -1   6  523.28   23.37
  -4   1   6  507.15   19.96
   4   1  -6  501.42   21.16
  -3  -1   6  217.85   11.68
   3  -1  -6  200.55   12.13
  -3   1   6  212.58   11.55
   3   1  -6  218.22   12.59
   2  -1  -6  114.74    9.64
  -2  -1   6  106.92    8.17
   2   1  -6  125.97   10.08
  -2   1   6  116.35    9.82
  -2   1   6   99.33    7.88
  -1  -1   6   56.01    6.92
   1  -1  -6   51.89    6.81
  -1   1   6   58.06    6.47
   1   1  -6   46.54    6.84
   0  -1  -6    7.44    5.32
   0  -1   6    7.90    3.97
   0   1  -6    1.92    5.53
   0   1   6   15.17    4.15
  -4  -2   6    8.77    7.22
   4  -2  -6    9.44    4.81
  -4   2   6    1.28    3.64
   4   2  -6    7.27    4.98
  -3  -2   6   78.11    7.58
   3  -2  -6   84.20    8.20
  -3   2   6   73.52    7.23
   3   2  -6   95.11    8.75
   2  -2  -6   19.76    5.13
  -2  -2   6   19.69    4.80
  -2   2   6   16.93    4.13
   2   2  -6    6.35    5.15
   1  -2  -6   25.74    9.93
  -1  -2   6   33.65    5.73
  -1   2   6   45.31    5.37
   1   2  -6   37.84    6.67
   0   2  -6   33.31    6.68
   0   2   6   24.39    4.42
  -4  -3   6  527.62   28.09
   4  -3  -6  573.46   22.72
  -4   3   6  617.42   23.36
   4   3  -6  618.23   23.93
  -3  -3   6   -5.38    3.41
   3  -3  -6  -11.22    3.90
  -3   3   6    2.29    3.32
   3   3  -6   -2.99    5.02
  -2  -3   6  192.35   11.55
   2  -3  -6  210.37   12.08
  -2   3   6  208.42   10.25
   2   3  -6  221.91   12.81
  -1  -3   6    6.23    4.21
   1  -3  -6    9.71    4.76
  -1   3   6    8.99    3.44
   1   3  -6   13.03    5.49
   0  -3  -6   40.80    7.43
   0  -3   6   22.67    5.12
   0   3  -6   13.86    6.13
   0   3   6   21.93    3.99
   4  -4  -6   -5.49    4.75
  -4  -4   6   10.50    4.30
   4   4  -6   17.40    6.17
   3  -4  -6    1.40    4.54
  -3  -4   6   11.86    4.49
   3   4  -6   -2.67    5.23
  -3   4   6    6.30    3.24
  -2  -4   6   40.74    6.32
   2  -4  -6   43.24    6.13
  -2   4   6   49.54    5.53
   2   4  -6   48.10    7.29
  -1  -4   6  239.69   14.13
   1  -4  -6  243.27   12.45
  -1   4   6  246.47   10.60
   1   4  -6  256.18   14.83
   0  -4   6  371.04   17.59
   0   4  -6  399.60   18.39
   0   4   6  387.33   13.72
   4  -5  -6   59.69    7.51
   4   5  -6   61.50    9.35
   3  -5  -6  172.60   11.37
  -3  -5   6  215.68   14.78
  -3   5   6  183.50    9.51
   3   5  -6  192.60   12.45
   2  -5  -6    3.72    4.57
  -2  -5   6   11.46    4.58
   2   5  -6   -2.62    4.79
  -2   5   6    6.21    2.88
  -1  -5   6   71.60    9.11
  -1   5   6   77.39    5.42
   1   5  -6   79.42    9.10
  -3  -6   6   88.16    8.80
   3   6  -6   94.72    9.52
  -3   6   6   76.11    6.25
  -2  -6   6   42.23    9.00
  -2   6   6   41.45    4.65
   2   6  -6   43.72    7.45
  -1  -6   6    6.99    4.64
   1   6  -6    3.44    5.12
   2   7  -6   21.29   10.22
   0   0   0    0.00    0.00


 _exptl_absorpt_process_details
)
 SADABS 2016/2: Krause, L., Herbst-Irmer, R., Sheldrick G.M. & Stalke D.,
 J. Appl. Cryst. 48 (2015) 3-10
)
 _exptl_absorpt_correction_type   multi-scan
 _exptl_absorpt_correction_T_max  0.0276
 _exptl_absorpt_correction_T_min  0.0117
 _exptl_special_details
)
 The following wavelength and cell were deduced by SADABS from the
 direction cosines etc. They are given here for emergency use only:
 CELL 0.71101    5.087   11.905    5.436   90.101  111.815   89.846
)

_computing_structure_solution     'SHELXT 2018/2 (Sheldrick, 2018)'
;
_shelx_hkl_checksum                74373
_olex2_submission_special_instructions  'No special instructions were received'
