# Supplementary material
Source: MDPI journal article supplement (https://www.mdpi.com/2073-4352/12/10/1342)
Supplement: s1 [file s1 › gamma_GlyCA.cif]

data_g_GlyCA
_audit_creation_date               2022-08-01
_audit_creation_method
;
Olex2 1.2
(compiled 2018.05.29 svn.r3508 for OlexSys, GUI svn.r5506)
;
_shelx_SHELXL_version_number       '2018/3'
_audit_contact_author_address      ?
_audit_contact_author_email        ?
_audit_contact_author_name         ''
_audit_contact_author_phone        ?
_publ_contact_author_id_orcid      ?
_publ_section_references
;
Bourhis, L.J., Dolomanov, O.V., Gildea, R.J., Howard, J.A.K., Puschmann, H.
 (2015). Acta Cryst. A71, 59-75.

Dolomanov, O.V., Bourhis, L.J., Gildea, R.J, Howard, J.A.K. & Puschmann, H.
 (2009), J. Appl. Cryst. 42, 339-341.

Sheldrick, G.M. (2015). Acta Cryst. C71, 3-8.
;
_chemical_name_common              ?
_chemical_name_systematic          ?
_chemical_formula_moiety           'C2 H5 N O2'
_chemical_formula_sum              'C2 H5 N O2'
_chemical_formula_weight           75.07
_chemical_absolute_configuration   ?
_chemical_melting_point            ?
_chemical_oxdiff_formula           'C10 H10 N5 O5'
loop_
  _atom_type_symbol
  _atom_type_description
  _atom_type_scat_dispersion_real
  _atom_type_scat_dispersion_imag
  _atom_type_scat_source
 'C' 'C' 0.0181 0.0091 'International Tables Vol C Tables 4.2.6.8 and 6.1.1.4'
 'H' 'H' 0.0000 0.0000 'International Tables Vol C Tables 4.2.6.8 and 6.1.1.4'
 'N' 'N' 0.0311 0.0180 'International Tables Vol C Tables 4.2.6.8 and 6.1.1.4'
 'O' 'O' 0.0492 0.0322 'International Tables Vol C Tables 4.2.6.8 and 6.1.1.4'

_shelx_space_group_comment
;
The symmetry employed for this shelxl refinement is uniquely defined
by the following loop, which should always be used as a source of
symmetry information in preference to the above space-group names.
They are only intended as comments.
;
_space_group_crystal_system        'trigonal'
_space_group_IT_number             144
_space_group_name_H-M_alt          'P 31'
_space_group_name_Hall             'P 31'
loop_
  _space_group_symop_operation_xyz
 'x, y, z'
 '-y, x-y, z+1/3'
 '-x+y, -x, z+2/3'

_cell_length_a                     6.9848(3)
_cell_length_b                     6.9848(3)
_cell_length_c                     5.4744(2)
_cell_angle_alpha                  90
_cell_angle_beta                   90
_cell_angle_gamma                  120
_cell_volume                       231.30(2)
_cell_formula_units_Z              3
_cell_measurement_reflns_used      1040
_cell_measurement_temperature      100.0(7)
_cell_measurement_theta_max        76.8740
_cell_measurement_theta_min        7.3130
_shelx_estimated_absorpt_T_max     ?
_shelx_estimated_absorpt_T_min     ?
_exptl_absorpt_coefficient_mu      1.250
_exptl_absorpt_correction_T_max    1.00000
_exptl_absorpt_correction_T_min    0.61396
_exptl_absorpt_correction_type     multi-scan
_exptl_absorpt_process_details
;
CrysAlisPro 1.171.41.118a (Rigaku Oxford Diffraction, 2021)
Empirical absorption correction using spherical harmonics,
implemented in SCALE3 ABSPACK scaling algorithm.
;
_exptl_absorpt_special_details     ?
_exptl_crystal_colour              colourless
_exptl_crystal_density_diffrn      1.617
_exptl_crystal_density_meas        ?
_exptl_crystal_density_method      ?
_exptl_crystal_description         prism
_exptl_crystal_F_000               120
_exptl_crystal_size_max            0.21
_exptl_crystal_size_mid            0.15
_exptl_crystal_size_min            0.09
_exptl_transmission_factor_max     ?
_exptl_transmission_factor_min     ?
_diffrn_reflns_av_R_equivalents    0.0446
_diffrn_reflns_av_unetI/netI       0.0300
_diffrn_reflns_Laue_measured_fraction_full  0.996
_diffrn_reflns_Laue_measured_fraction_max  0.991
_diffrn_reflns_limit_h_max         8
_diffrn_reflns_limit_h_min         -8
_diffrn_reflns_limit_k_max         8
_diffrn_reflns_limit_k_min         -8
_diffrn_reflns_limit_l_max         6
_diffrn_reflns_limit_l_min         -6
_diffrn_reflns_number              3120
_diffrn_reflns_point_group_measured_fraction_full  0.995
_diffrn_reflns_point_group_measured_fraction_max  0.974
_diffrn_reflns_theta_full          67.684
_diffrn_reflns_theta_max           77.178
_diffrn_reflns_theta_min           7.322
_diffrn_ambient_environment        N~2~
_diffrn_ambient_temperature        100.0(7)
_diffrn_detector                   'Hybrid Pixel Array Detector'
_diffrn_detector_area_resol_mean   10.0000
_diffrn_detector_type              HyPix
_diffrn_measured_fraction_theta_full  0.996
_diffrn_measured_fraction_theta_max  0.991
_diffrn_measurement_details
;
List of Runs (angles in degrees, time in seconds):

  # Type    Start    End  Width  t~exp~   \w     \q     \k     \f   Frames
--------------------------------------------------------------------------
  1  \w     26.00  70.00   0.50    0.05    --   47.35  77.00-150.00   88
  2  \w     31.00  72.00   0.50    0.05    --   47.35  77.00 -60.00   82
  3  \w    -23.00  25.00   0.50    0.05    --  -47.35  19.00 -60.00   96
  4  \w    -26.00  -1.00   0.50    0.05    --  -47.35  19.00 150.00   50
  5  \w    -37.00  -3.00   0.50    0.05    --  -47.35  40.00 157.00   68
  6  \w     41.00  91.00   0.50    0.05    --   47.35  40.00 157.00  100
  7  \w    103.00 133.00   0.50    0.06    --  113.25  40.00 157.00   60
  8  \w    141.00 167.00   0.50    0.06    --  113.25  40.00 157.00   52
  9  \w    104.00 147.00   0.50    0.06    --  113.25  15.00-150.00   86
 10  \w     78.00 119.00   0.50    0.05    --   47.35 125.00 -60.00   82
 11  \w     10.00  42.00   0.50    0.05    --   47.35 -40.00   3.00   64
 12  \w     45.00  71.00   0.50    0.06    --  113.25 -61.00   0.00   52
 13  \w     44.00  71.00   0.50    0.06    --  113.25 -61.00  30.00   54
 14  \w     42.00  67.00   0.50    0.06    --  113.25 -61.00  90.00   50
 15  \w     45.00  70.00   0.50    0.06    --  113.25 -61.00 120.00   50
 16  \w     48.00  76.00   0.50    0.06    --  113.25 -94.00  90.00   56
 17  \w     43.00  69.00   0.50    0.06    --  113.25-125.00 150.00   52
 18  \w     81.00 106.00   0.50    0.06    --  113.25 -94.00  90.00   50
 19  \w     79.00 104.00   0.50    0.06    --  113.25 -94.00  30.00   50
 20  \w     48.00  92.00   0.50    0.06    --  113.25 -94.00   0.00   88
 21  \w   -105.00 -79.00   0.50    0.06    -- -106.00  77.00 -60.00   52
 22  \w    -68.00 -38.00   0.50    0.06    -- -106.00  77.00 -60.00   60
 23  \w    -70.00 -44.00   0.50    0.06    -- -106.00  61.00 -30.00   52
 24  \w    -69.00 -34.00   0.50    0.06    -- -106.00  61.00   0.00   70
 25  \w    -69.00 -44.00   0.50    0.06    -- -106.00  61.00 -60.00   50
 26  \w    -68.00 -41.00   0.50    0.06    -- -106.00  61.00 -90.00   54
 27  \w    -70.00 -38.00   0.50    0.06    -- -106.00  61.00-120.00   64
 28  \w    -66.00 -38.00   0.50    0.06    -- -106.00  61.00-180.00   56
 29  \w   -135.00-101.00   0.50    0.06    -- -106.00 -40.00   3.00   68
 30  \w   -163.00-131.00   0.50    0.06    -- -106.00 -77.00 -60.00   64
 31  \w   -117.00 -92.00   0.50    0.06    -- -106.00 -77.00 -90.00   50
 32  \w   -121.50 -84.00   0.50    0.06    -- -106.00 -77.00-120.00   75
;
_diffrn_measurement_device         'four-circle diffractometer'
_diffrn_measurement_device_type   
 'XtaLAB Synergy, Single source at home/near, HyPix'
_diffrn_measurement_method         '\w scans'
_diffrn_orient_matrix_type        
 'CrysAlisPro convention (1999,Acta A55,543-557)'
_diffrn_orient_matrix_UB_11        0.1907910000
_diffrn_orient_matrix_UB_12        0.0764160000
_diffrn_orient_matrix_UB_13        -0.1845784000
_diffrn_orient_matrix_UB_21        -0.1534137000
_diffrn_orient_matrix_UB_22        -0.1869926000
_diffrn_orient_matrix_UB_23        -0.1751576000
_diffrn_orient_matrix_UB_31        -0.0699186000
_diffrn_orient_matrix_UB_32        0.1552976000
_diffrn_orient_matrix_UB_33        -0.1198695000
_diffrn_radiation_monochromator    mirror
_diffrn_radiation_probe            x-ray
_diffrn_radiation_type             CuK\a
_diffrn_radiation_wavelength       1.54184
_diffrn_source                     'micro-focus sealed X-ray tube'
_diffrn_source_type                'PhotonJet (Cu) X-ray Source'
_reflns_Friedel_coverage           0.966
_reflns_Friedel_fraction_full      0.993
_reflns_Friedel_fraction_max       0.958
_reflns_number_gt                  645
_reflns_number_total               645
_reflns_odcompleteness_completeness  99.49
_reflns_odcompleteness_iscentric   1
_reflns_odcompleteness_theta       72.42
_reflns_special_details
;
 Reflections were merged by SHELXL according to the crystal
 class for the calculation of statistics and refinement.
 
 _reflns_Friedel_fraction is defined as the number of unique
 Friedel pairs measured divided by the number that would be
 possible theoretically, ignoring centric projections and
 systematic absences. Completness statistics refer to single and
 composite reflections containing twin component 1 only.
;
_reflns_threshold_expression       'I > 2\s(I)'
_computing_cell_refinement         'CrysAlisPro 1.171.41.118a (Rigaku OD, 2021)'
_computing_data_collection         'CrysAlisPro 1.171.41.118a (Rigaku OD, 2021)'
_computing_data_reduction          'CrysAlisPro 1.171.41.118a (Rigaku OD, 2021)'
_computing_molecular_graphics      'Olex2 (Dolomanov et al., 2009)'
_computing_publication_material    'Olex2 (Dolomanov et al., 2009)'
_computing_structure_refinement    'ShelXL (Sheldrick, 2015)'
_computing_structure_solution      'olex2.solve (Bourhis et al., 2015)'
_refine_diff_density_max           0.162
_refine_diff_density_min           -0.199
_refine_diff_density_rms           0.049
_refine_ls_abs_structure_details
;
 Flack x determined using 315 quotients [(I+)-(I-)]/[(I+)+(I-)]
 (Parsons, Flack and Wagner, Acta Cryst. B69 (2013) 249-259).
;
_refine_ls_abs_structure_Flack     -0.07(17)
_refine_ls_extinction_coef         .
_refine_ls_extinction_method       none
_refine_ls_goodness_of_fit_ref     1.090
_refine_ls_hydrogen_treatment      constr
_refine_ls_matrix_type             full
_refine_ls_number_parameters       48
_refine_ls_number_reflns           645
_refine_ls_number_restraints       1
_refine_ls_R_factor_all            0.0299
_refine_ls_R_factor_gt             0.0299
_refine_ls_restrained_S_all        1.089
_refine_ls_shift/su_max            0.000
_refine_ls_shift/su_mean           0.000
_refine_ls_structure_factor_coef   Fsqd
_refine_ls_weighting_details      
 'w=1/[\s^2^(Fo^2^)+(0.0442P)^2^] where P=(Fo^2^+2Fc^2^)/3'
_refine_ls_weighting_scheme        calc
_refine_ls_wR_factor_gt            0.0735
_refine_ls_wR_factor_ref           0.0735
_refine_special_details
;
 Refined as a 2-component twin.
;
_olex2_refinement_description
;
1. Twinned data refinement
 Scales: 0.500(5)
 0.500(5)
2. Fixed Uiso
 At 1.2 times of:
  All C(H,H) groups, All N(H,H,H) groups
3.a Secondary CH2 refined with riding coordinates:
 C2(H2A,H2B)
3.b Idealised Me refined as rotating group:
 N1(H1A,H1B,H1C)
;
_atom_sites_solution_hydrogens     geom
_atom_sites_solution_primary       iterative
_atom_sites_solution_secondary     ?
loop_
  _atom_site_label
  _atom_site_type_symbol
  _atom_site_fract_x
  _atom_site_fract_y
  _atom_site_fract_z
  _atom_site_U_iso_or_equiv
  _atom_site_adp_type
  _atom_site_occupancy
  _atom_site_site_symmetry_order
  _atom_site_calc_flag
  _atom_site_refinement_flags_posn
  _atom_site_refinement_flags_adp
  _atom_site_refinement_flags_occupancy
  _atom_site_disorder_assembly
  _atom_site_disorder_group
 O2 O 0.5538(4) 0.6543(4) 0.2728(4) 0.0142(4) Uani 1 1 d . . . . .
 O1 O 0.8805(4) 0.6702(4) 0.2414(4) 0.0182(5) Uani 1 1 d . . . . .
 C1 C 0.7276(5) 0.6691(5) 0.3604(5) 0.0129(5) Uani 1 1 d . . . . .
 N1 N 0.5502(4) 0.6394(4) 0.7627(5) 0.0133(5) Uani 1 1 d . . . . .
 H1A H 0.503610 0.733629 0.713027 0.016 Uiso 1 1 calc GR . . . .
 H1B H 0.573370 0.652301 0.926942 0.016 Uiso 1 1 calc GR . . . .
 H1C H 0.445380 0.498071 0.725872 0.016 Uiso 1 1 calc GR . . . .
 C2 C 0.7588(5) 0.6947(6) 0.6364(5) 0.0154(6) Uani 1 1 d . . . . .
 H2A H 0.812898 0.596533 0.696507 0.018 Uiso 1 1 calc R . . . .
 H2B H 0.872097 0.848977 0.675272 0.018 Uiso 1 1 calc R . . . .

loop_
  _atom_site_aniso_label
  _atom_site_aniso_U_11
  _atom_site_aniso_U_22
  _atom_site_aniso_U_33
  _atom_site_aniso_U_23
  _atom_site_aniso_U_13
  _atom_site_aniso_U_12
 O2 0.0142(11) 0.0190(10) 0.0104(8) -0.0005(11) -0.0017(10) 0.0091(9)
 O1 0.0186(12) 0.0261(12) 0.0154(10) 0.0026(10) 0.0028(10) 0.0153(11)
 C1 0.0155(14) 0.0121(14) 0.0113(11) 0.0001(12) -0.0005(12) 0.0071(13)
 N1 0.0147(13) 0.0156(13) 0.0103(9) -0.0027(11) -0.0023(11) 0.0081(10)
 C2 0.0128(14) 0.0194(16) 0.0131(14) -0.0001(12) -0.0003(10) 0.0075(15)

_geom_special_details
;
 All esds (except the esd in the dihedral angle between two l.s. planes)
 are estimated using the full covariance matrix.  The cell esds are taken
 into account individually in the estimation of esds in distances, angles
 and torsion angles; correlations between esds in cell parameters are only
 used when they are defined by crystal symmetry.  An approximate (isotropic)
 treatment of cell esds is used for estimating esds involving l.s. planes.
;
loop_
  _geom_bond_atom_site_label_1
  _geom_bond_atom_site_label_2
  _geom_bond_distance
  _geom_bond_site_symmetry_2
  _geom_bond_publ_flag
 O2 C1 1.260(4) . ?
 O1 C1 1.248(4) . ?
 C1 C2 1.524(4) . ?
 N1 H1A 0.9100 . ?
 N1 H1B 0.9100 . ?
 N1 H1C 0.9100 . ?
 N1 C2 1.479(4) . ?
 C2 H2A 0.9900 . ?
 C2 H2B 0.9900 . ?

loop_
  _geom_angle_atom_site_label_1
  _geom_angle_atom_site_label_2
  _geom_angle_atom_site_label_3
  _geom_angle
  _geom_angle_site_symmetry_1
  _geom_angle_site_symmetry_3
  _geom_angle_publ_flag
 O2 C1 C2 117.6(3) . . ?
 O1 C1 O2 126.0(3) . . ?
 O1 C1 C2 116.4(2) . . ?
 H1A N1 H1B 109.5 . . ?
 H1A N1 H1C 109.5 . . ?
 H1B N1 H1C 109.5 . . ?
 C2 N1 H1A 109.5 . . ?
 C2 N1 H1B 109.5 . . ?
 C2 N1 H1C 109.5 . . ?
 C1 C2 H2A 109.3 . . ?
 C1 C2 H2B 109.3 . . ?
 N1 C2 C1 111.6(2) . . ?
 N1 C2 H2A 109.3 . . ?
 N1 C2 H2B 109.3 . . ?
 H2A C2 H2B 108.0 . . ?

loop_
  _geom_torsion_atom_site_label_1
  _geom_torsion_atom_site_label_2
  _geom_torsion_atom_site_label_3
  _geom_torsion_atom_site_label_4
  _geom_torsion
  _geom_torsion_site_symmetry_1
  _geom_torsion_site_symmetry_2
  _geom_torsion_site_symmetry_3
  _geom_torsion_site_symmetry_4
  _geom_torsion_publ_flag
 O2 C1 C2 N1 15.0(4) . . . . ?
 O1 C1 C2 N1 -166.7(3) . . . . ?

_shelx_res_file
;
TITL gly_ca_auto_a.res in P3(1)
    gly_ca_auto.res
    created by SHELXL-2018/3 at 14:50:41 on 01-Aug-2022
REM Old TITL Gly_CA_auto in P32 #145
REM SHELXT solution in P3(1): R1 0.197, Rweak 0.114, Alpha 0.087
REM <I/s> 0.347 for 4 systematic absences, Orientation as input
REM Flack x = 0.342 ( 0.148 ) from 226 Parsons' quotients
REM Formula found by SHELXT: C3 O2
CELL 1.54184 6.9848 6.9848 5.4744 90 90 120
ZERR 3 0.0003 0.0003 0.0002 0 0 0
LATT -1
SYMM -Y,+X-Y,0.333+Z
SYMM +Y-X,-X,0.667+Z
SFAC C H N O
UNIT 6 15 3 6

L.S. 4
PLAN  5
TEMP -173
CONF
list 4
MORE -1
BOND $H
fmap 2 53
acta
TWIN 0 1 0 1 0 0 0 0 -1 2
REM <olex2.extras>
REM <HklSrc "%.\\Gly_CA_auto_twin01.hkl">
REM </olex2.extras>

WGHT    0.044200
BASF   0.50000
FVAR       2.52310
O2    4    0.553790    0.654310    0.272750    11.00000    0.01420    0.01903 =
         0.01041   -0.00049   -0.00172    0.00911
O1    4    0.880540    0.670171    0.241396    11.00000    0.01864    0.02613 =
         0.01542    0.00262    0.00277    0.01529
C1    1    0.727558    0.669132    0.360380    11.00000    0.01554    0.01205 =
         0.01126    0.00011   -0.00046    0.00705
N1    3    0.550234    0.639350    0.762701    11.00000    0.01469    0.01555 =
         0.01029   -0.00274   -0.00233    0.00810
AFIX 137
H1A   2    0.503610    0.733629    0.713027    11.00000   -1.20000
H1B   2    0.573370    0.652301    0.926942    11.00000   -1.20000
H1C   2    0.445380    0.498071    0.725872    11.00000   -1.20000
AFIX   0
C2    1    0.758824    0.694690    0.636354    11.00000    0.01279    0.01943 =
         0.01309   -0.00013   -0.00027    0.00747
AFIX  23
H2A   2    0.812898    0.596533    0.696507    11.00000   -1.20000
H2B   2    0.872097    0.848977    0.675272    11.00000   -1.20000
AFIX   0
HKLF 4


REM  gly_ca_auto_a.res in P3(1)
REM wR2 = 0.0735, GooF = S = 1.090, Restrained GooF = 1.089 for all data
REM R1 = 0.0299 for 645 Fo > 4sig(Fo) and 0.0299 for all 645 data
REM 48 parameters refined using 1 restraints

END

WGHT      0.0442      0.0000

REM Highest difference peak  0.162,  deepest hole -0.199,  1-sigma level  0.049
Q1    1   0.7660  0.3967  0.4951  11.00000  0.05    0.16
Q2    1   0.5575  0.5028  0.3860  11.00000  0.05    0.16
Q3    1   0.9292  0.5535  0.1642  11.00000  0.05    0.15
Q4    1   1.0618  0.7408  0.8335  11.00000  0.05    0.14
Q5    1   1.0467  0.6910  0.2512  11.00000  0.05    0.13
;
_shelx_res_checksum                24266
_shelx_hkl_file
;
   0   0  -1    1.67    1.55  -2
   0   0   1    1.67    1.55   1
   0   0  -2    0.55    1.77  -2
   0   0   2    0.55    1.77   1
   0   0   4   -2.06    3.83  -2
   0   0  -4   -2.06    3.83   1
   0   0   4    1.55    3.54  -2
   0   0  -4    1.55    3.54   1
   0   0   4   -1.37    3.14  -2
   0   0  -4   -1.37    3.14   1
   0   0   4   -1.18    2.70  -2
   0   0  -4   -1.18    2.70   1
   0   0   5   -2.39    4.45  -2
   0   0  -5   -2.39    4.45   1
   0   0   6  455.88   29.48  -2
   0   0  -6  455.88   29.48   1
  -1   0   6   65.48    9.95  -2
   0  -1  -6   65.48    9.95   1
   1  -1   6   59.84   11.94  -2
  -1   1  -6   59.84   11.94   1
   0   1   6   60.08   11.06  -2
   1   0  -6   60.08   11.06   1
  -1   0   5   42.37   11.51  -2
   0  -1  -5   42.37   11.51   1
   1  -1   5   20.34   12.97  -2
  -1   1  -5   20.34   12.97   1
   0   1   5   38.13   13.80  -2
   1   0  -5   38.13   13.80   1
  -1   0   5   29.20    8.85  -2
   0  -1  -5   29.20    8.85   1
   1  -1   5   34.69   10.79  -2
  -1   1  -5   34.69   10.79   1
   0   1   5   48.28   13.32  -2
   1   0  -5   48.28   13.32   1
  -1   0   5   24.89   12.28  -2
   0  -1  -5   24.89   12.28   1
   0   1   4  191.57   22.29  -2
   1   0  -4  191.57   22.29   1
   1  -1   4  138.78   17.28  -2
  -1   1  -4  138.78   17.28   1
   1  -1   4  171.29   21.93  -2
  -1   1  -4  171.29   21.93   1
  -1   0   4  134.87   23.56  -2
   0  -1  -4  134.87   23.56   1
   0   1   4  177.43   24.35  -2
   1   0  -4  177.43   24.35   1
  -1   0   4  155.10   20.68  -2
   0  -1  -4  155.10   20.68   1
  -1   0   4  162.77   18.88  -2
   0  -1  -4  162.77   18.88   1
  -1   0   4  184.25   24.69  -2
   0  -1  -4  184.25   24.69   1
   1  -1   4  164.19   25.12  -2
  -1   1  -4  164.19   25.12   1
   0   1   4  184.08   25.57  -2
   1   0  -4  184.08   25.57   1
  -1   0   3  133.19   18.96  -2
   0  -1  -3  133.19   18.96   1
   1  -1   3   95.45   15.88  -2
  -1   1  -3   95.45   15.88   1
   1   0  -3  134.93   17.47  -2
   0   1   3  134.93   17.47   1
   1  -1   2 9668.26  125.23  -2
  -1   1  -2 9668.26  125.23   1
   1   0  -2 9487.07  126.67  -2
   0   1   2 9487.07  126.67   1
  -1   0   2 9696.23  128.47  -2
   0  -1  -2 9696.23  128.47   1
  -1   0   1 1483.80   36.05  -2
   0  -1  -1 1483.80   36.05   1
   1  -1   1 1411.89   28.96  -2
  -1   1  -1 1411.89   28.96   1
   1  -1   1 1408.93   33.58  -2
  -1   1  -1 1408.93   33.58   1
   1   0  -1 1496.83   37.60  -2
   0   1   1 1496.83   37.60   1
   1  -1   1 1427.32   32.62  -2
  -1   1  -1 1427.32   32.62   1
  -1   0   1 1367.05   33.21  -2
   0  -1  -1 1367.05   33.21   1
   0   1   1 1421.11   29.57  -2
   1   0  -1 1421.11   29.57   1
  -1   0   1 1450.17   33.70  -2
   0  -1  -1 1450.17   33.70   1
  -1   0   0  184.01    7.75  -2
   0  -1   0  184.01    7.75   1
   1   0   0  193.39    7.46  -2
   0   1   0  193.39    7.46   1
   0   1   0  191.76   10.37  -2
   1   0   0  191.76   10.37   1
   1  -1   0  173.79    8.45  -2
  -1   1   0  173.79    8.45   1
  -1   1   0  179.77    7.24  -2
   1  -1   0  179.77    7.24   1
   1  -1  -1 2260.15   45.38  -2
  -1   1   1 2260.15   45.38   1
   0  -1   1 2228.92   44.41  -2
  -1   0  -1 2228.92   44.41   1
  -1   0  -1 2240.09   34.95  -2
   0  -1   1 2240.09   34.95   1
   0  -1   1 2232.70   44.31  -2
  -1   0  -1 2232.70   44.31   1
   0  -1   2  211.20   17.99  -2
  -1   0  -2  211.20   17.99   1
   0   1  -2  234.32   17.13  -2
   1   0   2  234.32   17.13   1
   0  -1   2  203.79   18.20  -2
  -1   0  -2  203.79   18.20   1
   0  -1   3   56.27   12.70  -2
  -1   0  -3   56.27   12.70   1
   0   1  -3   48.35    9.38  -2
   1   0   3   48.35    9.38   1
  -1   1   4  394.00   31.16  -2
   1  -1  -4  394.00   31.16   1
   0  -1   4  422.86   35.25  -2
  -1   0  -4  422.86   35.25   1
   0  -1   4  353.90   29.92  -2
  -1   0  -4  353.90   29.92   1
   1   0   4  474.46   39.49  -2
   0   1  -4  474.46   39.49   1
  -1   1   4  353.01   35.08  -2
   1  -1  -4  353.01   35.08   1
  -1   1   4  472.34   33.94  -2
   1  -1  -4  472.34   33.94   1
  -1   1   4  417.07   37.30  -2
   1  -1  -4  417.07   37.30   1
   0  -1   4  442.65   40.27  -2
  -1   0  -4  442.65   40.27   1
   0  -1   5  239.59   26.09  -2
  -1   0  -5  239.59   26.09   1
  -1   1   5  293.28   32.55  -2
   1  -1  -5  293.28   32.55   1
   0  -1   5  259.46   33.68  -2
  -1   0  -5  259.46   33.68   1
   1   0   5  284.78   35.91  -2
   0   1  -5  284.78   35.91   1
  -1   1   5  260.38   33.87  -2
   1  -1  -5  260.38   33.87   1
   0  -1   5  236.69   27.91  -2
  -1   0  -5  236.69   27.91   1
  -1   1   5  226.53   25.41  -2
   1  -1  -5  226.53   25.41   1
   1   0   6  113.36   16.08  -2
   0   1  -6  113.36   16.08   1
   0  -1   6   97.20   13.61  -2
  -1   0  -6   97.20   13.61   1
  -1   1   6   90.42   11.62  -2
   1  -1  -6   90.42   11.62   1
   1   1   0 9999.00   99.82  -2
   1   1   0 9999.00   99.82   1
  -2   1   0 9940.08   89.77  -2
   1  -2   0 9940.08   89.77   1
  -2   1   1  733.68   31.72  -2
   1  -2  -1  733.68   31.72   1
   1  -2   1  732.17   28.68  -2
  -2   1  -1  732.17   28.68   1
  -2   1  -2 1169.41   29.85  -2
   1  -2   2 1169.41   29.85   1
   1  -2   2 1169.88   42.03  -2
  -2   1  -2 1169.88   42.03   1
   1   1  -2 1190.32   46.12  -2
   1   1   2 1190.32   46.12   1
   1  -2   2 1047.77   43.94  -2
  -2   1  -2 1047.77   43.94   1
   1  -2   2 1176.36   44.99  -2
  -2   1  -2 1176.36   44.99   1
   1  -2   3  913.39   48.92  -2
  -2   1  -3  913.39   48.92   1
   1   1  -3  956.90   49.58  -2
   1   1   3  956.90   49.58   1
  -2   1   3 1031.88   52.50  -2
   1  -2  -3 1031.88   52.50   1
   1   1   4  546.01   43.96  -2
   1   1  -4  546.01   43.96   1
   1   1   4  514.17   39.05  -2
   1   1  -4  514.17   39.05   1
   1   1  -4  562.18   40.55  -2
   1   1   4  562.18   40.55   1
   1  -2   4  587.55   35.64  -2
  -2   1  -4  587.55   35.64   1
   1  -2   4  527.12   32.03  -2
  -2   1  -4  527.12   32.03   1
  -2   1   4  559.74   37.83  -2
   1  -2  -4  559.74   37.83   1
  -2   1   4  557.75   37.56  -2
   1  -2  -4  557.75   37.56   1
  -2   1   4  539.05   44.80  -2
   1  -2  -4  539.05   44.80   1
   1  -2   4  553.02   44.65  -2
  -2   1  -4  553.02   44.65   1
  -2   1   4  648.43   43.27  -2
   1  -2  -4  648.43   43.27   1
   1  -2   4  595.46   43.23  -2
  -2   1  -4  595.46   43.23   1
   1  -2   4  520.16   37.23  -2
  -2   1  -4  520.16   37.23   1
   1  -2   5  163.42   24.06  -2
  -2   1  -5  163.42   24.06   1
  -2   1   5   92.70   15.76  -2
   1  -2  -5   92.70   15.76   1
   1   1   5  134.36   25.80  -2
   1   1  -5  134.36   25.80   1
   1  -2   5  137.38   20.00  -2
  -2   1  -5  137.38   20.00   1
   1   1   6   84.00   13.14  -2
   1   1  -6   84.00   13.14   1
   1  -2   6   84.27   13.05  -2
  -2   1  -6   84.27   13.05   1
   2  -1   0 9767.73   89.50  -2
  -1   2   0 9767.73   89.50   1
  -1   2   0 9724.81   99.30  -2
   2  -1   0 9724.81   99.30   1
   2  -1  -1  746.05   31.25  -2
  -1   2   1  746.05   31.25   1
  -1   2   1  683.32   27.27  -2
   2  -1  -1  683.32   27.27   1
  -1  -1  -1  754.28   27.38  -2
  -1  -1   1  754.28   27.38   1
  -1  -1   1  721.26   10.26  -2
  -1  -1  -1  721.26   10.26   1
  -1  -1   1  775.61   29.13  -2
  -1  -1  -1  775.61   29.13   1
  -1  -1   1  781.38   24.01  -2
  -1  -1  -1  781.38   24.01   1
  -1   2  -2 1136.26   32.05  -2
   2  -1   2 1136.26   32.05   1
   2  -1  -2 1035.27   24.94  -2
  -1   2   2 1035.27   24.94   1
  -1   2   2 1339.72   50.23  -2
   2  -1  -2 1339.72   50.23   1
  -1  -1   2 1332.87   48.31  -2
  -1  -1  -2 1332.87   48.31   1
  -1  -1   2 1137.08   45.23  -2
  -1  -1  -2 1137.08   45.23   1
  -1  -1   2 1313.50   48.04  -2
  -1  -1  -2 1313.50   48.04   1
   2  -1  -2 1178.83   47.81  -2
  -1   2   2 1178.83   47.81   1
   2  -1   3 1005.01   50.80  -2
  -1   2  -3 1005.01   50.80   1
   2  -1  -3  988.31   52.66  -2
  -1   2   3  988.31   52.66   1
  -1  -1   3 1096.75   54.38  -2
  -1  -1  -3 1096.75   54.38   1
  -1  -1   4  589.12   41.50  -2
  -1  -1  -4  589.12   41.50   1
  -1   2   4  500.28   42.12  -2
   2  -1  -4  500.28   42.12   1
  -1  -1   4  567.07   43.18  -2
  -1  -1  -4  567.07   43.18   1
   2  -1   4  550.55   44.62  -2
  -1   2  -4  550.55   44.62   1
  -1   2   4  549.76   45.58  -2
   2  -1  -4  549.76   45.58   1
  -1  -1   4  601.00   47.52  -2
  -1  -1  -4  601.00   47.52   1
  -1  -1   4  532.29   35.67  -2
  -1  -1  -4  532.29   35.67   1
   2  -1   4  526.69   35.93  -2
  -1   2  -4  526.69   35.93   1
   2  -1   5  131.78   22.85  -2
  -1   2  -5  131.78   22.85   1
  -1   2   5  112.56   23.52  -2
   2  -1  -5  112.56   23.52   1
  -1   2   5  106.74   20.76  -2
   2  -1  -5  106.74   20.76   1
   2  -1   5  110.96   16.06  -2
  -1   2  -5  110.96   16.06   1
  -1  -1   5  117.17   20.25  -2
  -1  -1  -5  117.17   20.25   1
  -1  -1   5  130.18   17.85  -2
  -1  -1  -5  130.18   17.85   1
  -1   2   6   73.71    9.78  -2
   2  -1  -6   73.71    9.78   1
   2  -1   6   82.00   13.13  -2
  -1   2  -6   82.00   13.13   1
  -1  -1   6   88.18   12.51  -2
  -1  -1  -6   88.18   12.51   1
   2  -2   6  100.87   13.98  -2
  -2   2  -6  100.87   13.98   1
   2  -2   6  102.11   13.45  -2
  -2   2  -6  102.11   13.45   1
  -2   0   6   70.45    9.72  -2
   0  -2  -6   70.45    9.72   1
   2  -2   5   80.24   16.00  -2
  -2   2  -5   80.24   16.00   1
  -2   0   5   97.22   14.16  -2
   0  -2  -5   97.22   14.16   1
   0   2   5   97.82   20.00  -2
   2   0  -5   97.82   20.00   1
   2  -2   5  116.17   16.66  -2
  -2   2  -5  116.17   16.66   1
  -2   0   5   99.01   17.02  -2
   0  -2  -5   99.01   17.02   1
   0   2   5  114.80   20.44  -2
   2   0  -5  114.80   20.44   1
   2  -2   4  134.51   21.89  -2
  -2   2  -4  134.51   21.89   1
   2  -2   4   86.98   12.59  -2
  -2   2  -4   86.98   12.59   1
   0   2   4  123.87   22.09  -2
   2   0  -4  123.87   22.09   1
  -2   0   4   98.50   15.26  -2
   0  -2  -4   98.50   15.26   1
   2   0  -4  124.88   21.50  -2
   0   2   4  124.88   21.50   1
  -2   0   4  102.93   19.68  -2
   0  -2  -4  102.93   19.68   1
   0   2   4   93.11   18.99  -2
   2   0  -4   93.11   18.99   1
   2  -2   4   82.90   14.58  -2
  -2   2  -4   82.90   14.58   1
   2  -2   3  685.71   39.47  -2
  -2   2  -3  685.71   39.47   1
   2  -2   3  694.52   41.35  -2
  -2   2  -3  694.52   41.35   1
  -2   0   3  689.19   42.57  -2
   0  -2  -3  689.19   42.57   1
   2   0  -3  738.90   45.88  -2
   0   2   3  738.90   45.88   1
   0   2   3  700.28   35.92  -2
   2   0  -3  700.28   35.92   1
   2  -2   2 4728.42   86.67  -2
  -2   2  -2 4728.42   86.67   1
   2   0  -2 4830.82  101.65  -2
   0   2   2 4830.82  101.65   1
  -2   0   2 4701.14   97.07  -2
   0  -2  -2 4701.14   97.07   1
  -2   0   2 4679.64   70.40  -2
   0  -2  -2 4679.64   70.40   1
   0   2   2 4818.29   85.65  -2
   2   0  -2 4818.29   85.65   1
  -2   0   2 4814.63   87.07  -2
   0  -2  -2 4814.63   87.07   1
  -2   0   1  761.49   26.52  -2
   0  -2  -1  761.49   26.52   1
   2  -2   1  740.30   26.11  -2
  -2   2  -1  740.30   26.11   1
   0   2   1  741.15   34.14  -2
   2   0  -1  741.15   34.14   1
  -2   0   1  757.30   30.05  -2
   0  -2  -1  757.30   30.05   1
   0   2   1  756.15   24.61  -2
   2   0  -1  756.15   24.61   1
   0   2   0 2387.44   54.25  -2
   2   0   0 2387.44   54.25   1
  -2   2   0 2380.29   37.98  -2
   2  -2   0 2380.29   37.98   1
   2   0   0 2351.81   37.51  -2
   0   2   0 2351.81   37.51   1
  -2   2   1  895.10   35.38  -2
   2  -2  -1  895.10   35.38   1
  -2   0  -1  813.46   29.84  -2
   0  -2   1  813.46   29.84   1
   0  -2   1  890.77   23.01  -2
  -2   0  -1  890.77   23.01   1
   2  -2  -1  796.91   26.52  -2
  -2   2   1  796.91   26.52   1
  -2   0  -2  691.95   27.30  -2
   0  -2   2  691.95   27.30   1
   2  -2  -2  671.88   26.72  -2
  -2   2   2  671.88   26.72   1
   0  -2   2  671.67   36.69  -2
  -2   0  -2  671.67   36.69   1
   0  -2   2  682.55   35.39  -2
  -2   0  -2  682.55   35.39   1
  -2   2   3  603.72   35.81  -2
   2  -2  -3  603.72   35.81   1
   0  -2   3  591.10   41.35  -2
  -2   0  -3  591.10   41.35   1
   0   2  -3  523.34   32.98  -2
   2   0   3  523.34   32.98   1
   2  -2  -3  513.41   25.47  -2
  -2   2   3  513.41   25.47   1
   0  -2   4 1734.67   67.55  -2
  -2   0  -4 1734.67   67.55   1
   0  -2   4 1964.07   81.65  -2
  -2   0  -4 1964.07   81.65   1
  -2   2   4 1742.94   74.40  -2
   2  -2  -4 1742.94   74.40   1
   2   0   4 1714.62   73.74  -2
   0   2  -4 1714.62   73.74   1
  -2   2   4 1635.45   78.49  -2
   2  -2  -4 1635.45   78.49   1
   0  -2   5   65.06   15.29  -2
  -2   0  -5   65.06   15.29   1
   2   0   5   48.69   10.91  -2
   0   2  -5   48.69   10.91   1
  -2   2   5   55.19   12.54  -2
   2  -2  -5   55.19   12.54   1
   0  -2   5   38.64   10.66  -2
  -2   0  -5   38.64   10.66   1
   2   0   6   14.30    6.01  -2
   0   2  -6   14.30    6.01   1
   0  -2   6   19.72    6.18  -2
  -2   0  -6   19.72    6.18   1
   1  -3  -6  428.48   26.91  -2
  -3   1   6  428.48   26.91   1
   2  -3   6  362.65   18.79  -2
  -3   2  -6  362.65   18.79   1
   2  -3   6  428.79   25.26  -2
  -3   2  -6  428.79   25.26   1
   2  -3   5  189.44   23.21  -2
  -3   2  -5  189.44   23.21   1
  -3   1   5  159.66   19.61  -2
   1  -3  -5  159.66   19.61   1
   1   2   5  194.10   27.20  -2
   2   1  -5  194.10   27.20   1
   2  -3   5  143.52   19.72  -2
  -3   2  -5  143.52   19.72   1
   2  -3   4  519.42   42.03  -2
  -3   2  -4  519.42   42.03   1
   2  -3   4  538.83   37.94  -2
  -3   2  -4  538.83   37.94   1
   2  -3   4  463.99   32.66  -2
  -3   2  -4  463.99   32.66   1
   1   2   4  469.23   42.86  -2
   2   1  -4  469.23   42.86   1
   2   1  -4  470.54   42.62  -2
   1   2   4  470.54   42.62   1
   1   2   4  450.90   39.47  -2
   2   1  -4  450.90   39.47   1
   1  -3  -4  412.79   31.03  -2
  -3   1   4  412.79   31.03   1
  -3   1   4  438.69   40.30  -2
   1  -3  -4  438.69   40.30   1
  -3   1   4  416.77   34.02  -2
   1  -3  -4  416.77   34.02   1
  -3   1   4  458.56   35.09  -2
   1  -3  -4  458.56   35.09   1
  -3   1   4  499.22   40.69  -2
   1  -3  -4  499.22   40.69   1
   2   1  -3  127.83   20.67  -2
   1   2   3  127.83   20.67   1
   2  -3   3  133.98   19.35  -2
  -3   2  -3  133.98   19.35   1
  -3   1   3  158.47   20.34  -2
   1  -3  -3  158.47   20.34   1
   2   1  -2  177.54   21.37  -2
   1   2   2  177.54   21.37   1
  -3   1   2  173.65   15.30  -2
   1  -3  -2  173.65   15.30   1
   2  -3   2  161.06   15.52  -2
  -3   2  -2  161.06   15.52   1
   2  -3   2  198.55   20.90  -2
  -3   2  -2  198.55   20.90   1
   1   2   1  377.17   11.66  -2
   2   1  -1  377.17   11.66   1
   1   2   1  415.05   28.57  -2
   2   1  -1  415.05   28.57   1
   2  -3   1  450.93   26.55  -2
  -3   2  -1  450.93   26.55   1
  -3   1   1  533.02   32.22  -2
   1  -3  -1  533.02   32.22   1
   1  -3  -1  469.73   24.95  -2
  -3   1   1  469.73   24.95   1
   2   1  -1  477.27   25.67  -2
   1   2   1  477.27   25.67   1
  -3   1   0 4018.40   69.72  -2
   1  -3   0 4018.40   69.72   1
   1  -3   0 4148.37   70.03  -2
  -3   1   0 4148.37   70.03   1
   1   2   0 4078.92   82.53  -2
   2   1   0 4078.92   82.53   1
  -3   1   0 3909.24   49.16  -2
   1  -3   0 3909.24   49.16   1
   1   2  -1  765.13   37.07  -2
   2   1   1  765.13   37.07   1
  -3   2   1  733.28   38.22  -2
   2  -3  -1  733.28   38.22   1
   2  -3  -1  841.28   34.18  -2
  -3   2   1  841.28   34.18   1
  -3   1  -1  790.42   25.11  -2
   1  -3   1  790.42   25.11   1
  -3   2   2  315.27   31.59  -2
   2  -3  -2  315.27   31.59   1
   1  -3   2  347.59   29.10  -2
  -3   1  -2  347.59   29.10   1
  -3   1  -2  314.70   21.48  -2
   1  -3   2  314.70   21.48   1
   1  -3   2  344.48   26.41  -2
  -3   1  -2  344.48   26.41   1
   2  -3  -2  352.07   23.45  -2
  -3   2   2  352.07   23.45   1
   1  -3   3  416.69   31.62  -2
  -3   1  -3  416.69   31.62   1
  -3   2   3  397.22   30.47  -2
   2  -3  -3  397.22   30.47   1
   1  -3   3  360.89   32.49  -2
  -3   1  -3  360.89   32.49   1
   2  -3  -3  378.60   26.84  -2
  -3   2   3  378.60   26.84   1
  -3   2   3  389.01   32.93  -2
   2  -3  -3  389.01   32.93   1
   1   2  -3  399.51   35.11  -2
   2   1   3  399.51   35.11   1
  -3   2   4  457.84   36.48  -2
   2  -3  -4  457.84   36.48   1
   2   1   4  467.70   40.36  -2
   1   2  -4  467.70   40.36   1
  -3   2   4  442.94   40.78  -2
   2  -3  -4  442.94   40.78   1
  -3   2   4  393.24   37.58  -2
   2  -3  -4  393.24   37.58   1
   1  -3   4  398.06   37.74  -2
  -3   1  -4  398.06   37.74   1
   1  -3   4  371.66   31.20  -2
  -3   1  -4  371.66   31.20   1
   1  -3   4  425.44   35.40  -2
  -3   1  -4  425.44   35.40   1
  -3   2   4  398.78   34.07  -2
   2  -3  -4  398.78   34.07   1
   1  -3   5  101.00   16.78  -2
  -3   1  -5  101.00   16.78   1
  -3   2   5   99.99   16.63  -2
   2  -3  -5   99.99   16.63   1
   2   1   5   84.91   14.22  -2
   1   2  -5   84.91   14.22   1
   2   1   6  625.33   31.83  -2
   1   2  -6  625.33   31.83   1
   1  -3   6  654.80   31.69  -2
  -3   1  -6  654.80   31.69   1
   2   2   0   66.28   12.70  -2
   2   2   0   66.28   12.70   1
   2  -4   0   73.10   12.07  -2
  -4   2   0   73.10   12.07   1
  -4   2   0   59.80   11.28  -2
   2  -4   0   59.80   11.28   1
   2  -4  -1  502.32   31.53  -2
  -4   2   1  502.32   31.53   1
  -4   2   1  440.19   35.00  -2
   2  -4  -1  440.19   35.00   1
  -4   2  -1  434.55   26.02  -2
   2  -4   1  434.55   26.02   1
   2  -4   1  391.13   30.92  -2
  -4   2  -1  391.13   30.92   1
   2   2  -1  443.24   32.07  -2
   2   2   1  443.24   32.07   1
   2  -4   2  349.80   27.77  -2
  -4   2  -2  349.80   27.77   1
   2   2  -2  340.63   30.65  -2
   2   2   2  340.63   30.65   1
   2  -4   2  370.52   31.21  -2
  -4   2  -2  370.52   31.21   1
   2  -4  -2  315.07   26.55  -2
  -4   2   2  315.07   26.55   1
  -4   2  -2  413.46   30.15  -2
   2  -4   2  413.46   30.15   1
   2  -4  -2  385.51   27.07  -2
  -4   2   2  385.51   27.07   1
   2  -4   2  374.24   33.20  -2
  -4   2  -2  374.24   33.20   1
   2  -4  -2  368.39   28.11  -2
  -4   2   2  368.39   28.11   1
   2  -4   3  216.90   24.33  -2
  -4   2  -3  216.90   24.33   1
   2   2  -3  215.96   30.02  -2
   2   2   3  215.96   30.02   1
   2  -4  -3  185.17   19.75  -2
  -4   2   3  185.17   19.75   1
   2  -4  -3  171.09   21.12  -2
  -4   2   3  171.09   21.12   1
   2  -4   3  189.25   22.96  -2
  -4   2  -3  189.25   22.96   1
   2  -4  -3  212.12   24.85  -2
  -4   2   3  212.12   24.85   1
   2  -4   3  204.10   24.47  -2
  -4   2  -3  204.10   24.47   1
   2  -4   3  204.41   25.01  -2
  -4   2  -3  204.41   25.01   1
  -4   2   3  218.85   27.07  -2
   2  -4  -3  218.85   27.07   1
  -4   2   4  812.21   49.17  -2
   2  -4  -4  812.21   49.17   1
   2   2  -4  732.15   54.14  -2
   2   2   4  732.15   54.14   1
   2  -4   4  817.04   46.84  -2
  -4   2  -4  817.04   46.84   1
   2  -4   4  827.41   48.38  -2
  -4   2  -4  827.41   48.38   1
   2  -4   4  883.58   52.99  -2
  -4   2  -4  883.58   52.99   1
  -4   2   4  798.15   49.40  -2
   2  -4  -4  798.15   49.40   1
   2  -4  -4  782.49   49.53  -2
  -4   2   4  782.49   49.53   1
   2   2   4  762.97   52.82  -2
   2   2  -4  762.97   52.82   1
   2   2   5   49.54   10.08  -2
   2   2  -5   49.54   10.08   1
  -4   2   5   64.17   12.48  -2
   2  -4  -5   64.17   12.48   1
   2   2   5   66.31   14.03  -2
   2   2  -5   66.31   14.03   1
   2  -4  -5   57.75   12.34  -2
  -4   2   5   57.75   12.34   1
   2  -4   5   38.83   10.53  -2
  -4   2  -5   38.83   10.53   1
   2  -4   6  155.57   12.31  -2
  -4   2  -6  155.57   12.31   1
  -2  -1   6  398.16   24.43  -2
  -1  -2  -6  398.16   24.43   1
  -1  -2  -6  439.43   28.24  -2
  -2  -1   6  439.43   28.24   1
  -1   3   5  171.07   25.59  -2
   3  -1  -5  171.07   25.59   1
  -2  -1   5  149.39   22.25  -2
  -1  -2  -5  149.39   22.25   1
  -1   3   5  168.81   25.36  -2
   3  -1  -5  168.81   25.36   1
   3  -2   5  170.06   20.85  -2
  -2   3  -5  170.06   20.85   1
  -2  -1   5  140.90   17.13  -2
  -1  -2  -5  140.90   17.13   1
   3  -2   5  160.23   20.88  -2
  -2   3  -5  160.23   20.88   1
  -1   3   4  544.73   46.32  -2
   3  -1  -4  544.73   46.32   1
   3  -2   4  451.88   38.14  -2
  -2   3  -4  451.88   38.14   1
   3  -2   4  523.53   37.87  -2
  -2   3  -4  523.53   37.87   1
  -1   3   4  512.14   46.61  -2
   3  -1  -4  512.14   46.61   1
  -2  -1   4  469.43   38.48  -2
  -1  -2  -4  469.43   38.48   1
  -1   3   4  468.26   34.68  -2
   3  -1  -4  468.26   34.68   1
   3  -1  -3  129.60   21.34  -2
  -1   3   3  129.60   21.34   1
  -1   3   3  130.83   16.65  -2
   3  -1  -3  130.83   16.65   1
   3  -2   3  131.39   17.83  -2
  -2   3  -3  131.39   17.83   1
  -2  -1   3  140.84   19.03  -2
  -1  -2  -3  140.84   19.03   1
  -2  -1   2  186.54   15.43  -2
  -1  -2  -2  186.54   15.43   1
  -2  -1   2  209.03   22.26  -2
  -1  -2  -2  209.03   22.26   1
  -2  -1   2  196.86   20.83  -2
  -1  -2  -2  196.86   20.83   1
   3  -2   2  193.22   16.31  -2
  -2   3  -2  193.22   16.31   1
  -1   3   2  205.37   21.63  -2
   3  -1  -2  205.37   21.63   1
  -2  -1   1  478.71   25.75  -2
  -1  -2  -1  478.71   25.75   1
  -1   3   1  467.36   30.38  -2
   3  -1  -1  467.36   30.38   1
   3  -1  -1  517.65   31.18  -2
  -1   3   1  517.65   31.18   1
  -2   3  -1  496.09   26.33  -2
   3  -2   1  496.09   26.33   1
  -2  -1   1  492.01   27.29  -2
  -1  -2  -1  492.01   27.29   1
   3  -1   0 3876.06   72.86  -2
  -1   3   0 3876.06   72.86   1
  -2   3   0 4016.04   73.95  -2
   3  -2   0 4016.04   73.95   1
  -1   3   0 3918.51   79.90  -2
   3  -1   0 3918.51   79.90   1
  -2  -1  -1  777.86   34.23  -2
  -1  -2   1  777.86   34.23   1
   3  -1   1  652.70   17.95  -2
  -1   3  -1  652.70   17.95   1
   3  -2  -1  833.34   37.42  -2
  -2   3   1  833.34   37.42   1
  -2   3   1  815.41   37.92  -2
   3  -2  -1  815.41   37.92   1
  -1   3  -1  736.81   36.02  -2
   3  -1   1  736.81   36.02   1
   3  -1   1  734.29   22.20  -2
  -1   3  -1  734.29   22.20   1
  -1  -2   1  743.55   19.61  -2
  -2  -1  -1  743.55   19.61   1
  -1  -2   2  346.68   29.21  -2
  -2  -1  -2  346.68   29.21   1
  -2   3   2  355.67   30.80  -2
   3  -2  -2  355.67   30.80   1
  -1  -2   2  317.11   27.76  -2
  -2  -1  -2  317.11   27.76   1
   3  -2  -2  413.04   31.74  -2
  -2   3   2  413.04   31.74   1
   3  -2  -3  403.68   25.99  -2
  -2   3   3  403.68   25.99   1
  -1  -2   3  389.05   29.83  -2
  -2  -1  -3  389.05   29.83   1
   3  -1   3  379.89   31.11  -2
  -1   3  -3  379.89   31.11   1
  -2   3   3  325.37   27.07  -2
   3  -2  -3  325.37   27.07   1
  -2   3   4  392.61   40.60  -2
   3  -2  -4  392.61   40.60   1
   3  -1   4  414.35   34.71  -2
  -1   3  -4  414.35   34.71   1
  -2   3   4  445.18   34.24  -2
   3  -2  -4  445.18   34.24   1
   3  -1   4  381.79   35.74  -2
  -1   3  -4  381.79   35.74   1
  -2   3   4  462.44   40.52  -2
   3  -2  -4  462.44   40.52   1
   3  -1   5  102.30   16.18  -2
  -1   3  -5  102.30   16.18   1
  -2   3   5   94.68   16.26  -2
   3  -2  -5   94.68   16.26   1
  -1  -2   5   97.33   18.69  -2
  -2  -1  -5   97.33   18.69   1
  -1  -2   5   83.63   14.55  -2
  -2  -1  -5   83.63   14.55   1
   3  -1   6  563.06   23.03  -2
  -1   3  -6  563.06   23.03   1
   3  -1   6  613.89   30.05  -2
  -1   3  -6  613.89   30.05   1
  -2  -1  -6  597.77   29.23  -2
  -1  -2   6  597.77   29.23   1
  -1  -2   6  584.38   25.75  -2
  -2  -1  -6  584.38   25.75   1
   0  -3  -6   36.28    7.96  -2
  -3   0   6   36.28    7.96   1
   3  -3   6   16.96    5.97  -2
  -3   3  -6   16.96    5.97   1
   3  -3   5   18.91    7.24  -2
  -3   3  -5   18.91    7.24   1
   3  -3   5   13.68    5.90  -2
  -3   3  -5   13.68    5.90   1
   0   3   5   23.67   10.39  -2
   3   0  -5   23.67   10.39   1
   0   3   5   12.34    6.96  -2
   3   0  -5   12.34    6.96   1
  -3   0   5   12.19    5.91  -2
   0  -3  -5   12.19    5.91   1
   3  -3   5   22.66    8.12  -2
  -3   3  -5   22.66    8.12   1
   3  -3   5   14.88    6.90  -2
  -3   3  -5   14.88    6.90   1
   3  -3   4 2705.35   85.69  -2
  -3   3  -4 2705.35   85.69   1
   0   3   4 2554.91  100.99  -2
   3   0  -4 2554.91  100.99   1
   0   3   4 2758.82  105.99  -2
   3   0  -4 2758.82  105.99   1
  -3   0   4 2614.25   77.05  -2
   0  -3  -4 2614.25   77.05   1
   3   0  -4 2767.83  104.19  -2
   0   3   4 2767.83  104.19   1
   3  -3   4 2703.22   86.71  -2
  -3   3  -4 2703.22   86.71   1
   3  -3   3  204.75   22.46  -2
  -3   3  -3  204.75   22.46   1
   3   0  -3  203.74   27.41  -2
   0   3   3  203.74   27.41   1
   0   3   3  250.36   30.86  -2
   3   0  -3  250.36   30.86   1
   3  -3   3  234.92   23.40  -2
  -3   3  -3  234.92   23.40   1
   3  -3   3  243.75   23.15  -2
  -3   3  -3  243.75   23.15   1
   0   3   2  138.93   15.80  -2
   3   0  -2  138.93   15.80   1
  -3   0   2  158.05   19.47  -2
   0  -3  -2  158.05   19.47   1
  -3   0   2  153.83   16.47  -2
   0  -3  -2  153.83   16.47   1
  -3   0   1 1307.61   46.55  -2
   0  -3  -1 1307.61   46.55   1
   3   0  -1 1289.73   54.18  -2
   0   3   1 1289.73   54.18   1
   0   3   1 1271.85   55.97  -2
   3   0  -1 1271.85   55.97   1
  -3   0   1 1392.43   50.56  -2
   0  -3  -1 1392.43   50.56   1
   0   3   1 1225.49   38.02  -2
   3   0  -1 1225.49   38.02   1
   3   0  -1 1294.69   36.70  -2
   0   3   1 1294.69   36.70   1
  -3   3  -1 1282.26   36.44  -2
   3  -3   1 1282.26   36.44   1
  -3   0   0  281.71   14.69  -2
   0  -3   0  281.71   14.69   1
   0   3   0  329.93   25.94  -2
   3   0   0  329.93   25.94   1
   3  -3   0  290.27   15.12  -2
  -3   3   0  290.27   15.12   1
   0  -3   0  283.82   17.60  -2
  -3   0   0  283.82   17.60   1
  -3   0  -1  185.83   18.46  -2
   0  -3   1  185.83   18.46   1
  -3   3   1  198.17   20.91  -2
   3  -3  -1  198.17   20.91   1
   0  -3   1  178.85   13.65  -2
  -3   0  -1  178.85   13.65   1
   3  -3  -1  179.72   16.64  -2
  -3   3   1  179.72   16.64   1
   0   3  -1  163.01   19.22  -2
   3   0   1  163.01   19.22   1
   3  -3  -2 4057.21   83.13  -2
  -3   3   2 4057.21   83.13   1
  -3   0  -2 3985.53   83.96  -2
   0  -3   2 3985.53   83.96   1
   0  -3   2 4224.58  111.21  -2
  -3   0  -2 4224.58  111.21   1
   0  -3   3   55.92   11.86  -2
  -3   0  -3   55.92   11.86   1
  -3   3   3   66.15   16.13  -2
   3  -3  -3   66.15   16.13   1
  -3   3   3   38.61    9.66  -2
   3  -3  -3   38.61    9.66   1
   3  -3  -3   62.71   10.95  -2
  -3   3   3   62.71   10.95   1
   0  -3   3   47.46   13.23  -2
  -3   0  -3   47.46   13.23   1
   0   3  -3   57.28   12.34  -2
   3   0   3   57.28   12.34   1
   0  -3   4  339.49   35.56  -2
  -3   0  -4  339.49   35.56   1
  -3   3   4  391.62   40.11  -2
   3  -3  -4  391.62   40.11   1
   3   0   4  329.61   34.76  -2
   0   3  -4  329.61   34.76   1
  -3   3   4  362.65   32.35  -2
   3  -3  -4  362.65   32.35   1
   0  -3   4  350.90   31.50  -2
  -3   0  -4  350.90   31.50   1
   3   0   5  134.43   18.37  -2
   0   3  -5  134.43   18.37   1
   0  -3   5  118.06   17.30  -2
  -3   0  -5  118.06   17.30   1
  -3   3   5  149.77   23.07  -2
   3  -3  -5  149.77   23.07   1
   0  -3   6   28.96    6.11  -2
  -3   0  -6   28.96    6.11   1
   3   0   6   34.89    7.14  -2
   0   3  -6   34.89    7.14   1
   1  -4  -6   62.54    7.83  -2
  -4   1   6   62.54    7.83   1
   1  -4  -5  113.81   17.65  -2
  -4   1   5  113.81   17.65   1
   1   3   5  103.54   18.24  -2
   3   1  -5  103.54   18.24   1
   3  -4   5   93.11   14.54  -2
  -4   3  -5   93.11   14.54   1
   3  -4   5   84.92   15.75  -2
  -4   3  -5   84.92   15.75   1
   3  -4   5  112.58   15.83  -2
  -4   3  -5  112.58   15.83   1
   1  -4  -4  161.65   23.92  -2
  -4   1   4  161.65   23.92   1
   3   1  -4  122.58   23.16  -2
   1   3   4  122.58   23.16   1
   3  -4   4  184.12   23.01  -2
  -4   3  -4  184.12   23.01   1
   1   3   4  166.00   26.48  -2
   3   1  -4  166.00   26.48   1
   3  -4   4  149.51   21.10  -2
  -4   3  -4  149.51   21.10   1
   1   3   4  127.06   21.52  -2
   3   1  -4  127.06   21.52   1
  -4   1   4  185.48   25.57  -2
   1  -4  -4  185.48   25.57   1
  -4   1   4  144.40   20.35  -2
   1  -4  -4  144.40   20.35   1
   1  -4  -4  154.03   20.72  -2
  -4   1   4  154.03   20.72   1
   1   3   3  531.56   45.60  -2
   3   1  -3  531.56   45.60   1
   1  -4  -3  510.49   40.07  -2
  -4   1   3  510.49   40.07   1
   3  -4   3  495.12   36.38  -2
  -4   3  -3  495.12   36.38   1
   3  -4   3  498.16   37.03  -2
  -4   3  -3  498.16   37.03   1
   3  -4   3  522.49   36.77  -2
  -4   3  -3  522.49   36.77   1
   3   1  -3  536.61   47.07  -2
   1   3   3  536.61   47.07   1
   3  -4   3  549.93   38.95  -2
  -4   3  -3  549.93   38.95   1
   1  -4  -3  536.80   36.81  -2
  -4   1   3  536.80   36.81   1
   3  -4   2 2475.95   78.07  -2
  -4   3  -2 2475.95   78.07   1
   3   1  -2 2486.98   93.56  -2
   1   3   2 2486.98   93.56   1
   3   1  -2 2152.30   67.98  -2
   1   3   2 2152.30   67.98   1
   1  -4  -2 2262.38   75.64  -2
  -4   1   2 2262.38   75.64   1
   1  -4  -2 2488.50   73.01  -2
  -4   1   2 2488.50   73.01   1
   3   1  -1  115.09   14.73  -2
   1   3   1  115.09   14.73   1
   3  -4   1   91.94   13.66  -2
  -4   3  -1   91.94   13.66   1
   3   1   0  524.73   30.22  -2
   1   3   0  524.73   30.22   1
   1   3   0  540.34   37.68  -2
   3   1   0  540.34   37.68   1
  -4   3   0  488.08   32.85  -2
   3  -4   0  488.08   32.85   1
   1  -4   0  590.94   31.71  -2
  -4   1   0  590.94   31.71   1
  -4   3   1  525.52   38.17  -2
   3  -4  -1  525.52   38.17   1
   1   3  -1  615.40   41.63  -2
   3   1   1  615.40   41.63   1
  -4   1  -1  599.56   38.30  -2
   1  -4   1  599.56   38.30   1
   1  -4   1  569.66   30.46  -2
  -4   1  -1  569.66   30.46   1
   3  -4  -1  580.90   35.89  -2
  -4   3   1  580.90   35.89   1
   1  -4   2  224.72   28.23  -2
  -4   1  -2  224.72   28.23   1
   3  -4  -2  223.55   23.43  -2
  -4   3   2  223.55   23.43   1
   1  -4   2  224.89   25.79  -2
  -4   1  -2  224.89   25.79   1
  -4   3   2  188.36   28.56  -2
   3  -4  -2  188.36   28.56   1
  -4   1  -2  218.81   22.58  -2
   1  -4   2  218.81   22.58   1
   3  -4  -2  232.90   21.68  -2
  -4   3   2  232.90   21.68   1
   1   3  -2  210.17   27.68  -2
   3   1   2  210.17   27.68   1
   1  -4   2  224.71   25.09  -2
  -4   1  -2  224.71   25.09   1
   3  -4  -2  198.30   19.87  -2
  -4   3   2  198.30   19.87   1
   1  -4   3  357.79   35.73  -2
  -4   1  -3  357.79   35.73   1
   1  -4   3  401.06   32.44  -2
  -4   1  -3  401.06   32.44   1
   3  -4  -3  451.17   33.02  -2
  -4   3   3  451.17   33.02   1
   3   1   3  373.28   32.55  -2
   1   3  -3  373.28   32.55   1
  -4   3   3  435.21   39.62  -2
   3  -4  -3  435.21   39.62   1
   1   3  -3  390.28   39.26  -2
   3   1   3  390.28   39.26   1
  -4   3   3  426.50   33.20  -2
   3  -4  -3  426.50   33.20   1
   1  -4   3  444.34   37.17  -2
  -4   1  -3  444.34   37.17   1
   3  -4  -3  478.58   31.37  -2
  -4   3   3  478.58   31.37   1
   1  -4   3  435.43   34.81  -2
  -4   1  -3  435.43   34.81   1
   3  -4  -3  416.70   32.93  -2
  -4   3   3  416.70   32.93   1
   3  -4  -4 1243.05   56.96  -2
  -4   3   4 1243.05   56.96   1
   1  -4   4 1132.44   57.70  -2
  -4   1  -4 1132.44   57.70   1
   3   1   4 1246.51   61.08  -2
   1   3  -4 1246.51   61.08   1
   1  -4   4 1278.49   59.16  -2
  -4   1  -4 1278.49   59.16   1
   1  -4   4 1293.25   64.97  -2
  -4   1  -4 1293.25   64.97   1
   1  -4   4 1213.13   53.25  -2
  -4   1  -4 1213.13   53.25   1
  -4   3   4 1185.81   55.44  -2
   3  -4  -4 1185.81   55.44   1
  -4   3   4 1303.52   69.75  -2
   3  -4  -4 1303.52   69.75   1
   3   1   5   77.75   13.11  -2
   1   3  -5   77.75   13.11   1
   1  -4   5   89.01   14.74  -2
  -4   1  -5   89.01   14.74   1
   1  -4   5   69.09   11.37  -2
  -4   1  -5   69.09   11.37   1
   1  -4   5   66.99   13.32  -2
  -4   1  -5   66.99   13.32   1
   1  -4   6  221.25   14.15  -2
  -4   1  -6  221.25   14.15   1
   3   1   6  165.50   12.24  -2
   1   3  -6  165.50   12.24   1
   2   3   5   35.18    6.40  -2
   3   2  -5   35.18    6.40   1
   3  -5   5   62.46   11.90  -2
  -5   3  -5   62.46   11.90   1
   3  -5   4  232.00   25.26  -2
  -5   3  -4  232.00   25.26   1
   3  -5   4  259.80   27.80  -2
  -5   3  -4  259.80   27.80   1
   2   3   4  265.41   29.99  -2
   3   2  -4  265.41   29.99   1
  -5   2   4  276.60   27.96  -2
   2  -5  -4  276.60   27.96   1
   2  -5  -4  245.62   26.84  -2
  -5   2   4  245.62   26.84   1
  -5   2   4  257.75   27.90  -2
   2  -5  -4  257.75   27.90   1
   3  -5   4  254.20   26.31  -2
  -5   3  -4  254.20   26.31   1
   3   2  -3  103.63   22.89  -2
   2   3   3  103.63   22.89   1
   3  -5   3   81.75   18.63  -2
  -5   3  -3   81.75   18.63   1
   2  -5  -3   95.06   17.67  -2
  -5   2   3   95.06   17.67   1
   2   3   3   77.84   17.95  -2
   3   2  -3   77.84   17.95   1
   3  -5   3   97.72   17.52  -2
  -5   3  -3   97.72   17.52   1
   3  -5   3   91.70   16.82  -2
  -5   3  -3   91.70   16.82   1
   3   2  -3   88.43   17.78  -2
   2   3   3   88.43   17.78   1
   2  -5  -3  111.65   18.75  -2
  -5   2   3  111.65   18.75   1
   3  -5   2  640.65   46.04  -2
  -5   3  -2  640.65   46.04   1
   3  -5   2  635.98   43.97  -2
  -5   3  -2  635.98   43.97   1
   2  -5  -2  711.19   44.30  -2
  -5   2   2  711.19   44.30   1
   3   2  -2  698.12   45.25  -2
   2   3   2  698.12   45.25   1
   3   2  -2  715.77   56.77  -2
   2   3   2  715.77   56.77   1
   3  -5   2  688.87   46.77  -2
  -5   3  -2  688.87   46.77   1
   2  -5  -2  712.46   40.11  -2
  -5   2   2  712.46   40.11   1
   3  -5   2  727.49   43.15  -2
  -5   3  -2  727.49   43.15   1
  -5   3  -2  689.94   42.90  -2
   3  -5   2  689.94   42.90   1
   2  -5  -2  684.00   42.37  -2
  -5   2   2  684.00   42.37   1
   2   3   2  734.03   50.88  -2
   3   2  -2  734.03   50.88   1
   2  -5  -2  692.73   44.52  -2
  -5   2   2  692.73   44.52   1
   3  -5   2  739.18   45.16  -2
  -5   3  -2  739.18   45.16   1
   3  -5   1  532.11   34.65  -2
  -5   3  -1  532.11   34.65   1
   3  -5   1  495.97   34.55  -2
  -5   3  -1  495.97   34.55   1
   3  -5   1  507.99   36.30  -2
  -5   3  -1  507.99   36.30   1
   3  -5   1  478.26   37.04  -2
  -5   3  -1  478.26   37.04   1
   2  -5  -1  481.68   34.48  -2
  -5   2   1  481.68   34.48   1
   3   2  -1  559.67   38.70  -2
   2   3   1  559.67   38.70   1
   2  -5  -1  458.21   32.47  -2
  -5   2   1  458.21   32.47   1
   2  -5  -1  490.50   34.31  -2
  -5   2   1  490.50   34.31   1
   3  -5   0  360.57   27.58  -2
  -5   3   0  360.57   27.58   1
   3   2   0  281.31   27.80  -2
   2   3   0  281.31   27.80   1
   2  -5   0  379.51   29.35  -2
  -5   2   0  379.51   29.35   1
   3  -5   0  337.70   28.43  -2
  -5   3   0  337.70   28.43   1
   2   3   0  357.78   34.05  -2
   3   2   0  357.78   34.05   1
  -5   3   0  371.38   33.31  -2
   3  -5   0  371.38   33.31   1
   2  -5   0  368.33   29.56  -2
  -5   2   0  368.33   29.56   1
   2  -5   0  372.43   31.01  -2
  -5   2   0  372.43   31.01   1
   3   2   0  361.62   27.21  -2
   2   3   0  361.62   27.21   1
   2  -5   1   92.74   18.24  -2
  -5   2  -1   92.74   18.24   1
   3  -5  -1   90.56   15.05  -2
  -5   3   1   90.56   15.05   1
   2  -5   1   76.93   13.30  -2
  -5   2  -1   76.93   13.30   1
   2  -5   1   80.95   13.43  -2
  -5   2  -1   80.95   13.43   1
   2   3  -1  120.63   20.26  -2
   3   2   1  120.63   20.26   1
   3  -5  -1   81.62   14.55  -2
  -5   3   1   81.62   14.55   1
   3  -5  -1  100.47   17.57  -2
  -5   3   1  100.47   17.57   1
  -5   3   1  103.27   19.99  -2
   3  -5  -1  103.27   19.99   1
   3  -5  -1  123.11   18.76  -2
  -5   3   1  123.11   18.76   1
   2  -5   2  152.33   24.58  -2
  -5   2  -2  152.33   24.58   1
   3  -5  -2  184.49   22.01  -2
  -5   3   2  184.49   22.01   1
   2  -5   2  199.70   26.36  -2
  -5   2  -2  199.70   26.36   1
   2  -5   2  156.94   20.45  -2
  -5   2  -2  156.94   20.45   1
   2  -5   2  166.13   21.88  -2
  -5   2  -2  166.13   21.88   1
   2  -5   2  160.19   20.92  -2
  -5   2  -2  160.19   20.92   1
   3   2   2  190.20   24.41  -2
   2   3  -2  190.20   24.41   1
   3  -5  -2  176.99   22.66  -2
  -5   3   2  176.99   22.66   1
  -5   2  -2  195.05   24.10  -2
   2  -5   2  195.05   24.10   1
   3  -5  -2  174.13   20.43  -2
  -5   3   2  174.13   20.43   1
   2  -5   2  182.49   25.16  -2
  -5   2  -2  182.49   25.16   1
   2   3  -2  184.72   26.90  -2
   3   2   2  184.72   26.90   1
   3  -5  -2  181.04   23.84  -2
  -5   3   2  181.04   23.84   1
   2   3  -3  101.30   22.69  -2
   3   2   3  101.30   22.69   1
   2  -5   3   71.62   16.50  -2
  -5   2  -3   71.62   16.50   1
  -5   3   3   83.34   15.52  -2
   3  -5  -3   83.34   15.52   1
   2  -5   3   96.65   17.02  -2
  -5   2  -3   96.65   17.02   1
   3  -5  -3   62.04   14.48  -2
  -5   3   3   62.04   14.48   1
   2  -5   3   76.74   13.81  -2
  -5   2  -3   76.74   13.81   1
   3  -5  -3   83.33   14.57  -2
  -5   3   3   83.33   14.57   1
   2  -5   3   68.82   15.14  -2
  -5   2  -3   68.82   15.14   1
   3  -5  -3   86.45   15.23  -2
  -5   3   3   86.45   15.23   1
   2   3  -3   87.85   19.49  -2
   3   2   3   87.85   19.49   1
   2  -5   4  596.27   38.00  -2
  -5   2  -4  596.27   38.00   1
   2  -5   4  675.68   40.85  -2
  -5   2  -4  675.68   40.85   1
   2  -5   4  631.69   41.21  -2
  -5   2  -4  631.69   41.21   1
  -5   3   4  540.15   36.40  -2
   3  -5  -4  540.15   36.40   1
   2  -5   4  600.54   40.61  -2
  -5   2  -4  600.54   40.61   1
   3   2   5   68.21   10.27  -2
   2   3  -5   68.21   10.27   1
   2  -5   5  100.11   13.29  -2
  -5   2  -5  100.11   13.29   1
  -5   3   5   92.65   12.48  -2
   3  -5  -5   92.65   12.48   1
   3  -6   0 1290.24   56.02  -2
  -6   3   0 1290.24   56.02   1
   3  -6   0 1284.51   61.50  -2
  -6   3   0 1284.51   61.50   1
   3  -6   0 1301.01   66.21  -2
  -6   3   0 1301.01   66.21   1
  -6   3  -1  107.49   19.37  -2
   3  -6   1  107.49   19.37   1
   3  -6  -1  117.68   18.19  -2
  -6   3   1  117.68   18.19   1
   3  -6   1   94.63   15.23  -2
  -6   3  -1   94.63   15.23   1
   3  -6  -1  111.64   19.19  -2
  -6   3   1  111.64   19.19   1
   3  -6   1  105.18   19.48  -2
  -6   3  -1  105.18   19.48   1
   3   3  -1   81.40   17.18  -2
   3   3   1   81.40   17.18   1
   3   3   1   99.91   18.57  -2
   3   3  -1   99.91   18.57   1
   3  -6   1  119.19   20.69  -2
  -6   3  -1  119.19   20.69   1
   3   3   1  112.66   16.81  -2
   3   3  -1  112.66   16.81   1
   3   3  -2   67.50   19.14  -2
   3   3   2   67.50   19.14   1
   3  -6   2   53.03   12.47  -2
  -6   3  -2   53.03   12.47   1
   3  -6   2   70.35   14.35  -2
  -6   3  -2   70.35   14.35   1
   3  -6   2   87.77   17.56  -2
  -6   3  -2   87.77   17.56   1
   3  -6   2   60.74   13.60  -2
  -6   3  -2   60.74   13.60   1
   3   3   2   77.96   16.17  -2
   3   3  -2   77.96   16.17   1
   3  -6  -2   60.72   13.02  -2
  -6   3   2   60.72   13.02   1
   3  -6  -2   47.78   12.18  -2
  -6   3   2   47.78   12.18   1
   3  -6  -2   58.29   14.19  -2
  -6   3   2   58.29   14.19   1
   3  -6   3  330.03   29.89  -2
  -6   3  -3  330.03   29.89   1
   3  -6   3  312.02   28.54  -2
  -6   3  -3  312.02   28.54   1
   3  -6   3  268.70   25.75  -2
  -6   3  -3  268.70   25.75   1
   3  -6  -3  259.77   23.25  -2
  -6   3   3  259.77   23.25   1
  -6   3   3  223.85   24.54  -2
   3  -6  -3  223.85   24.54   1
   3  -6   4   84.24   13.40  -2
  -6   3  -4   84.24   13.40   1
  -6   3   4   87.52   12.97  -2
   3  -6  -4   87.52   12.97   1
  -6   3   4   94.63   14.49  -2
   3  -6  -4   94.63   14.49   1
   4  -2   0   49.81    8.88  -2
  -2   4   0   49.81    8.88   1
  -2   4   0   71.39   12.83  -2
   4  -2   0   71.39   12.83   1
  -2  -2   1  482.40   31.06  -2
  -2  -2  -1  482.40   31.06   1
  -2   4  -1  438.61   31.36  -2
   4  -2   1  438.61   31.36   1
   4  -2  -1  487.29   32.92  -2
  -2   4   1  487.29   32.92   1
  -2   4   1  454.91   32.25  -2
   4  -2  -1  454.91   32.25   1
  -2  -2   1  450.13   33.30  -2
  -2  -2  -1  450.13   33.30   1
  -2  -2   2  346.43   32.04  -2
  -2  -2  -2  346.43   32.04   1
  -2  -2   2  341.40   33.50  -2
  -2  -2  -2  341.40   33.50   1
  -2  -2  -2  358.31   29.31  -2
  -2  -2   2  358.31   29.31   1
  -2   4   2  309.51   31.34  -2
   4  -2  -2  309.51   31.34   1
   4  -2  -2  338.69   25.51  -2
  -2   4   2  338.69   25.51   1
  -2   4  -2  397.10   34.21  -2
   4  -2   2  397.10   34.21   1
   4  -2  -2  315.93   31.13  -2
  -2   4   2  315.93   31.13   1
   4  -2  -2  330.30   24.23  -2
  -2   4   2  330.30   24.23   1
  -2   4   3  191.12   21.53  -2
   4  -2  -3  191.12   21.53   1
  -2  -2   3  182.80   27.64  -2
  -2  -2  -3  182.80   27.64   1
  -2  -2   3  208.36   23.18  -2
  -2  -2  -3  208.36   23.18   1
  -2  -2  -3  219.18   25.71  -2
  -2  -2   3  219.18   25.71   1
   4  -2  -3  197.18   20.10  -2
  -2   4   3  197.18   20.10   1
  -2   4   4  816.22   59.55  -2
   4  -2  -4  816.22   59.55   1
   4  -2   4  803.50   47.87  -2
  -2   4  -4  803.50   47.87   1
  -2  -2   4  819.95   47.29  -2
  -2  -2  -4  819.95   47.29   1
  -2   4   4  748.35   54.12  -2
   4  -2  -4  748.35   54.12   1
  -2  -2  -4  770.16   49.02  -2
  -2  -2   4  770.16   49.02   1
  -2   4   4  845.57   46.54  -2
   4  -2  -4  845.57   46.54   1
   4  -2   4  724.45   42.87  -2
  -2   4  -4  724.45   42.87   1
   4  -2   5   64.42   12.34  -2
  -2   4  -5   64.42   12.34   1
  -2  -2   5   66.85   14.67  -2
  -2  -2  -5   66.85   14.67   1
  -2   4   5   44.42   11.76  -2
   4  -2  -5   44.42   11.76   1
   4  -2   5   65.24   12.10  -2
  -2   4  -5   65.24   12.10   1
  -2  -2  -5   70.45   13.53  -2
  -2  -2   5   70.45   13.53   1
   4  -3   6   47.68    7.53  -2
  -3   4  -6   47.68    7.53   1
  -1  -3  -6   81.15    9.09  -2
  -3  -1   6   81.15    9.09   1
  -1   4   5  113.73   19.62  -2
   4  -1  -5  113.73   19.62   1
   4  -3   5  111.98   15.95  -2
  -3   4  -5  111.98   15.95   1
  -1   4   5  105.69   18.71  -2
   4  -1  -5  105.69   18.71   1
  -1  -3  -5  119.56   18.39  -2
  -3  -1   5  119.56   18.39   1
  -3  -1   5   86.52   15.74  -2
  -1  -3  -5   86.52   15.74   1
   4  -3   5  100.26   14.40  -2
  -3   4  -5  100.26   14.40   1
   4  -3   4  184.35   23.29  -2
  -3   4  -4  184.35   23.29   1
  -1   4   4  148.43   25.92  -2
   4  -1  -4  148.43   25.92   1
   4  -3   4  111.78   15.70  -2
  -3   4  -4  111.78   15.70   1
  -1   4   4  141.76   24.87  -2
   4  -1  -4  141.76   24.87   1
   4  -3   4  153.86   19.81  -2
  -3   4  -4  153.86   19.81   1
  -1  -3  -4  171.50   24.55  -2
  -3  -1   4  171.50   24.55   1
   4  -3   4  161.12   20.18  -2
  -3   4  -4  161.12   20.18   1
  -3  -1   4  154.99   22.79  -2
  -1  -3  -4  154.99   22.79   1
  -1   4   3  486.44   44.20  -2
   4  -1  -3  486.44   44.20   1
   4  -3   3  487.17   34.97  -2
  -3   4  -3  487.17   34.97   1
  -1  -3  -3  505.84   41.04  -2
  -3  -1   3  505.84   41.04   1
   4  -3   3  502.24   33.69  -2
  -3   4  -3  502.24   33.69   1
  -1   4   3  577.70   35.55  -2
   4  -1  -3  577.70   35.55   1
   4  -1  -3  495.54   30.84  -2
  -1   4   3  495.54   30.84   1
  -3  -1   2 2201.11   65.60  -2
  -1  -3  -2 2201.11   65.60   1
  -3  -1   2 2508.36   86.85  -2
  -1  -3  -2 2508.36   86.85   1
  -1   4   2 2402.54   78.55  -2
   4  -1  -2 2402.54   78.55   1
  -1  -3  -2 2345.51   77.98  -2
  -3  -1   2 2345.51   77.98   1
   4  -1  -2 2625.62   93.26  -2
  -1   4   2 2625.62   93.26   1
  -3   4  -2 2429.26   75.20  -2
   4  -3   2 2429.26   75.20   1
   4  -1  -2 2746.20   76.93  -2
  -1   4   2 2746.20   76.93   1
   4  -1  -2 2291.53   63.21  -2
  -1   4   2 2291.53   63.21   1
  -3  -1   1  104.74   15.36  -2
  -1  -3  -1  104.74   15.36   1
  -3   4  -1  111.95   14.59  -2
   4  -3   1  111.95   14.59   1
   4  -1  -1  104.80   17.25  -2
  -1   4   1  104.80   17.25   1
  -1   4   1  111.67   15.02  -2
   4  -1  -1  111.67   15.02   1
  -3  -1   1  112.20   14.99  -2
  -1  -3  -1  112.20   14.99   1
   4  -1   0  565.37   33.18  -2
  -1   4   0  565.37   33.18   1
  -1   4   0  539.84   37.60  -2
   4  -1   0  539.84   37.60   1
  -3   4   0  529.93   30.47  -2
   4  -3   0  529.93   30.47   1
  -3  -1  -1  554.43   35.92  -2
  -1  -3   1  554.43   35.92   1
  -1   4  -1  516.70   37.51  -2
   4  -1   1  516.70   37.51   1
  -1  -3   1  544.58   22.67  -2
  -3  -1  -1  544.58   22.67   1
  -3  -1  -2  282.24   26.61  -2
  -1  -3   2  282.24   26.61   1
  -1  -3   2  220.16   23.07  -2
  -3  -1  -2  220.16   23.07   1
   4  -3  -2  221.39   21.31  -2
  -3   4   2  221.39   21.31   1
  -1   4  -2  212.74   27.52  -2
   4  -1   2  212.74   27.52   1
  -3   4   2  197.40   27.20  -2
   4  -3  -2  197.40   27.20   1
  -1  -3   2  216.11   27.56  -2
  -3  -1  -2  216.11   27.56   1
  -3   4   3  427.47   46.64  -2
   4  -3  -3  427.47   46.64   1
  -3   4   3  443.55   41.91  -2
   4  -3  -3  443.55   41.91   1
  -1  -3   3  449.63   42.83  -2
  -3  -1  -3  449.63   42.83   1
  -1  -3   3  436.87   32.96  -2
  -3  -1  -3  436.87   32.96   1
  -3   4   3  468.88   35.49  -2
   4  -3  -3  468.88   35.49   1
  -3  -1  -3  383.26   32.08  -2
  -1  -3   3  383.26   32.08   1
  -3   4   4 1327.35   74.11  -2
   4  -3  -4 1327.35   74.11   1
   4  -1   4 1203.92   60.26  -2
  -1   4  -4 1203.92   60.26   1
  -3   4   4 1238.91   61.52  -2
   4  -3  -4 1238.91   61.52   1
  -3   4   4 1258.06   58.20  -2
   4  -3  -4 1258.06   58.20   1
  -1  -3   4 1205.13   65.72  -2
  -3  -1  -4 1205.13   65.72   1
  -3  -1  -4 1221.15   55.78  -2
  -1  -3   4 1221.15   55.78   1
   4  -3  -4 1204.11   46.93  -2
  -3   4   4 1204.11   46.93   1
   4  -1   4 1224.23   50.28  -2
  -1   4  -4 1224.23   50.28   1
  -1  -3   4 1264.12   56.54  -2
  -3  -1  -4 1264.12   56.54   1
   4  -1   5   69.14   12.58  -2
  -1   4  -5   69.14   12.58   1
  -3   4   5   60.40   14.49  -2
   4  -3  -5   60.40   14.49   1
  -3  -1  -5   60.55   10.50  -2
  -1  -3   5   60.55   10.50   1
   4  -1   5   57.19   11.19  -2
  -1   4  -5   57.19   11.19   1
  -3   4   5   59.16   11.76  -2
   4  -3  -5   59.16   11.76   1
  -1  -3   5   72.13   11.87  -2
  -3  -1  -5   72.13   11.87   1
  -1  -3   6  183.66   12.48  -2
  -3  -1  -6  183.66   12.48   1
   0   4   5   32.27    9.31  -2
   4   0  -5   32.27    9.31   1
   4  -4   5   12.37   10.26  -2
  -4   4  -5   12.37   10.26   1
   0   4   5   17.64    7.50  -2
   4   0  -5   17.64    7.50   1
  -4   0   5   27.78    7.46  -2
   0  -4  -5   27.78    7.46   1
   0  -4  -5   32.25    9.46  -2
  -4   0   5   32.25    9.46   1
   4  -4   4  221.55   25.11  -2
  -4   4  -4  221.55   25.11   1
   0   4   4  183.98   27.12  -2
   4   0  -4  183.98   27.12   1
   0   4   4  263.49   32.15  -2
   4   0  -4  263.49   32.15   1
   4  -4   4  202.52   23.31  -2
  -4   4  -4  202.52   23.31   1
   0  -4  -4  209.37   27.34  -2
  -4   0   4  209.37   27.34   1
   4  -4   4  181.42   20.84  -2
  -4   4  -4  181.42   20.84   1
   4   0  -3  106.63   21.80  -2
   0   4   3  106.63   21.80   1
   4  -4   3  111.73   18.01  -2
  -4   4  -3  111.73   18.01   1
   0   4   3  110.70   22.06  -2
   4   0  -3  110.70   22.06   1
   0  -4  -3  117.81   20.25  -2
  -4   0   3  117.81   20.25   1
   4  -4   3  100.26   15.59  -2
  -4   4  -3  100.26   15.59   1
   4  -4   2  208.56   22.77  -2
  -4   4  -2  208.56   22.77   1
   4  -4   2  201.90   23.29  -2
  -4   4  -2  201.90   23.29   1
   0  -4  -2  210.20   24.95  -2
  -4   0   2  210.20   24.95   1
  -4   0   2  208.27   22.89  -2
   0  -4  -2  208.27   22.89   1
   0   4   2  214.60   28.61  -2
   4   0  -2  214.60   28.61   1
   4  -4   2  171.70   20.13  -2
  -4   4  -2  171.70   20.13   1
   4   0  -2  231.66   30.41  -2
   0   4   2  231.66   30.41   1
   4   0  -2  262.22   25.08  -2
   0   4   2  262.22   25.08   1
  -4   0   1  498.36   32.60  -2
   0  -4  -1  498.36   32.60   1
  -4   0   1  509.08   36.45  -2
   0  -4  -1  509.08   36.45   1
   4   0  -1  495.37   40.49  -2
   0   4   1  495.37   40.49   1
   0  -4  -1  530.06   36.48  -2
  -4   0   1  530.06   36.48   1
   4  -4   1  494.56   29.85  -2
  -4   4  -1  494.56   29.85   1
   4  -4   1  516.34   28.93  -2
  -4   4  -1  516.34   28.93   1
   4   0  -1  457.51   31.08  -2
   0   4   1  457.51   31.08   1
   0  -4  -1  552.61   32.91  -2
  -4   0   1  552.61   32.91   1
   0   4   0 2109.90   80.85  -2
   4   0   0 2109.90   80.85   1
   4  -4   0 2290.88   65.04  -2
  -4   4   0 2290.88   65.04   1
   4   0   0 2328.66   68.63  -2
   0   4   0 2328.66   68.63   1
   4  -4   0 2241.33   61.84  -2
  -4   4   0 2241.33   61.84   1
   4   0   0 2255.80   76.65  -2
   0   4   0 2255.80   76.65   1
   0  -4   0 2248.36   61.38  -2
  -4   0   0 2248.36   61.38   1
  -4   4   1  456.85   39.66  -2
   4  -4  -1  456.85   39.66   1
  -4   0  -1  466.81   35.74  -2
   0  -4   1  466.81   35.74   1
   0  -4   1  477.50   33.51  -2
  -4   0  -1  477.50   33.51   1
   0   4  -1  498.83   41.40  -2
   4   0   1  498.83   41.40   1
   0  -4   1  450.69   26.18  -2
  -4   0  -1  450.69   26.18   1
   4  -4  -1  477.96   29.95  -2
  -4   4   1  477.96   29.95   1
   4   0   1  417.13   30.74  -2
   0   4  -1  417.13   30.74   1
   0  -4   2  102.60   20.93  -2
  -4   0  -2  102.60   20.93   1
  -4   0  -2  120.30   18.31  -2
   0  -4   2  120.30   18.31   1
   4  -4  -2  114.82   16.33  -2
  -4   4   2  114.82   16.33   1
  -4   4   2  104.77   22.46  -2
   4  -4  -2  104.77   22.46   1
   0  -4   2  110.13   18.02  -2
  -4   0  -2  110.13   18.02   1
   0   4  -2   99.54   21.07  -2
   4   0   2   99.54   21.07   1
   4  -4  -2  108.24   15.41  -2
  -4   4   2  108.24   15.41   1
   4  -4  -3  331.05   25.99  -2
  -4   4   3  331.05   25.99   1
  -4   4   3  349.02   37.02  -2
   4  -4  -3  349.02   37.02   1
   0  -4   3  246.70   32.80  -2
  -4   0  -3  246.70   32.80   1
  -4   4   3  374.06   32.96  -2
   4  -4  -3  374.06   32.96   1
   0  -4   3  329.87   30.81  -2
  -4   0  -3  329.87   30.81   1
   4  -4  -3  314.37   26.97  -2
  -4   4   3  314.37   26.97   1
   0   4  -3  382.49   42.79  -2
   4   0   3  382.49   42.79   1
  -4   4   4   50.98   12.58  -2
   4  -4  -4   50.98   12.58   1
  -4   4   4   41.92   13.14  -2
   4  -4  -4   41.92   13.14   1
   0  -4   4   43.18   12.46  -2
  -4   0  -4   43.18   12.46   1
   0  -4   4   62.37   13.55  -2
  -4   0  -4   62.37   13.55   1
   4   0   5   15.25    5.83  -2
   0   4  -5   15.25    5.83   1
   0  -4   5   25.82    6.61  -2
  -4   0  -5   25.82    6.61   1
   0  -4   5   27.20    7.94  -2
  -4   0  -5   27.20    7.94   1
   4  -4  -5   22.24    5.61  -2
  -4   4   5   22.24    5.61   1
  -4   4   5   29.38    7.95  -2
   4  -4  -5   29.38    7.95   1
   4  -5   5   39.72    9.55  -2
  -5   4  -5   39.72    9.55   1
   1   4   5   61.33   11.18  -2
   4   1  -5   61.33   11.18   1
   4  -5   5   59.92    9.23  -2
  -5   4  -5   59.92    9.23   1
   1  -5  -5   67.97   10.92  -2
  -5   1   5   67.97   10.92   1
   1   4   4  229.91   26.89  -2
   4   1  -4  229.91   26.89   1
   4  -5   4  270.65   28.01  -2
  -5   4  -4  270.65   28.01   1
   1   4   4  204.35   26.66  -2
   4   1  -4  204.35   26.66   1
   4  -5   4  217.00   23.26  -2
  -5   4  -4  217.00   23.26   1
  -5   1   4  234.20   27.00  -2
   1  -5  -4  234.20   27.00   1
   1  -5  -4  231.42   26.11  -2
  -5   1   4  231.42   26.11   1
   4   1  -3   17.62    9.95  -2
   1   4   3   17.62    9.95   1
   1  -5  -3   26.40    9.83  -2
  -5   1   3   26.40    9.83   1
   4  -5   3    1.74   15.87  -2
  -5   4  -3    1.74   15.87   1
   4  -5   3   12.72    5.70  -2
  -5   4  -3   12.72    5.70   1
   1   4   3   33.31   12.75  -2
   4   1  -3   33.31   12.75   1
   1  -5  -3   33.23   10.49  -2
  -5   1   3   33.23   10.49   1
   4   1  -2  215.89   23.81  -2
   1   4   2  215.89   23.81   1
   4  -5   2  163.68   24.50  -2
  -5   4  -2  163.68   24.50   1
   1   4   2  192.87   27.75  -2
   4   1  -2  192.87   27.75   1
   4  -5   2  148.11   18.71  -2
  -5   4  -2  148.11   18.71   1
   4  -5   2  143.75   18.97  -2
  -5   4  -2  143.75   18.97   1
   1  -5  -2  161.21   22.98  -2
  -5   1   2  161.21   22.98   1
   4   1  -2  196.00   30.51  -2
   1   4   2  196.00   30.51   1
   4  -5   2  162.98   22.54  -2
  -5   4  -2  162.98   22.54   1
  -5   1   2  177.49   23.73  -2
   1  -5  -2  177.49   23.73   1
   4  -5   1   55.37   14.74  -2
  -5   4  -1   55.37   14.74   1
  -5   4  -1   89.03   17.70  -2
   4  -5   1   89.03   17.70   1
   4  -5   1   90.03   15.86  -2
  -5   4  -1   90.03   15.86   1
   1  -5  -1   68.00   12.47  -2
  -5   1   1   68.00   12.47   1
   4  -5   1   63.68   12.89  -2
  -5   4  -1   63.68   12.89   1
   4  -5   1   65.35   14.00  -2
  -5   4  -1   65.35   14.00   1
   4  -5   1   72.40   13.46  -2
  -5   4  -1   72.40   13.46   1
   1  -5  -1   69.68   14.98  -2
  -5   1   1   69.68   14.98   1
   4   1  -1   60.25   12.40  -2
   1   4   1   60.25   12.40   1
   1  -5  -1   63.91   13.36  -2
  -5   1   1   63.91   13.36   1
   4   1  -1   79.26   18.62  -2
   1   4   1   79.26   18.62   1
  -5   1   1   81.02   17.15  -2
   1  -5  -1   81.02   17.15   1
   4  -5   1   75.00   12.44  -2
  -5   4  -1   75.00   12.44   1
  -5   4   0  163.24   24.21  -2
   4  -5   0  163.24   24.21   1
   4  -5   0  147.27   20.44  -2
  -5   4   0  147.27   20.44   1
   4  -5   0  197.03   21.91  -2
  -5   4   0  197.03   21.91   1
  -5   1   0  159.25   23.25  -2
   1  -5   0  159.25   23.25   1
   4   1   0  179.49   20.96  -2
   1   4   0  179.49   20.96   1
   1  -5   0  191.81   21.73  -2
  -5   1   0  191.81   21.73   1
   4  -5   0  171.53   22.26  -2
  -5   4   0  171.53   22.26   1
   1   4   0  185.92   26.80  -2
   4   1   0  185.92   26.80   1
   1  -5   0  188.59   21.09  -2
  -5   1   0  188.59   21.09   1
   4  -5   0  163.53   19.48  -2
  -5   4   0  163.53   19.48   1
   4  -5  -1  354.75   29.27  -2
  -5   4   1  354.75   29.27   1
   4  -5  -1  320.31   30.20  -2
  -5   4   1  320.31   30.20   1
   4  -5  -1  307.45   30.05  -2
  -5   4   1  307.45   30.05   1
  -5   1  -1  391.69   35.73  -2
   1  -5   1  391.69   35.73   1
   1  -5   1  354.13   32.83  -2
  -5   1  -1  354.13   32.83   1
   1   4  -1  342.07   37.36  -2
   4   1   1  342.07   37.36   1
  -5   4   1  362.06   38.74  -2
   4  -5  -1  362.06   38.74   1
   4  -5  -1  392.68   31.40  -2
  -5   4   1  392.68   31.40   1
   4   1   1  357.75   30.11  -2
   1   4  -1  357.75   30.11   1
   1  -5   1  370.26   38.45  -2
  -5   1  -1  370.26   38.45   1
   4  -5  -1  347.39   28.96  -2
  -5   4   1  347.39   28.96   1
   1  -5   2  184.81   29.61  -2
  -5   1  -2  184.81   29.61   1
   4  -5  -2  278.15   26.46  -2
  -5   4   2  278.15   26.46   1
  -5   4   2  268.72   37.21  -2
   4  -5  -2  268.72   37.21   1
   1  -5   2  230.37   28.87  -2
  -5   1  -2  230.37   28.87   1
   1  -5   2  232.52   23.65  -2
  -5   1  -2  232.52   23.65   1
  -5   1  -2  210.40   25.73  -2
   1  -5   2  210.40   25.73   1
   4  -5  -2  225.26   26.63  -2
  -5   4   2  225.26   26.63   1
   1  -5   2  240.40   28.77  -2
  -5   1  -2  240.40   28.77   1
   4  -5  -2  218.59   24.19  -2
  -5   4   2  218.59   24.19   1
   1   4  -2  320.41   38.91  -2
   4   1   2  320.41   38.91   1
   4  -5  -2  233.56   24.52  -2
  -5   4   2  233.56   24.52   1
   1  -5   3   93.42   16.75  -2
  -5   1  -3   93.42   16.75   1
   1  -5   3   79.18   15.01  -2
  -5   1  -3   79.18   15.01   1
   1  -5   3   79.69   17.40  -2
  -5   1  -3   79.69   17.40   1
   1  -5   3  112.86   17.31  -2
  -5   1  -3  112.86   17.31   1
   4  -5  -3   84.37   15.30  -2
  -5   4   3   84.37   15.30   1
   1   4  -3  107.08   23.38  -2
   4   1   3  107.08   23.38   1
  -5   4   4  244.41   25.09  -2
   4  -5  -4  244.41   25.09   1
   1  -5   4  265.22   25.17  -2
  -5   1  -4  265.22   25.17   1
   4  -5  -4  251.90   22.57  -2
  -5   4   4  251.90   22.57   1
   4   1   5   13.59    4.66  -2
   1   4  -5   13.59    4.66   1
  -5   4   5   11.96    4.92  -2
   4  -5  -5   11.96    4.92   1
   1  -5   5   17.02    4.88  -2
  -5   1  -5   17.02    4.88   1
   1  -5   5   14.72    5.13  -2
  -5   1  -5   14.72    5.13   1
   4  -6   5   36.30    5.33  -2
  -6   4  -5   36.30    5.33   1
  -6   2   4  595.32   32.09  -2
   2  -6  -4  595.32   32.09   1
   2   4   4  681.93   39.03  -2
   4   2  -4  681.93   39.03   1
  -6   2   4  665.29   37.47  -2
   2  -6  -4  665.29   37.47   1
   2  -6  -4  702.87   36.61  -2
  -6   2   4  702.87   36.61   1
   4  -6   3  161.07   21.24  -2
  -6   4  -3  161.07   21.24   1
   4  -6   3  163.92   18.84  -2
  -6   4  -3  163.92   18.84   1
   2  -6  -3  198.71   23.73  -2
  -6   2   3  198.71   23.73   1
   4  -6   2  100.83   17.85  -2
  -6   4  -2  100.83   17.85   1
   2  -6  -2  106.90   16.72  -2
  -6   2   2  106.90   16.72   1
   4  -6   2  110.93   17.49  -2
  -6   4  -2  110.93   17.49   1
   2   4   2   99.86   19.51  -2
   4   2  -2   99.86   19.51   1
   4  -6   2   92.78   18.10  -2
  -6   4  -2   92.78   18.10   1
   4  -6   2  104.92   16.89  -2
  -6   4  -2  104.92   16.89   1
  -6   2   2   86.98   17.74  -2
   2  -6  -2   86.98   17.74   1
   4  -6   1  213.96   25.96  -2
  -6   4  -1  213.96   25.96   1
   4  -6   1  173.58   22.98  -2
  -6   4  -1  173.58   22.98   1
   4  -6   1  190.12   24.52  -2
  -6   4  -1  190.12   24.52   1
   4  -6   1  155.13   21.97  -2
  -6   4  -1  155.13   21.97   1
  -6   2   1  174.05   26.37  -2
   2  -6  -1  174.05   26.37   1
   2  -6  -1  174.02   24.28  -2
  -6   2   1  174.02   24.28   1
   4   2  -1  148.74   26.84  -2
   2   4   1  148.74   26.84   1
   4  -6   0  736.04   45.68  -2
  -6   4   0  736.04   45.68   1
   4   2   0  786.25   43.54  -2
   2   4   0  786.25   43.54   1
   4  -6   0  875.65   53.27  -2
  -6   4   0  875.65   53.27   1
   2  -6   0  704.98   43.84  -2
  -6   2   0  704.98   43.84   1
   2   4   0  752.53   55.87  -2
   4   2   0  752.53   55.87   1
  -6   2   0  761.14   53.20  -2
   2  -6   0  761.14   53.20   1
   2  -6   0  697.51   45.30  -2
  -6   2   0  697.51   45.30   1
  -6   4   1  216.28   32.95  -2
   4  -6  -1  216.28   32.95   1
   2  -6   1  215.67   22.35  -2
  -6   2  -1  215.67   22.35   1
   2  -6   1  187.13   23.54  -2
  -6   2  -1  187.13   23.54   1
   2   4  -1  201.48   29.52  -2
   4   2   1  201.48   29.52   1
   2  -6   1  212.13   27.25  -2
  -6   2  -1  212.13   27.25   1
   4  -6  -1  224.52   25.43  -2
  -6   4   1  224.52   25.43   1
   4  -6  -1  217.97   27.24  -2
  -6   4   1  217.97   27.24   1
   4   2   1  196.32   22.78  -2
   2   4  -1  196.32   22.78   1
  -6   2  -1  226.92   28.83  -2
   2  -6   1  226.92   28.83   1
   2  -6   1  243.50   31.65  -2
  -6   2  -1  243.50   31.65   1
   2  -6   2  708.04   54.77  -2
  -6   2  -2  708.04   54.77   1
   2  -6   2  832.78   45.55  -2
  -6   2  -2  832.78   45.55   1
   2  -6   2  770.18   42.88  -2
  -6   2  -2  770.18   42.88   1
   4  -6  -2  769.25   48.69  -2
  -6   4   2  769.25   48.69   1
   2   4  -2  789.29   63.47  -2
   4   2   2  789.29   63.47   1
   2  -6   2  858.83   55.05  -2
  -6   2  -2  858.83   55.05   1
   2   4  -2  807.18   59.86  -2
   4   2   2  807.18   59.86   1
   4  -6  -2  778.00   45.70  -2
  -6   4   2  778.00   45.70   1
   4   2   2  754.55   45.03  -2
   2   4  -2  754.55   45.03   1
   2  -6   3  238.68   24.25  -2
  -6   2  -3  238.68   24.25   1
   2  -6   3  230.35   23.76  -2
  -6   2  -3  230.35   23.76   1
  -6   4   3  203.22   20.55  -2
   4  -6  -3  203.22   20.55   1
   4  -6  -3  214.76   22.24  -2
  -6   4   3  214.76   22.24   1
   4   2   3  226.80   24.03  -2
   2   4  -3  226.80   24.03   1
   2  -6   4    7.37    4.54  -2
  -6   2  -4    7.37    4.54   1
  -6   4   4   21.28    6.80  -2
   4  -6  -4   21.28    6.80   1
   2  -6   4   12.96    5.17  -2
  -6   2  -4   12.96    5.17   1
  -7   3   4   98.37    9.35  -2
   3  -7  -4   98.37    9.35   1
   3   4   4  127.88   10.34  -2
   4   3  -4  127.88   10.34   1
   4  -7   3   24.29    7.36  -2
  -7   4  -3   24.29    7.36   1
   3   4   3   14.93    5.12  -2
   4   3  -3   14.93    5.12   1
  -7   3   3   17.94    6.29  -2
   3  -7  -3   17.94    6.29   1
   4  -7   2  558.29   37.32  -2
  -7   4  -2  558.29   37.32   1
   3  -7  -2  515.70   32.85  -2
  -7   3   2  515.70   32.85   1
   4  -7   2  525.82   34.67  -2
  -7   4  -2  525.82   34.67   1
   4  -7   2  499.73   32.45  -2
  -7   4  -2  499.73   32.45   1
   4  -7   2  501.31   36.96  -2
  -7   4  -2  501.31   36.96   1
   3   4   2  519.44   30.78  -2
   4   3  -2  519.44   30.78   1
   4  -7   1  138.78   19.17  -2
  -7   4  -1  138.78   19.17   1
   4  -7   1  133.86   19.59  -2
  -7   4  -1  133.86   19.59   1
   4  -7   1  175.51   23.49  -2
  -7   4  -1  175.51   23.49   1
   3  -7  -1  147.75   20.83  -2
  -7   3   1  147.75   20.83   1
   4  -7   0  131.06   18.11  -2
  -7   4   0  131.06   18.11   1
   4  -7   0  152.60   21.78  -2
  -7   4   0  152.60   21.78   1
   3  -7   1  123.13   16.48  -2
  -7   3  -1  123.13   16.48   1
   4  -7  -1  153.48   21.88  -2
  -7   4   1  153.48   21.88   1
   3  -7   1  156.52   20.87  -2
  -7   3  -1  156.52   20.87   1
   4   3   1  114.10   15.96  -2
   3   4  -1  114.10   15.96   1
   3  -7   2   79.80   13.28  -2
  -7   3  -2   79.80   13.28   1
   4   3   2  103.60   14.82  -2
   3   4  -2  103.60   14.82   1
   3  -7   3   44.15    8.98  -2
  -7   3  -3   44.15    8.98   1
   3  -7   3   22.86    6.75  -2
  -7   3  -3   22.86    6.75   1
   4   3   3   34.53    7.82  -2
   3   4  -3   34.53    7.82   1
   4   3   4  465.04   21.46  -2
   3   4  -4  465.04   21.46   1
   3  -7   4  512.84   19.61  -2
  -7   3  -4  512.84   19.61   1
   4   3   4  536.16   21.23  -2
   3   4  -4  536.16   21.23   1
   4  -8   0   60.36   11.47  -2
  -8   4   0   60.36   11.47   1
   4  -8   0   61.06   11.75  -2
  -8   4   0   61.06   11.75   1
   4  -8  -1   28.47    7.65  -2
  -8   4   1   28.47    7.65   1
   4  -8  -1   26.79    7.98  -2
  -8   4   1   26.79    7.98   1
   4  -8   1   19.51    6.85  -2
  -8   4  -1   19.51    6.85   1
   4  -8   1   30.64    7.77  -2
  -8   4  -1   30.64    7.77   1
   4  -8   2  172.29   12.79  -2
  -8   4  -2  172.29   12.79   1
   5  -3   5   43.19    8.99  -2
  -3   5  -5   43.19    8.99   1
  -2   5   5   40.41    9.02  -2
   5  -2  -5   40.41    9.02   1
  -3  -2   5   43.51   10.00  -2
  -2  -3  -5   43.51   10.00   1
  -2  -3  -5   42.12    8.73  -2
  -3  -2   5   42.12    8.73   1
  -2   5   4  229.87   30.71  -2
   5  -2  -4  229.87   30.71   1
  -2   5   4  254.00   29.27  -2
   5  -2  -4  254.00   29.27   1
  -2  -3  -4  284.05   28.84  -2
  -3  -2   4  284.05   28.84   1
  -3  -2   4  241.66   24.70  -2
  -2  -3  -4  241.66   24.70   1
   5  -3   3   80.73   15.63  -2
  -3   5  -3   80.73   15.63   1
  -3  -2   3   97.41   17.06  -2
  -2  -3  -3   97.41   17.06   1
  -2   5   3  131.64   23.06  -2
   5  -2  -3  131.64   23.06   1
  -3  -2   3   79.52   19.56  -2
  -2  -3  -3   79.52   19.56   1
  -2  -3  -3  140.83   21.69  -2
  -3  -2   3  140.83   21.69   1
   5  -2  -3   97.65   14.94  -2
  -2   5   3   97.65   14.94   1
   5  -3   2  706.91   41.53  -2
  -3   5  -2  706.91   41.53   1
  -3  -2   2  704.09   47.38  -2
  -2  -3  -2  704.09   47.38   1
   5  -3   2  659.00   38.75  -2
  -3   5  -2  659.00   38.75   1
  -3  -2   2  717.95   53.69  -2
  -2  -3  -2  717.95   53.69   1
  -2   5   2  682.18   48.36  -2
   5  -2  -2  682.18   48.36   1
  -2  -3  -2  751.75   46.91  -2
  -3  -2   2  751.75   46.91   1
  -2   5   2  774.72   52.70  -2
   5  -2  -2  774.72   52.70   1
  -3   5  -2  722.04   48.03  -2
   5  -3   2  722.04   48.03   1
   5  -2  -2  756.85   52.16  -2
  -2   5   2  756.85   52.16   1
   5  -2  -2  673.38   38.13  -2
  -2   5   2  673.38   38.13   1
   5  -3   2  716.29   36.52  -2
  -3   5  -2  716.29   36.52   1
  -2   5   1  439.17   35.11  -2
   5  -2  -1  439.17   35.11   1
  -2  -3  -1  418.31   32.89  -2
  -3  -2   1  418.31   32.89   1
  -3   5  -1  467.75   35.78  -2
   5  -3   1  467.75   35.78   1
   5  -3   1  501.58   29.74  -2
  -3   5  -1  501.58   29.74   1
   5  -3   1  474.54   30.37  -2
  -3   5  -1  474.54   30.37   1
   5  -2  -1  486.24   37.29  -2
  -2   5   1  486.24   37.29   1
   5  -2  -1  513.47   37.10  -2
  -2   5   1  513.47   37.10   1
   5  -3   1  535.36   34.63  -2
  -3   5  -1  535.36   34.63   1
   5  -2  -1  556.50   36.14  -2
  -2   5   1  556.50   36.14   1
   5  -3   1  609.38   36.16  -2
  -3   5  -1  609.38   36.16   1
  -3  -2   1  456.59   35.96  -2
  -2  -3  -1  456.59   35.96   1
  -3  -2   0  353.92   32.35  -2
  -2  -3   0  353.92   32.35   1
  -3   5   0  291.12   28.40  -2
   5  -3   0  291.12   28.40   1
   5  -3   0  341.51   26.44  -2
  -3   5   0  341.51   26.44   1
   5  -2   0  312.82   26.48  -2
  -2   5   0  312.82   26.48   1
   5  -2   0  371.88   31.42  -2
  -2   5   0  371.88   31.42   1
   5  -3   0  411.19   31.75  -2
  -3   5   0  411.19   31.75   1
  -2   5   0  390.97   35.76  -2
   5  -2   0  390.97   35.76   1
  -2  -3   1  106.20   19.47  -2
  -3  -2  -1  106.20   19.47   1
  -3   5   1  100.40   18.59  -2
   5  -3  -1  100.40   18.59   1
  -2   5  -1  107.81   19.40  -2
   5  -2   1  107.81   19.40   1
   5  -2   1   99.99   15.59  -2
  -2   5  -1   99.99   15.59   1
   5  -2   1  119.31   18.02  -2
  -2   5  -1  119.31   18.02   1
   5  -2   1   83.29   14.54  -2
  -2   5  -1   83.29   14.54   1
   5  -3  -1   79.38   13.96  -2
  -3   5   1   79.38   13.96   1
  -3   5   2  107.10   21.60  -2
   5  -3  -2  107.10   21.60   1
  -2  -3   2  197.44   28.10  -2
  -3  -2  -2  197.44   28.10   1
   5  -2   2  160.54   20.99  -2
  -2   5  -2  160.54   20.99   1
  -2  -3   2  206.62   30.23  -2
  -3  -2  -2  206.62   30.23   1
  -3  -2  -2  173.33   21.07  -2
  -2  -3   2  173.33   21.07   1
  -2   5  -2  158.48   25.89  -2
   5  -2   2  158.48   25.89   1
   5  -3  -2  159.92   19.96  -2
  -3   5   2  159.92   19.96   1
   5  -2   2  161.47   19.42  -2
  -2   5  -2  161.47   19.42   1
   5  -2   2  160.32   19.85  -2
  -2   5  -2  160.32   19.85   1
   5  -2   2  154.32   18.47  -2
  -2   5  -2  154.32   18.47   1
   5  -2   3   68.71   15.11  -2
  -2   5  -3   68.71   15.11   1
  -3   5   3   62.85   16.98  -2
   5  -3  -3   62.85   16.98   1
  -3   5   3   90.44   20.92  -2
   5  -3  -3   90.44   20.92   1
  -3   5   3   71.65   13.79  -2
   5  -3  -3   71.65   13.79   1
  -2  -3   3   67.88   18.13  -2
  -3  -2  -3   67.88   18.13   1
  -3  -2  -3   77.70   14.95  -2
  -2  -3   3   77.70   14.95   1
   5  -3  -3   74.69   13.39  -2
  -3   5   3   74.69   13.39   1
   5  -2   3   77.11   12.93  -2
  -2   5  -3   77.11   12.93   1
  -2   5  -3  100.33   22.47  -2
   5  -2   3  100.33   22.47   1
   5  -3  -3   79.46   12.13  -2
  -3   5   3   79.46   12.13   1
  -3   5   4  668.88   50.64  -2
   5  -3  -4  668.88   50.64   1
  -3   5   4  692.27   40.22  -2
   5  -3  -4  692.27   40.22   1
  -3  -2  -4  603.56   37.24  -2
  -2  -3   4  603.56   37.24   1
   5  -3  -4  706.46   35.68  -2
  -3   5   4  706.46   35.68   1
   5  -2   5   69.17   10.98  -2
  -2   5  -5   69.17   10.98   1
  -3   5   5   70.98   13.82  -2
   5  -3  -5   70.98   13.82   1
  -2  -3   5   67.25   12.38  -2
  -3  -2  -5   67.25   12.38   1
  -1   5   5   70.21   11.93  -2
   5  -1  -5   70.21   11.93   1
  -1   5   5   54.15   10.23  -2
   5  -1  -5   54.15   10.23   1
  -4  -1   5   46.53    8.94  -2
  -1  -4  -5   46.53    8.94   1
  -1  -4  -5   63.57   10.78  -2
  -4  -1   5   63.57   10.78   1
  -1   5   4  242.33   28.78  -2
   5  -1  -4  242.33   28.78   1
  -1  -4  -4  210.42   25.44  -2
  -4  -1   4  210.42   25.44   1
  -4  -1   4  250.85   26.57  -2
  -1  -4  -4  250.85   26.57   1
   5  -4   3   25.39    9.23  -2
  -4   5  -3   25.39    9.23   1
   5  -1  -3   27.88   11.45  -2
  -1   5   3   27.88   11.45   1
   5  -4   3   24.89    8.73  -2
  -4   5  -3   24.89    8.73   1
  -1   5   3   11.02    8.21  -2
   5  -1  -3   11.02    8.21   1
  -1  -4  -3   21.92    9.92  -2
  -4  -1   3   21.92    9.92   1
   5  -1  -3   36.36    9.39  -2
  -1   5   3   36.36    9.39   1
   5  -4   2  192.50   22.57  -2
  -4   5  -2  192.50   22.57   1
  -4  -1   2  177.83   22.25  -2
  -1  -4  -2  177.83   22.25   1
  -4  -1   2  206.98   27.32  -2
  -1  -4  -2  206.98   27.32   1
  -1   5   2  182.16   26.85  -2
   5  -1  -2  182.16   26.85   1
  -1  -4  -2  154.82   22.88  -2
  -4  -1   2  154.82   22.88   1
   5  -1  -2  195.74   28.53  -2
  -1   5   2  195.74   28.53   1
   5  -1  -2  191.18   23.26  -2
  -1   5   2  191.18   23.26   1
   5  -1  -2  169.60   20.52  -2
  -1   5   2  169.60   20.52   1
   5  -4   1   67.59   11.80  -2
  -4   5  -1   67.59   11.80   1
   5  -1  -1   71.27   15.78  -2
  -1   5   1   71.27   15.78   1
   5  -4   1   48.05   12.57  -2
  -4   5  -1   48.05   12.57   1
   5  -4   1   60.96   13.28  -2
  -4   5  -1   60.96   13.28   1
  -1   5   1   75.15   13.76  -2
   5  -1  -1   75.15   13.76   1
  -4  -1   1   69.27   14.89  -2
  -1  -4  -1   69.27   14.89   1
  -1  -4  -1   65.24   14.32  -2
  -4  -1   1   65.24   14.32   1
   5  -4   1   63.64   10.92  -2
  -4   5  -1   63.64   10.92   1
   5  -4   1   63.22   11.02  -2
  -4   5  -1   63.22   11.02   1
  -4  -1   1   64.20   14.64  -2
  -1  -4  -1   64.20   14.64   1
   5  -1  -1   80.57   15.94  -2
  -1   5   1   80.57   15.94   1
   5  -4   0  200.04   23.32  -2
  -4   5   0  200.04   23.32   1
  -1   5   0  200.23   27.68  -2
   5  -1   0  200.23   27.68   1
   5  -4   0  162.88   18.50  -2
  -4   5   0  162.88   18.50   1
   5  -4   0  179.00   19.10  -2
  -4   5   0  179.00   19.10   1
   5  -1   0  162.11   20.60  -2
  -1   5   0  162.11   20.60   1
   5  -4   0  183.97   20.11  -2
  -4   5   0  183.97   20.11   1
   5  -1   0  172.79   21.58  -2
  -1   5   0  172.79   21.58   1
  -1  -4   0  164.83   17.51  -2
  -4  -1   0  164.83   17.51   1
  -4  -1  -1  350.14   33.69  -2
  -1  -4   1  350.14   33.69   1
  -1   5  -1  366.52   38.57  -2
   5  -1   1  366.52   38.57   1
   5  -4  -1  341.56   28.15  -2
  -4   5   1  341.56   28.15   1
   5  -1   1  376.14   31.46  -2
  -1   5  -1  376.14   31.46   1
  -1  -4   1  371.61   39.02  -2
  -4  -1  -1  371.61   39.02   1
  -1  -4   2  237.70   33.17  -2
  -4  -1  -2  237.70   33.17   1
  -1  -4   2  270.18   34.92  -2
  -4  -1  -2  270.18   34.92   1
  -4   5   2  240.55   25.79  -2
   5  -4  -2  240.55   25.79   1
  -4   5   2  264.76   36.24  -2
   5  -4  -2  264.76   36.24   1
   5  -4  -2  215.87   23.41  -2
  -4   5   2  215.87   23.41   1
  -1   5  -2  294.77   37.25  -2
   5  -1   2  294.77   37.25   1
   5  -1   2  243.68   25.41  -2
  -1   5  -2  243.68   25.41   1
   5  -4  -2  243.40   23.13  -2
  -4   5   2  243.40   23.13   1
   5  -1   3  118.22   19.34  -2
  -1   5  -3  118.22   19.34   1
  -4   5   3   93.39   19.71  -2
   5  -4  -3   93.39   19.71   1
  -4   5   3  108.21   17.54  -2
   5  -4  -3  108.21   17.54   1
  -1  -4   3  105.03   22.82  -2
  -4  -1  -3  105.03   22.82   1
   5  -4  -3   83.14   14.49  -2
  -4   5   3   83.14   14.49   1
   5  -1   3  114.44   17.21  -2
  -1   5  -3  114.44   17.21   1
  -1   5  -3  135.23   26.17  -2
   5  -1   3  135.23   26.17   1
   5  -4  -3   89.61   13.66  -2
  -4   5   3   89.61   13.66   1
  -4   5   4  258.44   24.49  -2
   5  -4  -4  258.44   24.49   1
  -1  -4   4  269.15   28.26  -2
  -4  -1  -4  269.15   28.26   1
   5  -4  -4  207.01   19.01  -2
  -4   5   4  207.01   19.01   1
  -4   5   4  233.76   27.80  -2
   5  -4  -4  233.76   27.80   1
   5  -1   5   14.65    4.97  -2
  -1   5  -5   14.65    4.97   1
  -4   5   5   18.18    6.17  -2
   5  -4  -5   18.18    6.17   1
  -1  -4   5   13.99    4.17  -2
  -4  -1  -5   13.99    4.17   1
  -1  -4   5   10.79    4.88  -2
  -4  -1  -5   10.79    4.88   1
   5  -4  -5   14.53    4.26  -2
  -4   5   5   14.53    4.26   1
   5  -5   5   17.56    6.57  -2
  -5   5  -5   17.56    6.57   1
   0   5   5   36.01    7.50  -2
   5   0  -5   36.01    7.50   1
   0  -5  -5   31.05    6.49  -2
  -5   0   5   31.05    6.49   1
   0   5   4  360.89   32.44  -2
   5   0  -4  360.89   32.44   1
   0   5   4  323.60   30.77  -2
   5   0  -4  323.60   30.77   1
  -5   0   4  373.03   31.35  -2
   0  -5  -4  373.03   31.35   1
   0  -5  -4  398.81   32.19  -2
  -5   0   4  398.81   32.19   1
   5  -5   3  352.86   33.53  -2
  -5   5  -3  352.86   33.53   1
   5  -5   3  339.90   30.54  -2
  -5   5  -3  339.90   30.54   1
   0   5   3  387.04   39.60  -2
   5   0  -3  387.04   39.60   1
   0  -5  -3  370.34   34.76  -2
  -5   0   3  370.34   34.76   1
   5  -5   2  183.28   25.04  -2
  -5   5  -2  183.28   25.04   1
  -5   0   2  158.87   22.22  -2
   0  -5  -2  158.87   22.22   1
   0   5   2  178.57   27.47  -2
   5   0  -2  178.57   27.47   1
   0  -5  -2  185.36   25.42  -2
  -5   0   2  185.36   25.42   1
   5   0  -2  173.64   28.45  -2
   0   5   2  173.64   28.45   1
   5   0  -2  211.71   24.78  -2
   0   5   2  211.71   24.78   1
   5   0  -2  173.40   20.88  -2
   0   5   2  173.40   20.88   1
   0  -5  -2  190.88   23.98  -2
  -5   0   2  190.88   23.98   1
   5  -5   1  162.95   22.51  -2
  -5   5  -1  162.95   22.51   1
   5  -5   1  160.42   23.06  -2
  -5   5  -1  160.42   23.06   1
   5  -5   1  164.71   20.59  -2
  -5   5  -1  164.71   20.59   1
  -5   0   1  207.92   26.88  -2
   0  -5  -1  207.92   26.88   1
   5   0  -1  193.23   28.63  -2
   0   5   1  193.23   28.63   1
   5  -5   1  179.41   20.17  -2
  -5   5  -1  179.41   20.17   1
   5   0  -1  189.55   25.35  -2
   0   5   1  189.55   25.35   1
   0  -5  -1  173.84   21.66  -2
  -5   0   1  173.84   21.66   1
   5  -5   1  174.95   19.43  -2
  -5   5  -1  174.95   19.43   1
  -5   5   0 2066.90   89.76  -2
   5  -5   0 2066.90   89.76   1
   5  -5   0 2209.89   79.45  -2
  -5   5   0 2209.89   79.45   1
   0  -5   0 2097.37   68.07  -2
  -5   0   0 2097.37   68.07   1
   0   5   0 2054.95   94.60  -2
   5   0   0 2054.95   94.60   1
   5   0   0 1941.20   79.12  -2
   0   5   0 1941.20   79.12   1
   5  -5   0 2197.01   72.75  -2
  -5   5   0 2197.01   72.75   1
   5  -5   0 2111.61   69.64  -2
  -5   5   0 2111.61   69.64   1
   5   0   0 1985.47   73.85  -2
   0   5   0 1985.47   73.85   1
   0  -5   0 2162.27   70.19  -2
  -5   0   0 2162.27   70.19   1
   5  -5   0 2108.48   69.22  -2
  -5   5   0 2108.48   69.22   1
   5  -5  -1    5.32    4.95  -2
  -5   5   1    5.32    4.95   1
   0  -5   1   12.07    7.78  -2
  -5   0  -1   12.07    7.78   1
  -5   5   1    5.02    5.72  -2
   5  -5  -1    5.02    5.72   1
   0  -5   1    1.54    4.06  -2
  -5   0  -1    1.54    4.06   1
   5  -5  -1    1.43    2.65  -2
  -5   5   1    1.43    2.65   1
   5   0   1    6.24    5.81  -2
   0   5  -1    6.24    5.81   1
   0   5  -1   10.26    7.55  -2
   5   0   1   10.26    7.55   1
  -5   0  -1    3.87    5.09  -2
   0  -5   1    3.87    5.09   1
   5  -5  -2   84.44   14.85  -2
  -5   5   2   84.44   14.85   1
  -5   5   2   77.88   21.24  -2
   5  -5  -2   77.88   21.24   1
   0  -5   2  115.15   23.83  -2
  -5   0  -2  115.15   23.83   1
   0  -5   2  106.52   21.56  -2
  -5   0  -2  106.52   21.56   1
   0  -5   2   63.32   14.72  -2
  -5   0  -2   63.32   14.72   1
   5  -5  -2   89.06   15.76  -2
  -5   5   2   89.06   15.76   1
   0   5  -2  114.93   25.03  -2
   5   0   2  114.93   25.03   1
  -5   0  -2   93.80   18.76  -2
   0  -5   2   93.80   18.76   1
   0  -5   3  286.15   24.42  -2
  -5   0  -3  286.15   24.42   1
  -5   5   3  317.10   29.33  -2
   5  -5  -3  317.10   29.33   1
   0  -5   3  277.87   27.11  -2
  -5   0  -3  277.87   27.11   1
   5  -5  -3  286.44   26.15  -2
  -5   5   3  286.44   26.15   1
   5   0   3  317.67   29.19  -2
   0   5  -3  317.67   29.19   1
   0  -5   4  107.78   13.45  -2
  -5   0  -4  107.78   13.45   1
  -5   5   4   90.08   13.73  -2
   5  -5  -4   90.08   13.73   1
   5  -5  -4   94.63   13.75  -2
  -5   5   4   94.63   13.75   1
   5   0   4  102.13   14.49  -2
   0   5  -4  102.13   14.49   1
  -5   5   4   84.03   13.89  -2
   5  -5  -4   84.03   13.89   1
   5   0   5   73.55    8.84  -2
   0   5  -5   73.55    8.84   1
   0  -5   5   72.26    8.13  -2
  -5   0  -5   72.26    8.13   1
   5  -6   4   78.99   11.63  -2
  -6   5  -4   78.99   11.63   1
   1   5   4   82.10   13.47  -2
   5   1  -4   82.10   13.47   1
  -6   1   4   72.58   12.19  -2
   1  -6  -4   72.58   12.19   1
   1   5   3   92.75   17.89  -2
   5   1  -3   92.75   17.89   1
   1   5   2  120.20   21.80  -2
   5   1  -2  120.20   21.80   1
   5   1  -2  135.66   18.42  -2
   1   5   2  135.66   18.42   1
   5   1  -2  134.22   17.93  -2
   1   5   2  134.22   17.93   1
   5  -6   1  311.85   31.90  -2
  -6   5  -1  311.85   31.90   1
   5  -6   1  278.15   27.96  -2
  -6   5  -1  278.15   27.96   1
  -6   1   1  276.45   32.72  -2
   1  -6  -1  276.45   32.72   1
   5   1  -1  276.26   35.86  -2
   1   5   1  276.26   35.86   1
   5  -6   1  256.15   27.29  -2
  -6   5  -1  256.15   27.29   1
   5   1  -1  369.80   34.30  -2
   1   5   1  369.80   34.30   1
   1  -6  -1  260.25   28.64  -2
  -6   1   1  260.25   28.64   1
   5  -6   0  108.15   16.87  -2
  -6   5   0  108.15   16.87   1
   5  -6   0  139.30   21.34  -2
  -6   5   0  139.30   21.34   1
   1  -6   0  139.98   19.28  -2
  -6   1   0  139.98   19.28   1
   5  -6   0  119.36   18.56  -2
  -6   5   0  119.36   18.56   1
   5  -6   0  141.99   19.92  -2
  -6   5   0  141.99   19.92   1
  -6   5   0  142.42   25.46  -2
   5  -6   0  142.42   25.46   1
   1   5   0  120.79   24.13  -2
   5   1   0  120.79   24.13   1
   5   1   0  114.62   18.03  -2
   1   5   0  114.62   18.03   1
   1  -6   0  111.16   17.55  -2
  -6   1   0  111.16   17.55   1
   5  -6   0  128.96   20.51  -2
  -6   5   0  128.96   20.51   1
  -6   1   0  113.34   20.99  -2
   1  -6   0  113.34   20.99   1
   5   1   0  103.70   20.48  -2
   1   5   0  103.70   20.48   1
   5  -6  -1  138.18   19.56  -2
  -6   5   1  138.18   19.56   1
   1  -6   1  109.12   22.80  -2
  -6   1  -1  109.12   22.80   1
   1  -6   1  111.77   16.01  -2
  -6   1  -1  111.77   16.01   1
   1  -6   1  112.17   18.05  -2
  -6   1  -1  112.17   18.05   1
   1  -6   1  144.65   21.99  -2
  -6   1  -1  144.65   21.99   1
  -6   5   1  121.29   25.73  -2
   5  -6  -1  121.29   25.73   1
   5   1   1  108.60   17.68  -2
   1   5  -1  108.60   17.68   1
   1   5  -1  120.17   25.11  -2
   5   1   1  120.17   25.11   1
  -6   1  -1  109.42   20.23  -2
   1  -6   1  109.42   20.23   1
   1  -6   2  635.48   39.47  -2
  -6   1  -2  635.48   39.47   1
   1  -6   2  659.35   45.50  -2
  -6   1  -2  659.35   45.50   1
   5  -6  -2  774.37   45.55  -2
  -6   5   2  774.37   45.55   1
   5   1   2  706.31   44.13  -2
   1   5  -2  706.31   44.13   1
   1  -6   3   63.86   12.39  -2
  -6   1  -3   63.86   12.39   1
   1  -6   3   55.78    9.89  -2
  -6   1  -3   55.78    9.89   1
  -6   5   3   52.56   11.50  -2
   5  -6  -3   52.56   11.50   1
   5  -6  -3   63.16   12.29  -2
  -6   5   3   63.16   12.29   1
   1  -6   4  152.21   15.18  -2
  -6   1  -4  152.21   15.18   1
   1  -6   4  134.33   11.76  -2
  -6   1  -4  134.33   11.76   1
  -6   5   4  142.02   14.49  -2
   5  -6  -4  142.02   14.49   1
   1  -6   4  152.91   15.79  -2
  -6   1  -4  152.91   15.79   1
   5  -6  -4  112.67   11.90  -2
  -6   5   4  112.67   11.90   1
   5   1   4  145.36   15.05  -2
   1   5  -4  145.36   15.05   1
   5  -7   3   71.19   11.68  -2
  -7   5  -3   71.19   11.68   1
  -7   2   3   54.96   10.67  -2
   2  -7  -3   54.96   10.67   1
   2   5   3   65.36    8.68  -2
   5   2  -3   65.36    8.68   1
   5  -7   2  359.10   29.56  -2
  -7   5  -2  359.10   29.56   1
   2   5   2  331.41   30.88  -2
   5   2  -2  331.41   30.88   1
   2  -7  -2  331.01   23.15  -2
  -7   2   2  331.01   23.15   1
   5  -7   1   72.80   14.48  -2
  -7   5  -1   72.80   14.48   1
   5  -7   1   74.32   13.98  -2
  -7   5  -1   74.32   13.98   1
   2  -7  -1   57.51   12.29  -2
  -7   2   1   57.51   12.29   1
   2   5   1   64.04   15.21  -2
   5   2  -1   64.04   15.21   1
   5  -7   1   81.08   14.78  -2
  -7   5  -1   81.08   14.78   1
   5   2  -1   87.17   14.69  -2
   2   5   1   87.17   14.69   1
   5  -7   0  195.49   23.10  -2
  -7   5   0  195.49   23.10   1
   5  -7   0  246.22   26.58  -2
  -7   5   0  246.22   26.58   1
   2  -7   0  223.57   25.93  -2
  -7   2   0  223.57   25.93   1
   5  -7   0  222.62   24.35  -2
  -7   5   0  222.62   24.35   1
   5  -7  -1   99.52   17.38  -2
  -7   5   1   99.52   17.38   1
   2  -7   1  111.59   17.19  -2
  -7   2  -1  111.59   17.19   1
   2  -7   1  127.20   19.97  -2
  -7   2  -1  127.20   19.97   1
   5  -7  -1  103.56   16.40  -2
  -7   5   1  103.56   16.40   1
   5   2   1  110.09   15.84  -2
   2   5  -1  110.09   15.84   1
   2  -7   2   59.36   10.51  -2
  -7   2  -2   59.36   10.51   1
   2  -7   2   62.39   12.41  -2
  -7   2  -2   62.39   12.41   1
   5  -7  -2   71.90   12.78  -2
  -7   5   2   71.90   12.78   1
   5   2   2   76.17   12.77  -2
   2   5  -2   76.17   12.77   1
  -7   5   3   55.16    9.87  -2
   5  -7  -3   55.16    9.87   1
   5  -7  -3   60.41    9.45  -2
  -7   5   3   60.41    9.45   1
   5   2   3   60.80    9.93  -2
   2   5  -3   60.80    9.93   1
   2  -7   4   17.22    3.34  -2
  -7   2  -4   17.22    3.34   1
   5  -8   2   76.72    9.68  -2
  -8   5  -2   76.72    9.68   1
  -8   3   2   55.53    8.38  -2
   3  -8  -2   55.53    8.38   1
   3  -8  -2   66.98   10.33  -2
  -8   3   2   66.98   10.33   1
   5  -8   1   47.08    8.82  -2
  -8   5  -1   47.08    8.82   1
   3  -8  -1   52.21    9.28  -2
  -8   3   1   52.21    9.28   1
   3  -8  -1   48.28    9.85  -2
  -8   3   1   48.28    9.85   1
   5  -8   0  171.34   18.21  -2
  -8   5   0  171.34   18.21   1
   3  -8   0  170.50   18.47  -2
  -8   3   0  170.50   18.47   1
   3  -8   0  179.01   19.44  -2
  -8   3   0  179.01   19.44   1
   5   3   0  187.42   17.78  -2
   3   5   0  187.42   17.78   1
   3  -8   1   39.16    9.14  -2
  -8   3  -1   39.16    9.14   1
   5   3   2   57.16    7.16  -2
   3   5  -2   57.16    7.16   1
   6  -3   0 1199.01   53.79  -2
  -3   6   0 1199.01   53.79   1
   6  -3   0 1556.81   67.57  -2
  -3   6   0 1556.81   67.57   1
  -3   6   1  100.22   18.04  -2
   6  -3  -1  100.22   18.04   1
   6  -3   1   91.74   14.17  -2
  -3   6  -1   91.74   14.17   1
   6  -3   1  102.35   17.22  -2
  -3   6  -1  102.35   17.22   1
   6  -3   1  102.43   16.91  -2
  -3   6  -1  102.43   16.91   1
   6  -3  -1  121.99   18.84  -2
  -3   6   1  121.99   18.84   1
  -3   6   1   83.31   17.72  -2
   6  -3  -1   83.31   17.72   1
   6  -3   2   63.56   12.47  -2
  -3   6  -2   63.56   12.47   1
  -3  -3   2   57.70   16.45  -2
  -3  -3  -2   57.70   16.45   1
  -3   6   2   76.80   16.25  -2
   6  -3  -2   76.80   16.25   1
   6  -3  -2   79.57   14.71  -2
  -3   6   2   79.57   14.71   1
  -3   6   2   59.21   16.08  -2
   6  -3  -2   59.21   16.08   1
   6  -3   2   71.57   12.58  -2
  -3   6  -2   71.57   12.58   1
   6  -3   3  295.35   26.44  -2
  -3   6  -3  295.35   26.44   1
  -3   6   3  325.19   35.14  -2
   6  -3  -3  325.19   35.14   1
  -3  -3  -3  259.86   25.58  -2
  -3  -3   3  259.86   25.58   1
   6  -3  -3  312.93   26.05  -2
  -3   6   3  312.93   26.05   1
   6  -3  -3  244.96   19.63  -2
  -3   6   3  244.96   19.63   1
   6  -3   4   73.27   12.37  -2
  -3   6  -4   73.27   12.37   1
  -3   6   4   58.88   10.54  -2
   6  -3  -4   58.88   10.54   1
   6  -3  -4   62.53    9.81  -2
  -3   6   4   62.53    9.81   1
  -3   6   5   27.10    5.50  -2
   6  -3  -5   27.10    5.50   1
  -3  -3   5   26.07    5.42  -2
  -3  -3  -5   26.07    5.42   1
   6  -4   4  751.07   36.63  -2
  -4   6  -4  751.07   36.63   1
  -2   6   4  647.90   41.39  -2
   6  -2  -4  647.90   41.39   1
   6  -4   4  748.96   36.00  -2
  -4   6  -4  748.96   36.00   1
  -2   6   4  687.12   38.90  -2
   6  -2  -4  687.12   38.90   1
  -2  -4  -4  668.81   35.50  -2
  -4  -2   4  668.81   35.50   1
   6  -4   3  194.38   21.65  -2
  -4   6  -3  194.38   21.65   1
   6  -4   3  147.91   20.29  -2
  -4   6  -3  147.91   20.29   1
  -2  -4  -3  200.94   24.47  -2
  -4  -2   3  200.94   24.47   1
   6  -2  -3  155.95   18.17  -2
  -2   6   3  155.95   18.17   1
   6  -4   2  123.67   17.07  -2
  -4   6  -2  123.67   17.07   1
   6  -4   2   88.60   16.91  -2
  -4   6  -2   88.60   16.91   1
   6  -4   2   99.62   15.71  -2
  -4   6  -2   99.62   15.71   1
  -4  -2   2  133.88   23.48  -2
  -2  -4  -2  133.88   23.48   1
  -2   6   2  125.69   21.79  -2
   6  -2  -2  125.69   21.79   1
   6  -2  -2  114.89   17.82  -2
  -2   6   2  114.89   17.82   1
   6  -2  -2  111.20   16.46  -2
  -2   6   2  111.20   16.46   1
   6  -4   1  155.11   20.53  -2
  -4   6  -1  155.11   20.53   1
  -4  -2   1  158.83   25.08  -2
  -2  -4  -1  158.83   25.08   1
   6  -4   1  174.54   18.76  -2
  -4   6  -1  174.54   18.76   1
   6  -2  -1  189.04   25.41  -2
  -2   6   1  189.04   25.41   1
   6  -2  -1  173.25   22.36  -2
  -2   6   1  173.25   22.36   1
  -2  -4  -1  144.47   18.29  -2
  -4  -2   1  144.47   18.29   1
  -2   6   1  141.23   21.26  -2
   6  -2  -1  141.23   21.26   1
  -2   6   0  763.08   55.78  -2
   6  -2   0  763.08   55.78   1
   6  -4   0  682.01   37.12  -2
  -4   6   0  682.01   37.12   1
   6  -4   0  739.55   39.71  -2
  -4   6   0  739.55   39.71   1
   6  -4   0  847.61   45.01  -2
  -4   6   0  847.61   45.01   1
  -2   6  -1  180.34   28.44  -2
   6  -2   1  180.34   28.44   1
   6  -4  -1  184.08   21.79  -2
  -4   6   1  184.08   21.79   1
   6  -4  -1  222.66   24.50  -2
  -4   6   1  222.66   24.50   1
   6  -2   1  221.65   25.09  -2
  -2   6  -1  221.65   25.09   1
   6  -2   1  205.29   25.37  -2
  -2   6  -1  205.29   25.37   1
   6  -2   1  250.52   26.49  -2
  -2   6  -1  250.52   26.49   1
  -4   6   1  201.67   29.57  -2
   6  -4  -1  201.67   29.57   1
  -2  -4   1  189.74   28.20  -2
  -4  -2  -1  189.74   28.20   1
  -2  -4   2  716.87   56.30  -2
  -4  -2  -2  716.87   56.30   1
   6  -2   2  717.38   40.75  -2
  -2   6  -2  717.38   40.75   1
  -4   6   2  766.07   50.02  -2
   6  -4  -2  766.07   50.02   1
  -2  -4   2  693.41   56.15  -2
  -4  -2  -2  693.41   56.15   1
  -4   6   2  728.15   58.62  -2
   6  -4  -2  728.15   58.62   1
  -2   6  -2  871.77   64.53  -2
   6  -2   2  871.77   64.53   1
   6  -4  -2  781.39   44.48  -2
  -4   6   2  781.39   44.48   1
   6  -4  -2  868.63   47.18  -2
  -4   6   2  868.63   47.18   1
   6  -2   2  762.06   43.37  -2
  -2   6  -2  762.06   43.37   1
   6  -2   2  853.35   46.19  -2
  -2   6  -2  853.35   46.19   1
   6  -2   2  838.52   43.23  -2
  -2   6  -2  838.52   43.23   1
   6  -4  -2  768.54   40.47  -2
  -4   6   2  768.54   40.47   1
  -4   6   3  215.48   26.77  -2
   6  -4  -3  215.48   26.77   1
   6  -2   3  235.28   23.92  -2
  -2   6  -3  235.28   23.92   1
   6  -4  -3  224.17   22.87  -2
  -4   6   3  224.17   22.87   1
   6  -4  -3  221.63   19.20  -2
  -4   6   3  221.63   19.20   1
   6  -2   4    7.66    4.55  -2
  -2   6  -4    7.66    4.55   1
  -4   6   4   13.36    5.98  -2
   6  -4  -4   13.36    5.98   1
  -2  -4   4   14.34    6.09  -2
  -4  -2  -4   14.34    6.09   1
   6  -4  -4   16.20    5.33  -2
  -4   6   4   16.20    5.33   1
   6  -5   4   62.73   11.81  -2
  -5   6  -4   62.73   11.81   1
  -1   6   4   74.62   12.66  -2
   6  -1  -4   74.62   12.66   1
   6  -5   3   70.08   15.10  -2
  -5   6  -3   70.08   15.10   1
  -5  -1   3   92.86   15.53  -2
  -1  -5  -3   92.86   15.53   1
  -1   6   3   81.95   17.03  -2
   6  -1  -3   81.95   17.03   1
   6  -1  -3   85.15   12.84  -2
  -1   6   3   85.15   12.84   1
   6  -5   2   85.49   17.51  -2
  -5   6  -2   85.49   17.51   1
   6  -5   2  101.02   16.97  -2
  -5   6  -2  101.02   16.97   1
  -1   6   2  129.48   22.26  -2
   6  -1  -2  129.48   22.26   1
   6  -1  -2  143.50   20.72  -2
  -1   6   2  143.50   20.72   1
   6  -1  -2  118.22   16.66  -2
  -1   6   2  118.22   16.66   1
  -5   6  -1  259.90   32.40  -2
   6  -5   1  259.90   32.40   1
   6  -5   1  285.63   29.50  -2
  -5   6  -1  285.63   29.50   1
  -5  -1   1  262.70   31.09  -2
  -1  -5  -1  262.70   31.09   1
   6  -1  -1  309.87   31.61  -2
  -1   6   1  309.87   31.61   1
   6  -1  -1  285.22   28.98  -2
  -1   6   1  285.22   28.98   1
  -1  -5  -1  235.13   24.80  -2
  -5  -1   1  235.13   24.80   1
   6  -5   1  274.34   24.63  -2
  -5   6  -1  274.34   24.63   1
   6  -5   0  107.19   18.88  -2
  -5   6   0  107.19   18.88   1
   6  -5   0  105.04   15.84  -2
  -5   6   0  105.04   15.84   1
   6  -5   0  128.29   17.57  -2
  -5   6   0  128.29   17.57   1
  -1   6   0  131.34   24.85  -2
   6  -1   0  131.34   24.85   1
  -5  -1   0  111.53   21.93  -2
  -1  -5   0  111.53   21.93   1
   6  -1   0  128.67   20.15  -2
  -1   6   0  128.67   20.15   1
   6  -5   0  146.45   19.23  -2
  -5   6   0  146.45   19.23   1
  -5   6   0  103.71   21.67  -2
   6  -5   0  103.71   21.67   1
  -1  -5   1  111.32   22.98  -2
  -5  -1  -1  111.32   22.98   1
  -5  -1  -1  130.50   23.52  -2
  -1  -5   1  130.50   23.52   1
  -5   6   1  139.74   26.18  -2
   6  -5  -1  139.74   26.18   1
   6  -5  -1  108.81   17.02  -2
  -5   6   1  108.81   17.02   1
   6  -5  -1  109.99   17.16  -2
  -5   6   1  109.99   17.16   1
  -1   6  -1  116.49   24.41  -2
   6  -1   1  116.49   24.41   1
   6  -1   1  134.90   20.24  -2
  -1   6  -1  134.90   20.24   1
   6  -5  -1  154.57   20.09  -2
  -5   6   1  154.57   20.09   1
   6  -1   2  696.72   40.60  -2
  -1   6  -2  696.72   40.60   1
   6  -5  -2  731.99   43.00  -2
  -5   6   2  731.99   43.00   1
   6  -1   2  654.60   41.88  -2
  -1   6  -2  654.60   41.88   1
   6  -1   2  719.94   41.47  -2
  -1   6  -2  719.94   41.47   1
   6  -5  -2  716.47   39.84  -2
  -5   6   2  716.47   39.84   1
   6  -1   3   60.12   12.09  -2
  -1   6  -3   60.12   12.09   1
  -5   6   3   62.76   10.94  -2
   6  -5  -3   62.76   10.94   1
   6  -5  -3   53.76   10.91  -2
  -5   6   3   53.76   10.91   1
   6  -1   3   67.37   12.24  -2
  -1   6  -3   67.37   12.24   1
   6  -1   4  122.66   14.12  -2
  -1   6  -4  122.66   14.12   1
  -1  -5   4  115.34   13.57  -2
  -5  -1  -4  115.34   13.57   1
  -5   6   4  135.08   12.24  -2
   6  -5  -4  135.08   12.24   1
   0   6   4   41.48    8.15  -2
   6   0  -4   41.48    8.15   1
  -6   0   4   35.46    6.48  -2
   0  -6  -4   35.46    6.48   1
   6  -6   3   17.67    6.42  -2
  -6   6  -3   17.67    6.42   1
   6   0  -3   18.65    5.38  -2
   0   6   3   18.65    5.38   1
   6  -6   2 1127.45   54.54  -2
  -6   6  -2 1127.45   54.54   1
   0   6   2 1057.29   59.61  -2
   6   0  -2 1057.29   59.61   1
   6   0  -2 1156.94   51.22  -2
   0   6   2 1156.94   51.22   1
   6   0  -2 1018.13   43.29  -2
   0   6   2 1018.13   43.29   1
   6  -6   1   62.04   11.62  -2
  -6   6  -1   62.04   11.62   1
   6  -6   1   60.56   14.13  -2
  -6   6  -1   60.56   14.13   1
   0   6   1   64.36   16.40  -2
   6   0  -1   64.36   16.40   1
   6   0  -1   67.31   14.47  -2
   0   6   1   67.31   14.47   1
   6   0  -1   61.37   13.94  -2
   0   6   1   61.37   13.94   1
   6  -6   0   52.20   11.74  -2
  -6   6   0   52.20   11.74   1
   0  -6   0   51.51   10.53  -2
  -6   0   0   51.51   10.53   1
   0  -6   0   58.66   12.88  -2
  -6   0   0   58.66   12.88   1
   6  -6   0   40.38   10.24  -2
  -6   6   0   40.38   10.24   1
   6   0   0   78.07   16.91  -2
   0   6   0   78.07   16.91   1
   6  -6  -1  564.63   37.03  -2
  -6   6   1  564.63   37.03   1
   0  -6   1  519.91   35.33  -2
  -6   0  -1  519.91   35.33   1
   0  -6   1  511.54   36.20  -2
  -6   0  -1  511.54   36.20   1
   6  -6  -1  530.99   36.40  -2
  -6   6   1  530.99   36.40   1
   6   0   1  582.57   39.93  -2
   0   6  -1  582.57   39.93   1
   0  -6   2   29.52    8.19  -2
  -6   0  -2   29.52    8.19   1
  -6   6   2   23.11    7.05  -2
   6  -6  -2   23.11    7.05   1
   6   0   2   20.42    7.70  -2
   0   6  -2   20.42    7.70   1
   6   0   3  134.11   16.36  -2
   0   6  -3  134.11   16.36   1
   0  -6   3  119.00   15.01  -2
  -6   0  -3  119.00   15.01   1
  -6   6   3  127.09   14.07  -2
   6  -6  -3  127.09   14.07   1
   6  -6  -3  118.55   15.48  -2
  -6   6   3  118.55   15.48   1
   6   0   3  126.58   15.88  -2
   0   6  -3  126.58   15.88   1
   6   0   4  126.78   11.60  -2
   0   6  -4  126.78   11.60   1
   0  -6   4  133.07   11.60  -2
  -6   0  -4  133.07   11.60   1
   0  -6   4  155.31   12.95  -2
  -6   0  -4  155.31   12.95   1
   6  -6  -4  111.42   10.24  -2
  -6   6   4  111.42   10.24   1
   6  -7   3  119.84   12.41  -2
  -7   6  -3  119.84   12.41   1
   1   6   3  116.76   13.77  -2
   6   1  -3  116.76   13.77   1
   1   6   2   94.52   15.96  -2
   6   1  -2   94.52   15.96   1
   6  -7   1   75.25   14.02  -2
  -7   6  -1   75.25   14.02   1
   1  -7  -1   60.92   11.00  -2
  -7   1   1   60.92   11.00   1
   1   6   1   53.60   13.95  -2
   6   1  -1   53.60   13.95   1
   1  -7  -1   86.25   14.37  -2
  -7   1   1   86.25   14.37   1
   6   1  -1   57.27   11.59  -2
   1   6   1   57.27   11.59   1
   6   1  -1   69.74   12.60  -2
   1   6   1   69.74   12.60   1
   1  -7   0 1398.06   57.22  -2
  -7   1   0 1398.06   57.22   1
   6   1   0 1461.77   61.79  -2
   1   6   0 1461.77   61.79   1
   1  -7   1   18.25    6.32  -2
  -7   1  -1   18.25    6.32   1
   1  -7   1   27.29    8.17  -2
  -7   1  -1   27.29    8.17   1
   6  -7  -1   28.48    8.35  -2
  -7   6   1   28.48    8.35   1
   6   1   1   32.35    8.94  -2
   1   6  -1   32.35    8.94   1
   1  -7   2  174.37   14.92  -2
  -7   1  -2  174.37   14.92   1
  -7   6   2  183.73   16.42  -2
   6  -7  -2  183.73   16.42   1
   1  -7   2  200.27   19.35  -2
  -7   1  -2  200.27   19.35   1
   6  -7  -2  175.14   18.12  -2
  -7   6   2  175.14   18.12   1
   6   1   2  185.10   18.43  -2
   1   6  -2  185.10   18.43   1
   6   1   2  189.80   18.70  -2
   1   6  -2  189.80   18.70   1
  -7   6   3  103.23    9.25  -2
   6  -7  -3  103.23    9.25   1
   1  -7   3  131.88   13.02  -2
  -7   1  -3  131.88   13.02   1
   6  -7  -3  122.98   12.01  -2
  -7   6   3  122.98   12.01   1
  -8   2   2   14.68    4.31  -2
   2  -8  -2   14.68    4.31   1
   2  -8  -1   42.36    6.75  -2
  -8   2   1   42.36    6.75   1
   2  -8  -1   48.36    8.56  -2
  -8   2   1   48.36    8.56   1
   6   2  -1   36.30    6.11  -2
   2   6   1   36.30    6.11   1
   2  -8   0  145.19   15.03  -2
  -8   2   0  145.19   15.03   1
   2  -8   0  109.90   13.42  -2
  -8   2   0  109.90   13.42   1
   6   2   0  133.28   13.81  -2
   2   6   0  133.28   13.81   1
   6   2   0  136.81   14.36  -2
   2   6   0  136.81   14.36   1
   2  -8   1   93.48   12.08  -2
  -8   2  -1   93.48   12.08   1
   6   2   1  127.71   13.89  -2
   2   6  -1  127.71   13.89   1
   2  -8   2   95.13    9.70  -2
  -8   2  -2   95.13    9.70   1
  -3   7   4  119.01   11.73  -2
   7  -3  -4  119.01   11.73   1
  -3   7   3   16.39    6.84  -2
   7  -3  -3   16.39    6.84   1
  -3   7   3   11.66    4.90  -2
   7  -3  -3   11.66    4.90   1
   7  -3  -3   16.70    5.90  -2
  -3   7   3   16.70    5.90   1
  -3   7   2  497.56   35.33  -2
   7  -3  -2  497.56   35.33   1
   7  -3  -2  567.45   35.19  -2
  -3   7   2  567.45   35.19   1
  -3   7   1  130.57   19.47  -2
   7  -3  -1  130.57   19.47   1
   7  -3  -1  176.98   21.55  -2
  -3   7   1  176.98   21.55   1
   7  -4   0  168.74   18.27  -2
  -4   7   0  168.74   18.27   1
   7  -3   0  157.21   19.38  -2
  -3   7   0  157.21   19.38   1
   7  -4   0  150.25   18.51  -2
  -4   7   0  150.25   18.51   1
   7  -3   0  195.15   24.37  -2
  -3   7   0  195.15   24.37   1
   7  -4  -1  118.69   16.56  -2
  -4   7   1  118.69   16.56   1
   7  -4  -1  121.20   17.48  -2
  -4   7   1  121.20   17.48   1
   7  -3   1  145.79   19.72  -2
  -3   7  -1  145.79   19.72   1
   7  -3   1  140.28   18.43  -2
  -3   7  -1  140.28   18.43   1
  -4   7   2   80.18   13.92  -2
   7  -4  -2   80.18   13.92   1
   7  -4  -2   91.51   13.39  -2
  -4   7   2   91.51   13.39   1
  -4   7   3   35.43    8.43  -2
   7  -4  -3   35.43    8.43   1
   7  -4  -3   38.39    8.29  -2
  -4   7   3   38.39    8.29   1
  -3  -4   4  421.15   20.76  -2
  -4  -3  -4  421.15   20.76   1
  -2   7   4   67.96    8.32  -2
   7  -2  -4   67.96    8.32   1
  -2   7   3   88.37   14.44  -2
   7  -2  -3   88.37   14.44   1
   7  -2  -3   75.35   10.10  -2
  -2   7   3   75.35   10.10   1
  -2   7   2  265.34   27.54  -2
   7  -2  -2  265.34   27.54   1
   7  -2  -2  360.68   27.04  -2
  -2   7   2  360.68   27.04   1
  -2   7   1   69.66   15.17  -2
   7  -2  -1   69.66   15.17   1
   7  -2  -1   95.69   17.16  -2
  -2   7   1   95.69   17.16   1
   7  -2  -1   82.23   14.65  -2
  -2   7   1   82.23   14.65   1
   7  -5   1  106.21   14.51  -2
  -5   7  -1  106.21   14.51   1
   7  -5   0  220.49   20.89  -2
  -5   7   0  220.49   20.89   1
   7  -2   0  236.41   23.35  -2
  -2   7   0  236.41   23.35   1
   7  -2   0  261.27   28.09  -2
  -2   7   0  261.27   28.09   1
   7  -2   0  265.56   26.24  -2
  -2   7   0  265.56   26.24   1
   7  -5   0  234.36   23.06  -2
  -5   7   0  234.36   23.06   1
   7  -5  -1   95.20   13.93  -2
  -5   7   1   95.20   13.93   1
   7  -5  -1  116.22   16.51  -2
  -5   7   1  116.22   16.51   1
   7  -2   1   92.12   15.68  -2
  -2   7  -1   92.12   15.68   1
   7  -2   1  113.92   16.55  -2
  -2   7  -1  113.92   16.55   1
   7  -5  -1  103.88   15.83  -2
  -5   7   1  103.88   15.83   1
   7  -5  -2   74.35   12.41  -2
  -5   7   2   74.35   12.41   1
   7  -5  -2   79.30   12.33  -2
  -5   7   2   79.30   12.33   1
   7  -5  -3   66.22   10.35  -2
  -5   7   3   66.22   10.35   1
   7  -5  -3   51.67    9.05  -2
  -5   7   3   51.67    9.05   1
  -2  -5   4   15.88    3.40  -2
  -5  -2  -4   15.88    3.40   1
  -1   7   3  107.97   14.17  -2
   7  -1  -3  107.97   14.17   1
  -1   7   3  119.52   13.85  -2
   7  -1  -3  119.52   13.85   1
   7  -1  -3   82.87    8.49  -2
  -1   7   3   82.87    8.49   1
  -1   7   2   88.79   15.47  -2
   7  -1  -2   88.79   15.47   1
   7  -1  -2   76.97   11.90  -2
  -1   7   2   76.97   11.90   1
  -1   7   1   72.69   15.54  -2
   7  -1  -1   72.69   15.54   1
   7  -1  -1   97.20   16.20  -2
  -1   7   1   97.20   16.20   1
   7  -1  -1   79.91   13.17  -2
  -1   7   1   79.91   13.17   1
   7  -1   0 1494.26   62.87  -2
  -1   7   0 1494.26   62.87   1
   7  -1   0 1402.60   56.46  -2
  -1   7   0 1402.60   56.46   1
   7  -6   0 1394.76   52.30  -2
  -6   7   0 1394.76   52.30   1
   7  -6  -1   21.14    7.23  -2
  -6   7   1   21.14    7.23   1
   7  -6  -1   29.58    7.79  -2
  -6   7   1   29.58    7.79   1
   7  -1   1   27.26    8.72  -2
  -1   7  -1   27.26    8.72   1
   7  -1   1   20.72    6.95  -2
  -1   7  -1   20.72    6.95   1
  -1  -6   2  174.39   15.72  -2
  -6  -1  -2  174.39   15.72   1
  -1  -6   2  166.67   15.57  -2
  -6  -1  -2  166.67   15.57   1
   7  -6  -2  189.03   18.02  -2
  -6   7   2  189.03   18.02   1
  -1  -6   3  121.99   11.30  -2
  -6  -1  -3  121.99   11.30   1
  -1  -6   3  117.24   11.02  -2
  -6  -1  -3  117.24   11.02   1
   0   7   2   12.26    5.55  -2
   7   0  -2   12.26    5.55   1
  -7   0   2    8.56    3.98  -2
   0  -7  -2    8.56    3.98   1
   7   0  -2   10.49    3.76  -2
   0   7   2   10.49    3.76   1
   0   7   1  227.17   23.94  -2
   7   0  -1  227.17   23.94   1
   7   0  -1  205.76   18.94  -2
   0   7   1  205.76   18.94   1
   7   0  -1  188.38   16.76  -2
   0   7   1  188.38   16.76   1
   0   7   0  157.89   21.42  -2
   7   0   0  157.89   21.42   1
   7   0   0  127.77   16.13  -2
   0   7   0  127.77   16.13   1
   7   0   0  153.06   16.74  -2
   0   7   0  153.06   16.74   1
   7  -7  -1   12.02    4.64  -2
  -7   7   1   12.02    4.64   1
   7   0   1   18.53    6.26  -2
   0   7  -1   18.53    6.26   1
   0  -7   2  384.80   18.58  -2
  -7   0  -2  384.80   18.58   1
   7  -7  -2  368.78   20.72  -2
  -7   7   2  368.78   20.72   1
   1   7   1   71.92    9.29  -2
   7   1  -1   71.92    9.29   1
   1   7   0   95.23   11.64  -2
   7   1   0   95.23   11.64   1
   1  -8   0   65.45    6.78  -2
  -8   1   0   65.45    6.78   1
   7   1   0   68.79    7.49  -2
   1   7   0   68.79    7.49   1
   7   1   0   82.88    8.77  -2
   1   7   0   82.88    8.77   1
   7   1   0   71.32    8.01  -2
   1   7   0   71.32    8.01   1
   1   7  -1   71.17    8.99  -2
   7   1   1   71.17    8.99   1
   1  -8   1   82.77    8.30  -2
  -8   1  -1   82.77    8.30   1
   7   1   1   75.38    8.03  -2
   1   7  -1   75.38    8.03   1
   8  -4   1   21.78    5.63  -2
  -4   8  -1   21.78    5.63   1
   8  -4  -1   22.48    6.04  -2
  -4   8   1   22.48    6.04   1
   8  -4  -2  209.12   15.58  -2
  -4   8   2  209.12   15.58   1
   8  -4  -2  193.22   13.94  -2
  -4   8   2  193.22   13.94   1
  -3   8   2   48.64    8.14  -2
   8  -3  -2   48.64    8.14   1
   8  -3  -2   74.88    9.00  -2
  -3   8   2   74.88    9.00   1
   8  -3  -2   56.71    6.94  -2
  -3   8   2   56.71    6.94   1
   8  -3  -1   50.40    8.84  -2
  -3   8   1   50.40    8.84   1
  -3   8   0  171.61   17.09  -2
   8  -3   0  171.61   17.09   1
   8  -5   0  191.71   16.83  -2
  -5   8   0  191.71   16.83   1
   8  -5  -1   56.13    9.32  -2
  -5   8   1   56.13    9.32   1
   8  -5  -2   52.78    7.48  -2
  -5   8   2   52.78    7.48   1
   8  -5  -2   58.72    8.32  -2
  -5   8   2   58.72    8.32   1
  -2   8   2   17.94    4.95  -2
   8  -2  -2   17.94    4.95   1
  -2   8   1   39.21    8.55  -2
   8  -2  -1   39.21    8.55   1
   8  -2  -1   43.42    7.68  -2
  -2   8   1   43.42    7.68   1
   8  -6   0  117.21   12.17  -2
  -6   8   0  117.21   12.17   1
  -2   8   0  128.84   15.73  -2
   8  -2   0  128.84   15.73   1
   8  -2   0  110.17   12.75  -2
  -2   8   0  110.17   12.75   1
   8  -6  -1   83.07   10.15  -2
  -6   8   1   83.07   10.15   1
  -2   8  -1  111.39   14.50  -2
   8  -2   1  111.39   14.50   1
  -1   8   1   60.37    8.73  -2
   8  -1  -1   60.37    8.73   1
  -1   8   0   90.23   11.25  -2
   8  -1   0   90.23   11.25   1
   8  -1   0   75.28    8.29  -2
  -1   8   0   75.28    8.29   1
  -1   8  -1  111.21   11.21  -2
   8  -1   1  111.21   11.21   1
   0   0   0    0.00    0.00   0
   0   0   0
CELL 6.9848 6.9848 5.4744 90.0 90.0 120.0
REM TWIN 0 1 0 1 0 0 0 0 -1
BASF 0.3394
HKLF 5
;
_shelx_hkl_checksum                30118
_olex2_submission_special_instructions  'No special instructions were received'
_oxdiff_exptl_absorpt_empirical_details
;
Empirical correction (ABSPACK) includes:
- Absorption correction using spherical harmonics
- Frame scaling
;
_oxdiff_exptl_absorpt_empirical_full_max  1.494
_oxdiff_exptl_absorpt_empirical_full_min  0.700
loop_
  _twin_individual_id
  _twin_individual_mass_fraction_refined
 1 0.500(5)
 2 0.500(5)
